# Supplementary material for: Hematopoietic dysregulation caused by neutrophils underlies impaired T-cell response and enhanced susceptibility to tuberculosis.
Source: Research Square preprint supplement (doi:10.21203/rs.3.rs-2921835/v1), 2023-05-21
Supplement: Supplementary file 2 [file 41245523cc28168d8d41ee51.xlsx]

## Sheet: Significant DEGs_BM
SUPPLEMENTARY TABLE 2
DATA: DEGs of neutrophils isolated from the bone marrow of IL-1R1 KO mice compared to BL/6 mice
ID	log2FoldChange	pvalue	padj	Gene.name
ENSMUSG00000000142	-2.22505	0.000701455	0.00336761	Axin2
ENSMUSG00000000154	1.55887	0.00655105	0.0221919	Slc22a18
ENSMUSG00000000276	-1.31193	8.61304e-07	9.22641e-06	Dgke
ENSMUSG00000000278	1.22197	2.93768e-05	0.000214552	Scpep1
ENSMUSG00000000295	1.49619	1.85982e-06	1.8435e-05	Hddc2
ENSMUSG00000000303	-1.67228	2.12928e-05	0.00016175	Cdh1
ENSMUSG00000000320	-2.90598	1.90483e-12	5.36687e-11	Alox12
ENSMUSG00000000325	-2.99042	5.39422e-09	8.9505e-08	Arvcf
ENSMUSG00000000340	1.08707	1.93825e-06	1.90693e-05	Dbt
ENSMUSG00000000562	1.00218	3.14614e-06	2.93548e-05	Adora3
ENSMUSG00000000686	-2.21299	7.46188e-11	1.67971e-09	Abhd15
ENSMUSG00000000791	2.08581	5.3037e-39	1.11952e-36	Il12rb1
ENSMUSG00000000903	-4.12442	6.71042e-13	2.01877e-11	Vpreb3
ENSMUSG00000000957	1.01682	0.00293849	0.0112876	Mmp14
ENSMUSG00000000982	-2.50517	1.39114e-39	3.14252e-37	Ccl3
ENSMUSG00000001020	1.50598	8.23873e-06	6.96532e-05	S100a4
ENSMUSG00000001053	-1.87787	5.98158e-08	8.09022e-07	N4bp3
ENSMUSG00000001119	-2.34697	0.000372262	0.00196929	Col6a1
ENSMUSG00000001227	1.68923	6.13158e-05	0.000412058	Sema6b
ENSMUSG00000001288	-1.42505	1.28543e-19	7.84417e-18	Rarg
ENSMUSG00000001305	1.13852	0.00070676	0.00338677	Rrp15
ENSMUSG00000001467	1.23281	4.46916e-12	1.18894e-10	Cyp51
ENSMUSG00000001542	-1.73065	8.92585e-26	9.42043e-24	Ell2
ENSMUSG00000001666	1.14577	3.2456e-08	4.56725e-07	Ddt
ENSMUSG00000001870	-2.29933	1.34748e-05	0.000108303	Ltbp1
ENSMUSG00000001930	-1.85221	2.61229e-05	0.00019409	Vwf
ENSMUSG00000001946	-1.93993	0.00983246	0.0311145	Esam
ENSMUSG00000002108	-1.22604	0.00038222	0.00201204	Nr1h3
ENSMUSG00000002204	1.27123	2.44793e-21	1.73184e-19	Napsa
ENSMUSG00000002227	-1.14117	1.59319e-20	1.05742e-18	Mov10
ENSMUSG00000002233	-2.61109	3.77882e-34	6.57515e-32	Rhoc
ENSMUSG00000002379	1.03073	1.97703e-07	2.40834e-06	Ndufa11
ENSMUSG00000002500	-1.03776	0.00022641	0.00128312	Rpl3l
ENSMUSG00000002504	-1.59485	1.14847e-16	5.41675e-15	Slc9a3r2
ENSMUSG00000002660	1.02494	8.53755e-05	0.000549099	Clpp
ENSMUSG00000002944	-1.80369	0.0102467	0.0321548	Cd36
ENSMUSG00000002985	1.286	2.62248e-06	2.49756e-05	Apoe
ENSMUSG00000003228	-1.9976	8.95826e-36	1.69627e-33	Grk5
ENSMUSG00000003379	-1.00224	0.000179619	0.00105462	Cd79a
ENSMUSG00000003545	-1.75621	0.00017149	0.00101289	Fosb
ENSMUSG00000003752	-1.45614	1.04575e-10	2.28221e-09	Itpkc
ENSMUSG00000003847	-1.53925	9.04497e-09	1.43781e-07	Nfat5
ENSMUSG00000003849	1.13883	1.76891e-16	8.22254e-15	Nqo1
ENSMUSG00000003882	-1.49002	0.00529561	0.0185895	Il7r
ENSMUSG00000003955	1.08773	1.67898e-11	4.12568e-10	Fam162a
ENSMUSG00000004044	-1.45166	0.00823464	0.0268497	Cavin1
ENSMUSG00000004110	-1.27755	3.93563e-05	0.000279048	Cacna1e
ENSMUSG00000004113	2.96626	4.59317e-05	0.000319858	Cacna1b
ENSMUSG00000004187	-1.36166	0.00729134	0.0242342	Kifc2
ENSMUSG00000004383	-1.40031	0.00110689	0.00497604	Large1
ENSMUSG00000004552	-1.30937	1.30754e-22	1.07235e-20	Ctse
ENSMUSG00000004558	1.2826	0.00701657	0.0234907	Ndrg2
ENSMUSG00000004561	1.08195	0.0013703	0.00596687	Mettl17
ENSMUSG00000004730	-1.49816	4.9759e-07	5.62015e-06	Adgre1
ENSMUSG00000004837	1.62776	1.7018e-06	1.7026e-05	Grap
ENSMUSG00000005057	-1.65716	3.58354e-21	2.48073e-19	Sh2b2
ENSMUSG00000005339	-1.75407	2.66601e-06	2.53527e-05	Fcer1a
ENSMUSG00000005364	-1.67863	3.5753e-05	0.000256038	Il5ra
ENSMUSG00000005397	-3.56733	4.88639e-06	4.39366e-05	Nid1
ENSMUSG00000005447	-1.67005	1.54641e-05	0.000122157	Pafah1b3
ENSMUSG00000005465	-1.98248	0.000516307	0.00259483	Il27ra
ENSMUSG00000005583	-1.32193	4.14212e-09	7.01763e-08	Mef2c
ENSMUSG00000005611	-1.51236	0.0143168	0.0420694	Mrvi1
ENSMUSG00000006154	-2.08002	2.06402e-08	2.99283e-07	Eps8l1
ENSMUSG00000006179	1.51582	6.16413e-43	1.8458e-40	Prss16
ENSMUSG00000006345	1.61183	4.27162e-11	9.96401e-10	Ggt1
ENSMUSG00000006362	-1.29308	1.75062e-05	0.000136746	Cbfa2t3
ENSMUSG00000006369	1.90577	5.57459e-06	4.92983e-05	Fbln1
ENSMUSG00000006378	1.02559	0.0157575	0.0454918	Gcat
ENSMUSG00000006389	-2.04815	1.87334e-05	0.000144959	Mpl
ENSMUSG00000006395	-1.06473	0.000393321	0.00206183	Hyi
ENSMUSG00000006445	-3.16654	3.40812e-09	5.85106e-08	Epha2
ENSMUSG00000006638	-1.59325	0.00116152	0.00516963	Abhd1
ENSMUSG00000006705	-1.27612	2.05251e-12	5.74524e-11	Pknox1
ENSMUSG00000007872	-2.3089	0.00108471	0.00489033	Id3
ENSMUSG00000007892	1.06093	1.49348e-06	1.52016e-05	Rplp1
ENSMUSG00000008136	2.19301	0.00055206	0.00274877	Fhl2
ENSMUSG00000008193	-3.24085	1.62122e-25	1.66999e-23	Spib
ENSMUSG00000008668	1.04564	7.31016e-07	7.93639e-06	Rps18
ENSMUSG00000008855	-1.07822	4.91052e-17	2.4041e-15	Hdac5
ENSMUSG00000009185	1.78698	0.000282819	0.00155557	Ccl8
ENSMUSG00000009248	-2.20541	4.31658e-12	1.15312e-10	Ascl2
ENSMUSG00000009376	2.07892	4.11994e-05	0.000290676	Met
ENSMUSG00000009418	-1.45876	0.000800014	0.00376498	Nav1
ENSMUSG00000009585	1.19074	5.20488e-17	2.53856e-15	Apobec3
ENSMUSG00000009628	-1.93588	8.8566e-15	3.43487e-13	Tex15
ENSMUSG00000009633	-2.19417	2.35027e-20	1.53615e-18	G0s2
ENSMUSG00000009731	-1.12014	0.000231204	0.00130684	Kcnd1
ENSMUSG00000010142	1.68874	2.31597e-22	1.8755e-20	Tnfrsf13b
ENSMUSG00000010307	1.08331	4.11951e-05	0.000290676	Tmem86a
ENSMUSG00000010406	1.21585	0.000124399	0.000762382	Mrpl52
ENSMUSG00000010721	1.68428	0.000439569	0.00226396	Lmbr1
ENSMUSG00000011114	1.00953	4.01729e-15	1.63175e-13	Tbrg1
ENSMUSG00000011305	1.17972	9.00524e-06	7.48622e-05	Plin5
ENSMUSG00000012123	1.2099	0.000197053	0.00113782	Crybg2
ENSMUSG00000012428	-2.46251	1.97485e-12	5.5399e-11	Steap4
ENSMUSG00000012705	-2.64895	1.29661e-10	2.7641e-09	Retn
ENSMUSG00000012848	1.02419	3.12489e-07	3.65948e-06	Rps5
ENSMUSG00000013236	-1.37021	1.48959e-05	0.00011803	Ptprs
ENSMUSG00000014030	-2.03139	1.30732e-10	2.78232e-09	Pax5
ENSMUSG00000014599	-1.11344	1.03356e-07	1.34019e-06	Csf1
ENSMUSG00000014633	1.06471	1.01545e-07	1.31937e-06	Cmc2
ENSMUSG00000015053	-1.33772	1.11483e-05	9.06794e-05	Gata2
ENSMUSG00000015312	-2.12903	2.17727e-111	7.00865e-108	Gadd45b
ENSMUSG00000015314	-1.4653	0.00352035	0.0131614	Slamf6
ENSMUSG00000015452	1.03962	4.02675e-07	4.62108e-06	Ager
ENSMUSG00000015850	2.81903	1.64111e-60	9.18734e-58	Adamtsl4
ENSMUSG00000015947	1.76436	1.48896e-08	2.25541e-07	Fcgr1
ENSMUSG00000016255	-3.44215	2.00181e-14	7.47109e-13	Tubb1
ENSMUSG00000016529	1.75386	0.0131096	0.0392282	Il10
ENSMUSG00000017314	-2.68909	8.56899e-05	0.000550845	Mpp2
ENSMUSG00000017390	1.56411	2.65561e-13	8.56985e-12	Aldoc
ENSMUSG00000017832	2.06018	2.74893e-06	2.60259e-05	Hspb9
ENSMUSG00000018168	-1.39258	7.5297e-07	8.16097e-06	Ikzf3
ENSMUSG00000018378	-1.82865	2.57181e-12	7.12142e-11	Cuedc1
ENSMUSG00000018417	-2.08449	3.18717e-08	4.49485e-07	Myo1b
ENSMUSG00000018427	-1.49032	0.000627011	0.00306391	Ypel2
ENSMUSG00000018459	1.80074	1.02947e-05	8.4537e-05	Slc13a3
ENSMUSG00000018593	-2.92173	1.1529e-13	3.9601e-12	Sparc
ENSMUSG00000018669	1.01424	8.88666e-09	1.4179e-07	Cdk5rap3
ENSMUSG00000018698	-3.46832	1.92077e-18	1.05242e-16	Lhx1
ENSMUSG00000018907	-3.93044	2.73257e-10	5.63856e-09	Alox12e
ENSMUSG00000018924	-3.75297	2.12172e-33	3.50246e-31	Alox15
ENSMUSG00000018927	-3.58655	3.81252e-53	1.75322e-50	Ccl6
ENSMUSG00000018930	-2.43914	1.88545e-33	3.15286e-31	Ccl4
ENSMUSG00000018973	-2.64962	9.51597e-07	1.01262e-05	Hoxb1
ENSMUSG00000019158	1.09716	1.94363e-11	4.7488e-10	Tmem160
ENSMUSG00000019539	-1.59551	0.00262136	0.0102697	Rcn3
ENSMUSG00000019806	1.28525	0.00807795	0.0264257	Aig1
ENSMUSG00000019828	-3.33862	6.706e-16	2.95707e-14	Grm1
ENSMUSG00000019850	-1.90727	0.000470366	0.0023948	Tnfaip3
ENSMUSG00000019864	-1.18042	1.79386e-07	2.21243e-06	Rtn4ip1
ENSMUSG00000019866	-1.03467	8.67313e-06	7.25635e-05	Crybg1
ENSMUSG00000019876	1.13724	0.00146684	0.00631674	Pkib
ENSMUSG00000019891	-1.86802	0.00364801	0.0135757	Dcbld1
ENSMUSG00000019990	-1.22369	5.65559e-07	6.30488e-06	Pde7b
ENSMUSG00000020010	-2.24739	5.74576e-22	4.43009e-20	Vnn3
ENSMUSG00000020023	-1.04933	0.00319168	0.0120977	Tmcc3
ENSMUSG00000020032	-2.18733	3.08231e-09	5.34877e-08	Nuak1
ENSMUSG00000020044	-2.1107	2.55064e-05	0.000189838	Timp3
ENSMUSG00000020089	1.46213	2.68489e-08	3.82843e-07	Ppa1
ENSMUSG00000020097	-1.32723	6.22368e-25	6.2121e-23	Sgpl1
ENSMUSG00000020102	-1.75301	4.87454e-12	1.29412e-10	Slc16a7
ENSMUSG00000020116	1.03573	4.56693e-06	4.13238e-05	Pno1
ENSMUSG00000020151	1.48746	0.00402005	0.0147513	Ptprr
ENSMUSG00000020183	-2.53482	0.000199401	0.00114928	Cpm
ENSMUSG00000020230	-2.31302	0.000778553	0.00367877	Prmt2
ENSMUSG00000020275	-1.44845	2.2755e-07	2.72552e-06	Rel
ENSMUSG00000020288	1.02574	5.46353e-14	1.93797e-12	Ahsa2
ENSMUSG00000020334	-1.37799	6.40676e-11	1.46265e-09	Slc22a4
ENSMUSG00000020357	-3.26623	1.85169e-06	1.83827e-05	Flt4
ENSMUSG00000020372	1.00093	3.22775e-07	3.76795e-06	Rack1
ENSMUSG00000020401	-2.03867	7.55886e-11	1.69561e-09	Fam71b
ENSMUSG00000020407	1.41347	3.2049e-08	4.51491e-07	Upp1
ENSMUSG00000020423	-1.72292	2.56698e-39	5.56365e-37	Btg2
ENSMUSG00000020424	-1.81215	9.33442e-12	2.40389e-10	Gatsl3
ENSMUSG00000020475	1.0832	1.6104e-08	2.40273e-07	Pgam2
ENSMUSG00000020520	-1.55884	4.33672e-15	1.73955e-13	Galnt10
ENSMUSG00000020541	-1.40521	0.00093852	0.00431431	Tom1l1
ENSMUSG00000020566	4.66036	1.05031e-07	1.35644e-06	Atp6v1c2
ENSMUSG00000020571	1.08992	1.23999e-10	2.66036e-09	Pdia6
ENSMUSG00000020577	-2.15616	7.93403e-25	7.79837e-23	Tspan13
ENSMUSG00000020592	-1.62372	5.67172e-05	0.000383959	Sdc1
ENSMUSG00000020601	-2.16556	5.6854e-05	0.000384683	Trib2
ENSMUSG00000020638	1.00131	2.05026e-08	2.97959e-07	Cmpk2
ENSMUSG00000020681	-3.70928	5.93189e-20	3.70772e-18	Ace
ENSMUSG00000020736	1.09273	2.86244e-16	1.29033e-14	Nt5c
ENSMUSG00000020802	-1.16435	0.000584309	0.00288542	Ube2o
ENSMUSG00000020826	2.49917	6.3385e-08	8.51927e-07	Nos2
ENSMUSG00000020834	1.26566	0.000137388	0.000834045	Dhrs13
ENSMUSG00000020847	-1.13466	1.27936e-07	1.62136e-06	Rph3al
ENSMUSG00000020857	1.32293	1.85702e-06	1.84214e-05	Nme2
ENSMUSG00000020865	-1.26922	0.00143047	0.00618079	Abcc3
ENSMUSG00000020866	-5.86281	2.79423e-06	2.63965e-05	Cacna1g
ENSMUSG00000020900	-1.55367	5.34116e-11	1.22998e-09	Myh10
ENSMUSG00000020941	-1.20019	1.96735e-16	9.07941e-15	Map3k14
ENSMUSG00000020956	1.35364	1.81622e-11	4.44594e-10	Dtd2
ENSMUSG00000020961	-1.53954	6.89015e-13	2.06801e-11	Ston2
ENSMUSG00000020963	-2.12402	1.03394e-09	1.92942e-08	Tshr
ENSMUSG00000021025	-1.58643	4.01288e-05	0.000283433	Nfkbia
ENSMUSG00000021062	4.37035	2.1082e-46	7.75575e-44	Rab15
ENSMUSG00000021125	-1.79472	1.06467e-35	1.95839e-33	Arg2
ENSMUSG00000021136	1.0694	0.00218254	0.00884835	Smoc1
ENSMUSG00000021186	-3.2356	2.17855e-06	2.11068e-05	Fbln5
ENSMUSG00000021250	-2.01295	6.73907e-25	6.67479e-23	Fos
ENSMUSG00000021286	1.12265	0.000204811	0.00117677	Zfyve21
ENSMUSG00000021298	-1.87993	6.30005e-24	5.75315e-22	Gpr132
ENSMUSG00000021356	-2.86585	4.54862e-14	1.6179e-12	Irf4
ENSMUSG00000021492	-1.04793	0.00148804	0.00639571	F12
ENSMUSG00000021508	-3.36433	5.55249e-06	4.91367e-05	Cxcl14
ENSMUSG00000021553	2.21653	0.000314912	0.00170442	Slc28a3
ENSMUSG00000021559	-1.75732	5.57879e-21	3.82088e-19	Dapk1
ENSMUSG00000021614	2.70844	2.76814e-09	4.83616e-08	Vcan
ENSMUSG00000021668	1.40115	4.61107e-06	4.16646e-05	Polk
ENSMUSG00000021675	-1.49082	6.71156e-07	7.35473e-06	F2rl2
ENSMUSG00000021699	1.14129	8.65975e-06	7.25458e-05	Pde4d
ENSMUSG00000021701	-1.70661	2.38283e-18	1.27839e-16	Plk2
ENSMUSG00000021725	-1.27371	5.79189e-19	3.34423e-17	Parp8
ENSMUSG00000021756	-1.14143	0.00125095	0.00550676	Il6st
ENSMUSG00000021765	1.36548	0.000970865	0.0044487	Fst
ENSMUSG00000021815	1.29386	0.00114717	0.00512523	Mss51
ENSMUSG00000021895	-1.32737	8.16125e-13	2.42689e-11	Arhgef3
ENSMUSG00000021951	1.48382	6.46216e-16	2.85934e-14	Eef1akmt1
ENSMUSG00000021958	1.1835	0.00250723	0.00991192	Pinx1
ENSMUSG00000022010	-1.4945	0.000449405	0.00230264	Tsc22d1
ENSMUSG00000022013	1.15728	3.81654e-15	1.56005e-13	Dnajc15
ENSMUSG00000022016	-1.21192	1.95749e-11	4.7736e-10	Akap11
ENSMUSG00000022057	-2.62646	0.000769711	0.00364368	Adamdec1
ENSMUSG00000022091	-1.74477	0.00170247	0.0071778	Sorbs3
ENSMUSG00000022094	-1.92831	0.000427375	0.00220733	Slc39a14
ENSMUSG00000022096	1.40323	0.00588511	0.0203318	Hr
ENSMUSG00000022102	-1.45671	3.87613e-16	1.73295e-14	Dok2
ENSMUSG00000022103	-1.79562	0.00237148	0.0094712	Gfra2
ENSMUSG00000022126	-3.11461	2.47314e-13	8.00104e-12	Acod1
ENSMUSG00000022150	-1.87351	0.00785766	0.0257903	Dab2
ENSMUSG00000022157	-1.6527	3.48925e-08	4.88875e-07	Mcpt8
ENSMUSG00000022180	-1.0189	0.000126972	0.000777411	Slc7a8
ENSMUSG00000022184	1.13712	5.17423e-09	8.62998e-08	Fbxo4
ENSMUSG00000022257	1.25341	4.09813e-06	3.73179e-05	Laptm4b
ENSMUSG00000022265	-1.36914	0.0021961	0.00889773	Ank
ENSMUSG00000022270	-1.09449	1.57761e-11	3.90642e-10	Fam134b
ENSMUSG00000022305	2.3023	2.71684e-14	9.96639e-13	Lrp12
ENSMUSG00000022309	-1.38518	0.0119564	0.0363519	Angpt1
ENSMUSG00000022351	1.73744	8.56778e-19	4.90306e-17	Sqle
ENSMUSG00000022367	-2.18071	4.01969e-12	1.08279e-10	Has2
ENSMUSG00000022425	-4.44721	3.90078e-15	1.58944e-13	Enpp2
ENSMUSG00000022438	-1.16665	6.49934e-05	0.000433154	Parvb
ENSMUSG00000022469	1.30291	0.000695486	0.00334394	Rapgef3
ENSMUSG00000022503	1.00572	1.24762e-08	1.92157e-07	Nubp1
ENSMUSG00000022562	-1.28352	2.42373e-05	0.000181441	Oplah
ENSMUSG00000022587	1.47349	4.99589e-23	4.23205e-21	Ly6e
ENSMUSG00000022594	-2.01735	0.000348146	0.00185928	Lynx1
ENSMUSG00000022636	-1.53878	1.37756e-19	8.36672e-18	Alcam
ENSMUSG00000022671	1.07588	4.74189e-05	0.000328494	Mzt2
ENSMUSG00000022747	-2.33044	4.82434e-18	2.51491e-16	St3gal6
ENSMUSG00000022748	1.38421	0.000474884	0.00241112	Cmss1
ENSMUSG00000022755	-1.41836	0.000189567	0.00110247	Adgrg7
ENSMUSG00000022769	1.73975	4.20779e-08	5.8383e-07	Sdf2l1
ENSMUSG00000022802	1.58684	6.9936e-12	1.83775e-10	Lmln
ENSMUSG00000022816	-1.58257	0.0056996	0.0197652	Fstl1
ENSMUSG00000022836	-3.50362	1.6294e-13	5.44938e-12	Mylk
ENSMUSG00000022865	-1.16798	0.00150728	0.00646925	Cxadr
ENSMUSG00000022885	-1.05377	0.00035555	0.00189255	St6gal1
ENSMUSG00000022894	-3.24862	5.33317e-07	5.9661e-06	Adamts5
ENSMUSG00000022895	-1.48446	4.16815e-15	1.68771e-13	Ets2
ENSMUSG00000022902	4.60013	1.20169e-28	1.48778e-26	Stfa2
ENSMUSG00000022960	1.03515	3.7925e-14	1.36023e-12	Donson
ENSMUSG00000023011	-2.85911	1.93951e-06	1.90693e-05	Faim2
ENSMUSG00000023022	-3.05021	2.71665e-35	4.9267e-33	Lima1
ENSMUSG00000023032	2.67273	7.7553e-09	1.25291e-07	Slc4a8
ENSMUSG00000023034	-2.39437	2.85407e-106	7.34979e-103	Nr4a1
ENSMUSG00000023039	-3.58776	2.96854e-14	1.0828e-12	Krt7
ENSMUSG00000023044	-1.08799	6.94149e-06	5.99454e-05	Csad
ENSMUSG00000023132	1.2369	0.000907363	0.00419806	Gzma
ENSMUSG00000023186	1.2191	1.53712e-18	8.60519e-17	Vwa5a
ENSMUSG00000023206	1.45047	1.89017e-15	7.97961e-14	Il15ra
ENSMUSG00000023224	-1.55219	0.00117471	0.00521752	Serping1
ENSMUSG00000023274	-1.33423	5.15154e-05	0.000352786	Cd4
ENSMUSG00000023328	-1.19012	0.000558905	0.00278178	Ache
ENSMUSG00000023345	1.09342	3.95568e-08	5.5063e-07	Poc1a
ENSMUSG00000023349	-3.08596	7.62344e-17	3.66266e-15	Clec4n
ENSMUSG00000023467	-2.27687	0.000188662	0.00109885	Tulp2
ENSMUSG00000023495	-2.82228	7.42452e-09	1.20098e-07	Pcbp4
ENSMUSG00000023827	-1.73477	3.47078e-15	1.42324e-13	Agpat4
ENSMUSG00000023909	1.29457	2.25438e-05	0.000170049	Paqr4
ENSMUSG00000023947	-1.11218	1.75969e-24	1.67836e-22	Nfkbie
ENSMUSG00000023959	1.52969	0.00434997	0.0157173	Clic5
ENSMUSG00000023963	-1.19102	0.00668174	0.0225871	Cyp39a1
ENSMUSG00000023972	1.03996	0.0117227	0.0357962	Ptk7
ENSMUSG00000023992	1.23237	0.0103299	0.0323777	Trem2
ENSMUSG00000023993	-4.51011	3.29846e-11	7.77856e-10	Treml1
ENSMUSG00000023995	-1.38299	0.00738677	0.0244945	Tspo2
ENSMUSG00000024014	-1.68758	1.61087e-13	5.42973e-12	Pim1
ENSMUSG00000024030	-1.31811	3.49048e-22	2.77429e-20	Abcg1
ENSMUSG00000024042	-1.03339	2.01405e-08	2.93691e-07	Sik1
ENSMUSG00000024044	-1.08087	0.0163287	0.0468155	Epb41l3
ENSMUSG00000024063	-1.25287	2.74196e-14	1.003e-12	Lbh
ENSMUSG00000024065	-1.64468	0.00220326	0.00892112	Ehd3
ENSMUSG00000024085	1.06765	9.81701e-12	2.513e-10	Man2a1
ENSMUSG00000024140	-2.05334	8.42649e-06	7.08684e-05	Epas1
ENSMUSG00000024190	-1.34946	9.15781e-13	2.69831e-11	Dusp1
ENSMUSG00000024193	-1.10428	2.26315e-25	2.31272e-23	Phf1
ENSMUSG00000024222	1.78685	4.65506e-30	6.11618e-28	Fkbp5
ENSMUSG00000024247	1.72147	0.0044249	0.0159371	Pkdcc
ENSMUSG00000024338	1.20844	7.48051e-13	2.23478e-11	Psmb8
ENSMUSG00000024340	-1.69786	5.88643e-06	5.1701e-05	Btnl2
ENSMUSG00000024353	-1.48044	0.000616795	0.00301972	Mzb1
ENSMUSG00000024381	-1.17101	0.00037055	0.00196184	Bin1
ENSMUSG00000024423	-1.38745	3.81251e-10	7.65832e-09	Impact
ENSMUSG00000024462	-2.49583	2.903e-42	8.30644e-40	Gabbr1
ENSMUSG00000024511	-2.54096	7.03718e-06	6.06497e-05	Rab27b
ENSMUSG00000024521	-2.00595	1.55442e-40	4.00294e-38	Pmaip1
ENSMUSG00000024589	-1.2067	3.87519e-17	1.91911e-15	Nedd4l
ENSMUSG00000024621	-1.39349	9.50003e-16	4.09105e-14	Csf1r
ENSMUSG00000024644	1.09218	1.50668e-11	3.75242e-10	Cndp2
ENSMUSG00000024664	-2.10275	0.00156764	0.00668376	Fads3
ENSMUSG00000024673	-1.72928	4.66465e-06	4.20897e-05	Ms4a1
ENSMUSG00000024675	1.89587	1.20621e-08	1.86898e-07	Ms4a4c
ENSMUSG00000024677	1.61595	8.82848e-12	2.28723e-10	Ms4a6b
ENSMUSG00000024679	2.5234	1.21038e-16	5.68788e-15	Ms4a6d
ENSMUSG00000024696	1.06462	0.000227326	0.00128662	Lpxn
ENSMUSG00000024730	2.31357	5.14047e-06	4.58688e-05	Ms4a8a
ENSMUSG00000024766	-1.16152	0.0142185	0.0419036	Lipo3
ENSMUSG00000024897	1.41467	0.000910556	0.0042083	Apba1
ENSMUSG00000024905	1.97809	3.62315e-13	1.13508e-11	Tesmin
ENSMUSG00000024907	1.84039	1.59283e-11	3.93653e-10	Gal
ENSMUSG00000024912	-1.17055	4.75176e-05	0.000328944	Fosl1
ENSMUSG00000024936	-1.70053	1.68569e-07	2.08902e-06	Kcnk7
ENSMUSG00000025006	-1.60872	0.00201781	0.00828748	Sorbs1
ENSMUSG00000025014	-3.55712	1.47281e-08	2.23368e-07	Dntt
ENSMUSG00000025044	1.34592	6.6401e-05	0.000439937	Msr1
ENSMUSG00000025058	-1.3389	3.84714e-18	2.03015e-16	5430427O19Rik
ENSMUSG00000025085	-1.20864	0.000140721	0.00085107	Ablim1
ENSMUSG00000025151	-1.98136	9.51555e-05	0.000603314	Maged1
ENSMUSG00000025153	1.4721	1.71637e-10	3.63486e-09	Fasn
ENSMUSG00000025163	-1.5209	7.14751e-05	0.000469547	Cd7
ENSMUSG00000025175	-2.27273	0.0027185	0.0106007	Fn3k
ENSMUSG00000025190	1.21772	2.96113e-30	3.97162e-28	Got1
ENSMUSG00000025203	1.30341	3.09166e-18	1.64497e-16	Scd2
ENSMUSG00000025245	1.04228	0.000185663	0.00108368	Lztfl1
ENSMUSG00000025268	-1.72995	0.00498774	0.0176629	Maged2
ENSMUSG00000025278	-1.09239	8.13495e-07	8.75068e-06	Flnb
ENSMUSG00000025355	1.2271	0.00293521	0.0112817	Mmp19
ENSMUSG00000025366	1.13003	2.30125e-18	1.245e-16	Esyt1
ENSMUSG00000025383	-2.40477	5.14332e-08	7.04525e-07	Il23a
ENSMUSG00000025453	-2.11988	4.30154e-81	5.03515e-78	Nnt
ENSMUSG00000025489	-1.44213	0.0012766	0.00560622	Ifitm5
ENSMUSG00000025521	1.45974	1.00711e-12	2.9405e-11	Tmem192
ENSMUSG00000025602	1.43426	4.01478e-09	6.81982e-08	Zfp202
ENSMUSG00000025779	-1.00782	2.20374e-05	0.000166718	Ly96
ENSMUSG00000025780	-1.02145	1.30631e-05	0.000105191	Itih5
ENSMUSG00000025810	-1.22963	2.1664e-12	6.05088e-11	Nrp1
ENSMUSG00000025854	2.07592	3.51236e-10	7.11087e-09	Fam20c
ENSMUSG00000025857	1.10772	4.95273e-11	1.14903e-09	Dnaaf5
ENSMUSG00000025867	-4.42265	1.20576e-10	2.59621e-09	Cplx2
ENSMUSG00000025887	1.61293	0.012176	0.036889	Casp12
ENSMUSG00000025911	-1.47817	2.36935e-05	0.000177992	Adhfe1
ENSMUSG00000025997	-2.4189	0.000100023	0.000629472	Ikzf2
ENSMUSG00000026003	1.19373	3.12327e-14	1.13602e-12	Acadl
ENSMUSG00000026004	-1.067	3.31568e-07	3.8601e-06	Kansl1l
ENSMUSG00000026028	1.15189	2.26896e-21	1.62306e-19	Trak2
ENSMUSG00000026073	1.00477	9.33479e-12	2.40389e-10	Il1r2
ENSMUSG00000026080	-1.9954	0.00370558	0.0137581	Chst10
ENSMUSG00000026088	1.01136	1.92875e-07	2.35622e-06	Mitd1
ENSMUSG00000026110	-1.50454	1.2574e-21	9.30479e-20	Mgat4a
ENSMUSG00000026185	-3.34381	0.000107974	0.000674236	Igfbp5
ENSMUSG00000026193	2.16521	2.21455e-06	2.14073e-05	Fn1
ENSMUSG00000026220	-1.26976	0.00195133	0.00807627	Slc16a14
ENSMUSG00000026249	1.56502	3.495e-13	1.10569e-11	Serpine2
ENSMUSG00000026271	-1.93936	8.56505e-13	2.52944e-11	Gpr35
ENSMUSG00000026354	-1.50315	8.21242e-08	1.08233e-06	Lct
ENSMUSG00000026360	-1.59274	1.05477e-43	3.39531e-41	Rgs2
ENSMUSG00000026385	1.34673	1.62886e-13	5.44938e-12	Dbi
ENSMUSG00000026437	2.02697	8.27779e-07	8.88206e-06	Cdk18
ENSMUSG00000026482	-1.01466	0.00768406	0.0253173	Rgl1
ENSMUSG00000026527	-1.64764	0.00937215	0.0299295	Rgs7
ENSMUSG00000026536	1.69476	8.04471e-09	1.2948e-07	Mnda
ENSMUSG00000026573	-1.925	0.00179636	0.00752436	Xcl1
ENSMUSG00000026575	1.36219	2.99535e-06	2.80495e-05	Nme7
ENSMUSG00000026576	-2.62285	3.97177e-23	3.40937e-21	Atp1b1
ENSMUSG00000026582	-2.64993	1.42212e-12	4.10566e-11	Sele
ENSMUSG00000026628	-1.55741	8.68918e-22	6.58129e-20	Atf3
ENSMUSG00000026637	-1.11795	1.17415e-06	1.21726e-05	Traf5
ENSMUSG00000026639	-1.72668	2.30151e-19	1.36563e-17	Lamb3
ENSMUSG00000026664	-1.23441	6.44917e-22	4.94283e-20	Phyh
ENSMUSG00000026765	-2.87386	8.31118e-16	3.5911e-14	Lypd6b
ENSMUSG00000026768	-2.84085	2.43555e-14	9.01153e-13	Itga8
ENSMUSG00000026778	-1.70085	0.00108415	0.0048895	Prkcq
ENSMUSG00000026796	1.23621	0.000926347	0.00426749	Fam129b
ENSMUSG00000026809	-2.07213	6.04485e-05	0.000406653	Spaca9
ENSMUSG00000026821	-1.89035	1.46486e-11	3.66244e-10	Ralgds
ENSMUSG00000026826	-1.22883	0.0138471	0.0410536	Nr4a2
ENSMUSG00000026832	-1.03399	4.66354e-17	2.2919e-15	Cytip
ENSMUSG00000026837	1.14947	2.38585e-06	2.28914e-05	Col5a1
ENSMUSG00000026872	-1.99977	1.8405e-30	2.5482e-28	Zeb2
ENSMUSG00000026873	1.89569	9.56323e-24	8.67156e-22	Phf19
ENSMUSG00000026874	1.21871	1.48888e-05	0.00011803	Hc
ENSMUSG00000026875	1.39561	8.13572e-09	1.30781e-07	Traf1
ENSMUSG00000026930	-1.80811	9.39208e-10	1.77454e-08	Gpsm1
ENSMUSG00000026976	1.10798	4.95397e-05	0.000341109	Pax8
ENSMUSG00000026981	-2.32603	1.65289e-40	4.17306e-38	Il1rn
ENSMUSG00000026986	-3.12267	1.53576e-30	2.1494e-28	Hnmt
ENSMUSG00000026988	-1.0398	1.43049e-09	2.62005e-08	Wdsub1
ENSMUSG00000027072	-3.51256	5.26981e-20	3.34256e-18	Prg3
ENSMUSG00000027073	-2.7462	6.90032e-07	7.52953e-06	Prg2
ENSMUSG00000027076	1.18587	1.04147e-05	8.53595e-05	Timm10
ENSMUSG00000027227	-1.35005	2.0606e-14	7.6462e-13	Sord
ENSMUSG00000027287	-1.16038	2.26905e-13	7.35926e-12	Snap23
ENSMUSG00000027315	3.17516	0.000779861	0.00368225	Spint1
ENSMUSG00000027327	-1.18438	2.83321e-06	2.67452e-05	1700037H04Rik
ENSMUSG00000027333	-1.56141	2.11117e-16	9.63951e-15	Smox
ENSMUSG00000027347	-1.47976	0.000991695	0.00452322	Rasgrp1
ENSMUSG00000027359	1.35269	0.000286111	0.00156965	Slc27a2
ENSMUSG00000027368	-1.84042	7.82384e-12	2.03927e-10	Dusp2
ENSMUSG00000027398	-4.52814	2.93178e-104	5.3928e-101	Il1b
ENSMUSG00000027399	-1.24163	0.01122	0.0345453	Il1a
ENSMUSG00000027401	-4.12938	2.50174e-38	5.0332e-36	Tgm3
ENSMUSG00000027435	-1.04447	6.67589e-11	1.51603e-09	Cd93
ENSMUSG00000027474	1.22004	2.22488e-07	2.67735e-06	Ccm2l
ENSMUSG00000027487	-1.35949	4.49858e-05	0.00031395	Cdk5rap1
ENSMUSG00000027488	-1.34121	0.00245103	0.00972602	Snta1
ENSMUSG00000027514	1.74723	1.04659e-12	3.04767e-11	Zbp1
ENSMUSG00000027589	-1.10659	1.34872e-06	1.38597e-05	Pcmtd2
ENSMUSG00000027601	-1.1419	4.30315e-15	1.73148e-13	Mtfr1
ENSMUSG00000027646	-1.59571	0.00120927	0.0053507	Src
ENSMUSG00000027692	-2.4788	9.80297e-05	0.000617832	Tnik
ENSMUSG00000027737	-3.08782	9.70698e-35	1.71215e-32	Slc7a11
ENSMUSG00000027803	-1.57504	0.000276677	0.00152635	Wwtr1
ENSMUSG00000027858	-1.47001	1.35727e-13	4.61114e-12	Tspan2
ENSMUSG00000027863	-1.1335	0.00858803	0.0278889	Cd2
ENSMUSG00000027864	-3.05871	4.48542e-11	1.0425e-09	Ptgfrn
ENSMUSG00000027939	1.01175	0.000259448	0.00144242	Nup210l
ENSMUSG00000027952	1.02412	9.0702e-09	1.43827e-07	Pmvk
ENSMUSG00000027994	1.3488	0.0054474	0.0190341	Mcub
ENSMUSG00000027995	-1.55113	1.59989e-21	1.17046e-19	Tlr2
ENSMUSG00000028035	-1.06964	3.42092e-07	3.97902e-06	Dnajb4
ENSMUSG00000028108	3.51677	9.1189e-70	9.03192e-67	Ecm1
ENSMUSG00000028111	-1.87171	0.000577031	0.00285764	Ctsk
ENSMUSG00000028128	-1.1997	4.35306e-09	7.33639e-08	F3
ENSMUSG00000028199	2.19183	1.06045e-10	2.30647e-09	Cryz
ENSMUSG00000028207	-1.55639	2.29636e-05	0.000173013	Asph
ENSMUSG00000028214	-1.75898	2.25405e-05	0.000170049	Gem
ENSMUSG00000028234	1.10378	9.39916e-10	1.77454e-08	Rps20
ENSMUSG00000028238	-1.7552	0.00210855	0.00858917	Atp6v0d2
ENSMUSG00000028268	1.00867	0.000471732	0.0024008	Gbp3
ENSMUSG00000028270	1.65454	4.88101e-05	0.000336806	Gbp2
ENSMUSG00000028278	-1.61874	5.33611e-10	1.04737e-08	Rragd
ENSMUSG00000028328	-1.67418	0.00222305	0.0089956	Tmod1
ENSMUSG00000028339	-1.69231	0.00959379	0.0304936	Col15a1
ENSMUSG00000028341	-4.65895	6.57472e-05	0.000437092	Nr4a3
ENSMUSG00000028364	-2.82494	8.38631e-06	7.066e-05	Tnc
ENSMUSG00000028373	-3.17757	9.52595e-10	1.79584e-08	Astn2
ENSMUSG00000028412	-2.40875	8.81165e-26	9.37676e-24	Slc44a1
ENSMUSG00000028417	-1.27698	0.00246815	0.00978143	Tal2
ENSMUSG00000028431	-1.06947	8.303e-16	3.5911e-14	Ikbkap
ENSMUSG00000028434	-2.81297	2.84433e-06	2.68108e-05	Epb41l4b
ENSMUSG00000028459	-2.32056	1.31131e-08	2.00766e-07	Cd72
ENSMUSG00000028479	1.41755	8.25086e-15	3.21934e-13	Gne
ENSMUSG00000028497	-1.01412	1.58209e-08	2.37148e-07	Hacd4
ENSMUSG00000028514	1.28122	7.052e-18	3.60323e-16	Usp24
ENSMUSG00000028517	-1.88542	0.000142534	0.000860417	Plpp3
ENSMUSG00000028525	-2.69144	4.42014e-20	2.81751e-18	Pde4b
ENSMUSG00000028527	1.4182	0.0148171	0.0433013	Ak4
ENSMUSG00000028538	-1.22644	1.42653e-07	1.78851e-06	St3gal3
ENSMUSG00000028555	1.75958	8.64263e-06	7.24582e-05	Ttc39a
ENSMUSG00000028558	-3.74288	8.32904e-06	7.02783e-05	Calr4
ENSMUSG00000028573	3.76199	1.39347e-30	1.97169e-28	Fggy
ENSMUSG00000028576	1.17406	0.00690652	0.0231947	Ift74
ENSMUSG00000028655	1.092	0.000988488	0.0045118	Mfsd2a
ENSMUSG00000028680	-1.40743	5.86257e-23	4.93376e-21	Plk3
ENSMUSG00000028687	1.05205	0.00113825	0.00509421	Mutyh
ENSMUSG00000028713	-3.11952	0.00036896	0.00195599	Cyp4b1
ENSMUSG00000028716	-1.68386	0.00126722	0.00557073	Pdzk1ip1
ENSMUSG00000028763	-3.0107	2.17488e-08	3.1324e-07	Hspg2
ENSMUSG00000028789	2.21357	2.80273e-15	1.16413e-13	Azin2
ENSMUSG00000028798	1.02907	7.53874e-08	1.00071e-06	Eif3i
ENSMUSG00000028859	-2.11276	3.76713e-47	1.42664e-44	Csf3r
ENSMUSG00000028862	1.5996	0.000686174	0.00330658	Map3k6
ENSMUSG00000028864	-1.70132	5.2117e-19	3.02278e-17	Hgf
ENSMUSG00000028893	-1.08155	6.47993e-17	3.13667e-15	Sesn2
ENSMUSG00000028910	1.01826	0.00042157	0.00218216	Mecr
ENSMUSG00000028927	-1.50311	2.39462e-06	2.29409e-05	Padi2
ENSMUSG00000028973	1.35305	2.15221e-09	3.81181e-08	Abcb8
ENSMUSG00000028982	-2.0521	2.03869e-24	1.93016e-22	Slc25a33
ENSMUSG00000028988	1.1406	2.76399e-12	7.57444e-11	Ctnnbip1
ENSMUSG00000029059	-1.44067	3.58808e-05	0.00025681	Fam213b
ENSMUSG00000029084	3.24309	1.18652e-57	6.11108e-55	Cd38
ENSMUSG00000029166	-1.81678	0.0053394	0.0187177	Mapre3
ENSMUSG00000029217	-1.13809	6.19003e-14	2.17174e-12	Tec
ENSMUSG00000029287	1.01847	5.41589e-05	0.000368384	Tgfbr3
ENSMUSG00000029298	1.3506	0.00251089	0.00992111	Gbp9
ENSMUSG00000029299	-1.00085	0.00724894	0.0241431	Abcg3
ENSMUSG00000029304	-1.28944	9.01977e-11	1.99551e-09	Spp1
ENSMUSG00000029306	-3.47824	2.1234e-05	0.000161612	Ibsp
ENSMUSG00000029322	1.34119	2.75239e-13	8.85995e-12	Plac8
ENSMUSG00000029330	2.17138	4.2402e-05	0.000298343	Cds1
ENSMUSG00000029359	1.26689	3.36205e-09	5.79515e-08	Tesc
ENSMUSG00000029366	-1.56355	4.51348e-18	2.36242e-16	Dck
ENSMUSG00000029372	-3.06302	7.62086e-12	1.99443e-10	Ppbp
ENSMUSG00000029373	-1.91615	3.49648e-05	0.000251091	Pf4
ENSMUSG00000029379	-2.52916	1.02762e-16	4.86458e-15	Cxcl3
ENSMUSG00000029380	-2.57739	1.55039e-14	5.87143e-13	Cxcl1
ENSMUSG00000029438	-2.04927	9.88347e-07	1.04494e-05	Bcl7a
ENSMUSG00000029440	1.40936	6.78016e-16	2.97957e-14	Psmd9
ENSMUSG00000029490	2.84498	1.3423e-12	3.88391e-11	Mfsd7a
ENSMUSG00000029507	1.06759	6.84304e-05	0.000452083	Pus1
ENSMUSG00000029510	-1.18605	3.8752e-05	0.000275523	Gpc2
ENSMUSG00000029530	-2.83643	6.23795e-10	1.206e-08	Ccr9
ENSMUSG00000029564	-1.738	1.57933e-08	2.37009e-07	4930519G04Rik
ENSMUSG00000029648	1.07363	0.000775432	0.00366778	Flt1
ENSMUSG00000029661	-1.98236	7.77665e-05	0.000507255	Col1a2
ENSMUSG00000029718	-1.18292	0.000476426	0.0024161	Pcolce
ENSMUSG00000029761	-2.23082	3.73193e-05	0.000266071	Cald1
ENSMUSG00000029772	-1.04096	7.94278e-07	8.5726e-06	Ahcyl2
ENSMUSG00000029780	1.21524	7.07774e-17	3.41322e-15	Nt5c3
ENSMUSG00000029816	1.9762	0.000805609	0.00378854	Gpnmb
ENSMUSG00000029925	-1.4267	4.66567e-27	5.26975e-25	Tbxas1
ENSMUSG00000030054	-1.84488	1.05502e-06	1.10984e-05	Gp9
ENSMUSG00000030109	-1.0978	9.50786e-11	2.09629e-09	Slc6a12
ENSMUSG00000030110	-1.31415	0.00369115	0.0137085	Ret
ENSMUSG00000030122	-1.30052	3.80545e-23	3.28852e-21	Ptms
ENSMUSG00000030126	-1.14577	5.98943e-19	3.44285e-17	Tmcc1
ENSMUSG00000030134	-1.92381	3.16601e-05	0.000229159	Rasgef1a
ENSMUSG00000030142	-1.09787	3.42133e-11	8.05358e-10	Clec4e
ENSMUSG00000030144	-2.33655	1.53879e-63	1.10075e-60	Clec4d
ENSMUSG00000030159	-1.57535	8.60367e-12	2.23348e-10	Clec1b
ENSMUSG00000030162	-1.0649	4.65956e-07	5.29069e-06	Olr1
ENSMUSG00000030188	1.0506	9.72584e-06	8.03271e-05	Magohb
ENSMUSG00000030203	-1.16414	0.000206287	0.0011842	Dusp16
ENSMUSG00000030223	1.00526	0.00120051	0.00532477	Ptpro
ENSMUSG00000030249	-4.54582	1.8011e-08	2.65951e-07	Abcc9
ENSMUSG00000030257	-1.18115	0.00923671	0.0295777	Srgap3
ENSMUSG00000030272	-1.04383	4.19597e-20	2.68792e-18	Camk1
ENSMUSG00000030283	1.30965	0.000514243	0.00258749	St8sia1
ENSMUSG00000030313	-2.86042	2.80354e-05	0.000205351	Dennd5b
ENSMUSG00000030340	-1.35695	3.82056e-20	2.45968e-18	Scnn1a
ENSMUSG00000030352	-2.4045	0.000696495	0.00334754	Tspan9
ENSMUSG00000030365	1.2061	0.000915187	0.00422667	Clec2i
ENSMUSG00000030380	1.22566	5.29347e-05	0.000361201	Mzf1
ENSMUSG00000030409	-1.02468	1.57671e-07	1.95962e-06	Dmpk
ENSMUSG00000030468	-1.64846	9.01296e-22	6.74714e-20	Siglecg
ENSMUSG00000030498	1.15552	7.99496e-05	0.00051939	Gas2
ENSMUSG00000030545	1.30407	0.00029071	0.00159285	Pex11a
ENSMUSG00000030560	1.3828	1.53228e-12	4.37464e-11	Ctsc
ENSMUSG00000030592	1.70027	1.13943e-13	3.93331e-12	Ryr1
ENSMUSG00000030630	2.19921	1.69043e-06	1.69385e-05	Fah
ENSMUSG00000030691	-1.2036	9.93678e-13	2.91449e-11	Fchsd2
ENSMUSG00000030699	-2.15075	1.49479e-16	6.99888e-15	Tbx6
ENSMUSG00000030711	1.33403	0.00121403	0.00536868	Sult1a1
ENSMUSG00000030717	1.42631	0.000509632	0.0025673	Nupr1
ENSMUSG00000030724	-1.2596	0.0001137	0.000705543	Cd19
ENSMUSG00000030729	-1.0361	0.00757404	0.0250188	Pgm2l1
ENSMUSG00000030782	-1.61342	0.00654446	0.0221754	Tgfb1i1
ENSMUSG00000030785	-3.48922	4.64736e-06	4.19631e-05	Cox6a2
ENSMUSG00000030787	-1.8463	2.29543e-08	3.30234e-07	Lyve1
ENSMUSG00000030789	-3.30848	1.32621e-45	4.74339e-43	Itgax
ENSMUSG00000030793	1.34456	1.78739e-18	9.90545e-17	Pycard
ENSMUSG00000030838	1.67412	9.75069e-11	2.14615e-09	Ush1c
ENSMUSG00000030851	-1.23338	0.00152963	0.00654119	Ldhc
ENSMUSG00000030865	-2.32344	7.63804e-06	6.51307e-05	Chp2
ENSMUSG00000030882	-1.25105	0.00423828	0.0153936	Dnhd1
ENSMUSG00000030897	1.2239	1.15355e-06	1.19977e-05	Cnga4
ENSMUSG00000030917	-2.59147	4.43182e-33	7.04495e-31	Tmem159
ENSMUSG00000030966	1.03254	3.43795e-13	1.09032e-11	Trim21
ENSMUSG00000031024	-3.189	3.06899e-05	0.000222879	St5
ENSMUSG00000031097	-1.54724	0.000743001	0.00353674	Tnni2
ENSMUSG00000031129	-2.25801	3.81885e-24	3.53752e-22	Slc9a9
ENSMUSG00000031144	-1.63933	1.23104e-06	1.27418e-05	Syp
ENSMUSG00000031149	-1.15471	0.0114503	0.0351116	Praf2
ENSMUSG00000031167	1.25892	2.07275e-19	1.23559e-17	Rbm3
ENSMUSG00000031189	-1.58262	8.57686e-08	1.12689e-06	Aff2
ENSMUSG00000031217	-1.06983	0.00190143	0.00788749	Efnb1
ENSMUSG00000031227	-1.66048	0.00300188	0.0114865	Magee1
ENSMUSG00000031266	-1.22428	1.77151e-11	4.34475e-10	Gla
ENSMUSG00000031286	3.08328	9.63068e-08	1.25765e-06	Glt28d2
ENSMUSG00000031303	-1.08068	3.48314e-10	7.06282e-09	Map3k15
ENSMUSG00000031355	-1.88493	0.000311503	0.00168881	Arhgap6
ENSMUSG00000031375	-2.8437	2.16875e-13	7.10557e-12	Bgn
ENSMUSG00000031438	-2.74274	2.68223e-21	1.88723e-19	Rnf128
ENSMUSG00000031442	-1.21837	5.18751e-15	2.06794e-13	Mcf2l
ENSMUSG00000031444	1.52111	2.10696e-07	2.55214e-06	F10
ENSMUSG00000031451	-2.37512	1.33796e-05	0.000107672	Gas6
ENSMUSG00000031486	-1.3952	0.00774913	0.025473	Adgra2
ENSMUSG00000031497	-1.61198	4.98497e-25	5.05405e-23	Tnfsf13b
ENSMUSG00000031502	-2.26802	0.000223954	0.00127088	Col4a1
ENSMUSG00000031519	1.77063	0.00179234	0.00751244	Asb5
ENSMUSG00000031610	1.15943	6.79838e-10	1.30456e-08	Scrg1
ENSMUSG00000031647	-1.73539	5.73041e-07	6.38277e-06	Mfap3l
ENSMUSG00000031681	1.18282	2.13827e-08	3.08659e-07	Smad1
ENSMUSG00000031700	-1.66523	0.00282144	0.0109325	Gpt2
ENSMUSG00000031712	-2.53839	4.29333e-52	1.90624e-49	Il15
ENSMUSG00000031723	-1.10647	1.93304e-14	7.23542e-13	Txnl4b
ENSMUSG00000031740	-1.27064	3.1263e-07	3.65948e-06	Mmp2
ENSMUSG00000031762	2.29633	1.26114e-05	0.000101809	Mt2
ENSMUSG00000031765	1.24087	0.000156043	0.00093235	Mt1
ENSMUSG00000031767	-1.2517	8.32725e-15	3.23933e-13	Nudt7
ENSMUSG00000031791	-1.41326	4.30018e-28	5.12677e-26	Tmem38a
ENSMUSG00000031799	-1.33231	1.69549e-14	6.38337e-13	Tpm4
ENSMUSG00000031803	1.49869	5.60546e-07	6.25441e-06	B3gnt3
ENSMUSG00000031825	1.09112	7.05836e-09	1.14607e-07	Crispld2
ENSMUSG00000031838	1.04968	9.30836e-06	7.71761e-05	Ifi30
ENSMUSG00000031871	-3.67283	1.52477e-12	4.37408e-11	Cdh5
ENSMUSG00000031877	2.4946	4.75313e-28	5.56376e-26	Ces2g
ENSMUSG00000031886	2.59538	7.2124e-12	1.89138e-10	Ces2e
ENSMUSG00000031897	1.41738	3.7996e-09	6.47996e-08	Psmb10
ENSMUSG00000032009	-1.26855	1.538e-07	1.91521e-06	Sesn3
ENSMUSG00000032034	-2.38524	0.000880852	0.00408863	Kcnj5
ENSMUSG00000032036	-3.54564	4.40437e-05	0.000308621	Kirrel3
ENSMUSG00000032053	-1.77912	1.80528e-06	1.79774e-05	Pou2af1
ENSMUSG00000032089	-1.63971	1.23224e-13	4.20857e-12	Il10ra
ENSMUSG00000032094	-1.58943	4.27227e-17	2.10765e-15	Cd3d
ENSMUSG00000032122	-2.24191	3.14308e-36	6.04035e-34	Slc37a2
ENSMUSG00000032125	-2.7744	0.000666183	0.00322392	Robo4
ENSMUSG00000032192	1.7652	7.11278e-10	1.36083e-08	Gnb5
ENSMUSG00000032204	-2.01737	9.65633e-29	1.20713e-26	Aqp9
ENSMUSG00000032278	-1.1147	0.000698835	0.00335754	Paqr5
ENSMUSG00000032279	1.30439	1.84763e-13	6.13145e-12	Idh3a
ENSMUSG00000032298	-1.27443	0.000168502	0.000998908	Neil1
ENSMUSG00000032311	1.09725	2.67939e-07	3.17971e-06	Nrg4
ENSMUSG00000032352	-1.16023	0.000312468	0.00169261	Lrrc1
ENSMUSG00000032387	-2.43665	0.00182675	0.00763429	Rbpms2
ENSMUSG00000032420	-3.30472	2.66093e-40	6.46456e-38	Nt5e
ENSMUSG00000032487	-6.01528	5.74857e-176	7.40186e-172	Ptgs2
ENSMUSG00000032507	3.06318	4.33028e-13	1.33709e-11	Fbxl2
ENSMUSG00000032515	-1.20229	2.25636e-18	1.22586e-16	Csrnp1
ENSMUSG00000032518	1.23893	6.02745e-10	1.17235e-08	Rpsa
ENSMUSG00000032548	1.09886	0.00911175	0.0292357	Slco2a1
ENSMUSG00000032554	-1.40049	1.91887e-12	5.39461e-11	Trf
ENSMUSG00000032556	-1.65529	0.00346037	0.0129787	Bfsp2
ENSMUSG00000032575	1.23985	3.29923e-14	1.19328e-12	Manf
ENSMUSG00000032640	-1.40988	1.59903e-25	1.66042e-23	Chsy1
ENSMUSG00000032656	-1.0481	0.000908041	0.00419969	2021-03-03
ENSMUSG00000032691	-3.75897	5.83967e-44	1.97872e-41	Nlrp3
ENSMUSG00000032727	-1.00193	3.07948e-10	6.29388e-09	Mier3
ENSMUSG00000032733	-1.60344	5.38571e-06	4.77921e-05	Snx33
ENSMUSG00000032773	-1.54765	1.37346e-06	1.40914e-05	Chrm1
ENSMUSG00000032802	-1.01837	0.000904366	0.0041857	Srxn1
ENSMUSG00000032841	-5.31149	1.45362e-105	3.11946e-102	Prr5l
ENSMUSG00000032890	-1.43227	0.0115496	0.0353814	Rims3
ENSMUSG00000032915	-2.07763	1.12859e-14	4.31209e-13	Adgre4
ENSMUSG00000033032	2.72044	1.12334e-22	9.27191e-21	Afap1l1
ENSMUSG00000033083	-3.09659	4.75279e-08	6.55213e-07	Tbc1d4
ENSMUSG00000033105	1.64805	1.77002e-12	5.02e-11	Lss
ENSMUSG00000033174	-1.35025	7.73214e-20	4.80961e-18	Mgll
ENSMUSG00000033191	-1.81251	0.000238456	0.00134069	Tie1
ENSMUSG00000033287	1.23597	0.000182132	0.0010684	Kctd17
ENSMUSG00000033294	1.50014	5.52949e-18	2.85934e-16	Noc4l
ENSMUSG00000033295	-4.36338	4.79661e-05	0.000331515	Ptprf
ENSMUSG00000033316	1.8838	0.00173161	0.00728159	Galnt9
ENSMUSG00000033436	-1.87019	0.0008629	0.0040227	Armcx2
ENSMUSG00000033486	2.0057	8.47984e-06	7.1224e-05	Catsper2
ENSMUSG00000033488	-1.30389	1.13298e-15	4.86277e-14	Cryzl2
ENSMUSG00000033508	1.17359	6.08329e-10	1.18142e-08	Asprv1
ENSMUSG00000033577	-2.3466	4.34121e-07	4.95106e-06	Myo6
ENSMUSG00000033581	-1.49101	0.00270492	0.0105637	Igf2bp2
ENSMUSG00000033644	-1.00951	0.000459365	0.00234672	Piwil2
ENSMUSG00000033684	1.09753	1.08256e-14	4.14852e-13	Qsox1
ENSMUSG00000033688	-1.26303	0.0123043	0.0371988	1300017J02Rik
ENSMUSG00000033720	-1.21672	1.99585e-19	1.19528e-17	Sfxn5
ENSMUSG00000033730	-3.19271	2.58015e-41	7.06853e-39	Egr3
ENSMUSG00000033763	-1.20942	0.0167568	0.0478087	Mtss1l
ENSMUSG00000033769	-1.32033	1.24471e-09	2.29611e-08	Exoc6b
ENSMUSG00000033781	1.50975	0.00160097	0.00681009	Asb13
ENSMUSG00000033863	1.79338	1.39283e-09	2.56202e-08	Klf9
ENSMUSG00000033880	1.7486	1.26515e-15	5.37625e-14	Lgals3bp
ENSMUSG00000034055	-1.59946	0.00205833	0.00843508	Phka1
ENSMUSG00000034112	3.23264	0.000137944	0.000836238	Atp2c2
ENSMUSG00000034118	2.28967	8.49422e-22	6.47169e-20	Tpst1
ENSMUSG00000034121	1.22982	0.0081099	0.0265033	Mks1
ENSMUSG00000034160	-1.02427	1.25246e-07	1.58884e-06	Ogt
ENSMUSG00000034164	-3.04042	9.05766e-10	1.71762e-08	Emid1
ENSMUSG00000034171	-1.2635	0.00640679	0.0217662	Faah
ENSMUSG00000034177	-1.8399	0.000112572	0.000699555	Rnf43
ENSMUSG00000034201	-2.15344	3.37002e-09	5.80111e-08	Gas2l1
ENSMUSG00000034265	-1.37395	0.00876388	0.02831	Zdhhc14
ENSMUSG00000034292	1.52533	0.00179073	0.00750811	Traf3ip1
ENSMUSG00000034377	-1.03783	0.000207209	0.00118843	Tulp4
ENSMUSG00000034382	1.6918	0.00533691	0.0187141	AI661453
ENSMUSG00000034438	2.25195	0.00342644	0.0128664	Gbp8
ENSMUSG00000034459	1.27451	5.31118e-08	7.24436e-07	Ifit1
ENSMUSG00000034471	-1.55298	0.00272524	0.0106237	Caskin2
ENSMUSG00000034570	1.0825	1.46445e-11	3.66244e-10	Inpp5j
ENSMUSG00000034614	2.99886	1.55141e-09	2.81926e-08	Pik3ip1
ENSMUSG00000034634	-2.27881	3.58133e-12	9.68766e-11	Ly6d
ENSMUSG00000034641	-1.70962	2.31916e-41	6.49165e-39	Cd300ld
ENSMUSG00000034652	-1.24375	6.51249e-40	1.52463e-37	Cd300a
ENSMUSG00000034664	-1.33691	1.57731e-05	0.000124141	Itga2b
ENSMUSG00000034714	-1.02825	0.00256512	0.0100881	Ttyh2
ENSMUSG00000034730	3.13315	2.20797e-32	3.3845e-30	Adgrb1
ENSMUSG00000034765	-2.31223	1.63197e-18	9.09664e-17	Dusp5
ENSMUSG00000034845	-2.54212	0.00684719	0.0230435	Plvap
ENSMUSG00000034855	-1.37662	6.52807e-07	7.18423e-06	Cxcl10
ENSMUSG00000034926	2.8206	2.09196e-32	3.24531e-30	Dhcr24
ENSMUSG00000035000	-1.23383	0.00381103	0.0140644	Dpp4
ENSMUSG00000035049	1.04319	0.000137012	0.000832546	Rrp12
ENSMUSG00000035064	-1.08936	3.9444e-09	6.70912e-08	Eef2k
ENSMUSG00000035133	-3.96422	7.14042e-15	2.79453e-13	Arhgap5
ENSMUSG00000035142	1.3017	0.00429302	0.0155534	Nubpl
ENSMUSG00000035158	-1.75864	2.91303e-13	9.3304e-12	Mitf
ENSMUSG00000035236	-1.1443	8.25098e-05	0.000532797	Scai
ENSMUSG00000035273	1.45465	4.19755e-15	1.69428e-13	Hpse
ENSMUSG00000035298	2.3457	0.000232117	0.00131142	Klhl35
ENSMUSG00000035299	-2.0149	3.01447e-05	0.000219538	Mid1
ENSMUSG00000035356	-1.34034	2.27946e-07	2.72773e-06	Nfkbiz
ENSMUSG00000035385	1.45398	4.69369e-07	5.32007e-06	Ccl2
ENSMUSG00000035397	-1.02883	1.24175e-10	2.66036e-09	Klf16
ENSMUSG00000035448	-2.08024	1.80919e-08	2.66534e-07	Ccr3
ENSMUSG00000035459	-2.66393	2.82085e-09	4.91493e-08	Stab2
ENSMUSG00000035505	1.09598	2.10155e-07	2.54798e-06	Cox18
ENSMUSG00000035576	1.14032	0.0175846	0.0496643	L3mbtl1
ENSMUSG00000035640	-1.51711	6.5306e-05	0.000434788	Cbarp
ENSMUSG00000035678	-1.37916	0.0103798	0.0324883	Tnfsf9
ENSMUSG00000035783	-1.99457	4.19325e-18	2.20377e-16	Acta2
ENSMUSG00000035835	1.19034	2.66427e-05	0.000197043	Plppr3
ENSMUSG00000035847	-1.06149	1.71885e-06	1.71832e-05	Ids
ENSMUSG00000035983	-1.03472	0.000486198	0.0024608	Gm7008
ENSMUSG00000036053	-1.59532	5.16891e-10	1.01611e-08	Fmnl2
ENSMUSG00000036067	-2.66067	2.75494e-69	2.53376e-66	Slc2a6
ENSMUSG00000036091	-1.81446	0.00407907	0.0149296	Hyal3
ENSMUSG00000036136	1.55426	3.52634e-05	0.000252954	Fam110c
ENSMUSG00000036181	-1.36831	1.18386e-23	1.05857e-21	Hist1h1c
ENSMUSG00000036256	-2.49871	1.60781e-08	2.40164e-07	Igfbp7
ENSMUSG00000036327	1.05714	2.16115e-07	2.61041e-06	Qsox2
ENSMUSG00000036390	-1.25529	1.01804e-10	2.2331e-09	Gadd45a
ENSMUSG00000036478	-1.4377	1.50893e-21	1.11023e-19	Btg1
ENSMUSG00000036553	1.67102	1.94351e-30	2.65019e-28	Sh3tc1
ENSMUSG00000036613	1.26751	4.90365e-13	1.49266e-11	Eipr1
ENSMUSG00000036622	1.47778	4.86785e-21	3.35179e-19	Atp13a2
ENSMUSG00000036764	1.62055	5.43518e-10	1.0652e-08	Dnajc12
ENSMUSG00000036898	-1.38259	2.90957e-10	5.96555e-09	Zfp157
ENSMUSG00000036902	-1.21698	6.26963e-05	0.000419365	Neto2
ENSMUSG00000036931	-1.59843	2.26831e-20	1.49014e-18	Nfkbid
ENSMUSG00000036941	1.0868	1.36406e-11	3.43039e-10	Elac1
ENSMUSG00000037010	-1.28468	2.19451e-05	0.000166117	Apln
ENSMUSG00000037014	-3.002	0.000106123	0.000664933	Sstr4
ENSMUSG00000037095	1.30614	1.05002e-08	1.64677e-07	Lrg1
ENSMUSG00000037124	-2.11466	0.000529689	0.00265587	Trim58
ENSMUSG00000037126	-1.21388	4.20246e-07	4.80558e-06	Psd
ENSMUSG00000037138	-2.18783	2.43677e-11	5.86466e-10	Aff3
ENSMUSG00000037185	-2.43662	8.80292e-50	3.54207e-47	Krt80
ENSMUSG00000037217	-3.49102	5.73093e-20	3.61723e-18	Syn1
ENSMUSG00000037251	-1.15483	0.000217618	0.00124039	Pomk
ENSMUSG00000037263	-1.96154	6.96708e-27	7.73346e-25	Aldh3b3
ENSMUSG00000037321	1.0133	7.21981e-10	1.37926e-08	Tap1
ENSMUSG00000037336	-1.09319	0.00772025	0.0254105	Mfsd2b
ENSMUSG00000037363	-1.14343	8.32218e-09	1.33445e-07	Letm2
ENSMUSG00000037418	-1.9878	1.53181e-07	1.90935e-06	Best1
ENSMUSG00000037432	-1.00242	1.4454e-07	1.80865e-06	Fer1l5
ENSMUSG00000037605	-1.82509	0.00100097	0.0045639	Adgrl3
ENSMUSG00000037664	2.26547	3.26828e-06	3.03406e-05	Cdkn1c
ENSMUSG00000037692	-1.26189	6.29196e-05	0.000420422	Ahdc1
ENSMUSG00000037759	-1.07892	8.26353e-11	1.84391e-09	Ptger2
ENSMUSG00000037771	-3.69271	1.71404e-19	1.03131e-17	Slc32a1
ENSMUSG00000037805	1.26102	1.06227e-10	2.30654e-09	Rpl10a
ENSMUSG00000037816	1.26706	2.06474e-16	9.46105e-15	Fbxw17
ENSMUSG00000037820	-1.60096	1.67057e-11	4.11286e-10	Tgm2
ENSMUSG00000037849	1.9331	1.32517e-08	2.02406e-07	Ifi206
ENSMUSG00000037860	-1.36977	6.57718e-07	7.23124e-06	Aim2
ENSMUSG00000037868	-1.64022	3.32254e-15	1.3668e-13	Egr2
ENSMUSG00000037872	-2.06886	0.0038158	0.014074	Ackr1
ENSMUSG00000037890	1.62278	6.65745e-10	1.28134e-08	Wdr19
ENSMUSG00000037922	-1.2539	7.71723e-12	2.01556e-10	Bank1
ENSMUSG00000037940	-1.21416	0.00253769	0.0100108	Inpp4b
ENSMUSG00000037966	-1.5626	8.29546e-28	9.62273e-26	Ninj1
ENSMUSG00000037992	-1.28777	1.41732e-28	1.72164e-26	Rara
ENSMUSG00000038037	1.23673	3.67141e-13	1.14741e-11	Socs1
ENSMUSG00000038065	-2.14566	1.19628e-11	3.03813e-10	Mturn
ENSMUSG00000038147	-1.27792	2.53389e-15	1.06117e-13	Cd84
ENSMUSG00000038151	-1.02995	0.0104176	0.0325892	Prdm1
ENSMUSG00000038156	1.81234	0.00122584	0.00540697	Spon1
ENSMUSG00000038170	-1.71682	5.10185e-18	2.64885e-16	Pde4dip
ENSMUSG00000038175	-1.01806	2.86606e-16	1.29033e-14	Mylip
ENSMUSG00000038205	-1.32693	6.7188e-06	5.81784e-05	Prkab2
ENSMUSG00000038235	4.74359	5.91777e-61	3.62844e-58	F11r
ENSMUSG00000038244	-1.66185	6.90014e-05	0.000454922	Mical2
ENSMUSG00000038264	-2.04363	8.98848e-40	2.06671e-37	Sema7a
ENSMUSG00000038352	-1.74061	3.61388e-05	0.000258369	Arl5c
ENSMUSG00000038368	-1.19843	0.000194849	0.0011286	Focad
ENSMUSG00000038370	2.07799	5.40552e-05	0.000368067	Pcp4l1
ENSMUSG00000038372	1.5177	4.65033e-13	1.42566e-11	Gmds
ENSMUSG00000038418	-2.67905	1.11627e-40	2.93329e-38	Egr1
ENSMUSG00000038421	-2.45389	9.12564e-11	2.01547e-09	Fcrla
ENSMUSG00000038507	1.7906	1.82255e-21	1.31101e-19	Parp12
ENSMUSG00000038550	-2.14759	4.31821e-10	8.58044e-09	Ciart
ENSMUSG00000038587	-5.63428	1.36392e-17	6.86007e-16	Akap12
ENSMUSG00000038642	1.24014	2.5696e-10	5.31078e-09	Ctss
ENSMUSG00000038679	-2.21332	3.16218e-28	3.80526e-26	Trps1
ENSMUSG00000038725	-2.35628	9.69578e-06	8.01393e-05	Pkhd1l1
ENSMUSG00000038764	2.75819	7.56199e-21	5.15175e-19	Ptpn3
ENSMUSG00000038811	-1.18007	5.36242e-06	4.76183e-05	Gngt2
ENSMUSG00000038836	1.74225	0.00189419	0.00786508	Agbl3
ENSMUSG00000038843	-1.09723	4.28139e-07	4.88716e-06	Gcnt1
ENSMUSG00000038900	1.03948	5.11364e-07	5.75552e-06	Rpl12
ENSMUSG00000038954	-1.3103	1.9138e-08	2.80343e-07	Supt3
ENSMUSG00000038963	-1.09234	1.91242e-08	2.80343e-07	Slco4a1
ENSMUSG00000038967	-1.10171	0.000165453	0.000981738	Pdk2
ENSMUSG00000039007	1.91816	8.04149e-23	6.72352e-21	Cpq
ENSMUSG00000039013	-1.30561	8.99475e-17	4.27367e-15	Siglec5
ENSMUSG00000039031	-1.67504	1.79246e-18	9.90545e-17	Arhgap18
ENSMUSG00000039062	1.16981	0.00322808	0.0122249	Anpep
ENSMUSG00000039081	-1.51002	3.05728e-05	0.000222153	Zfp503
ENSMUSG00000039109	3.70892	8.43678e-20	5.1977e-18	F13a1
ENSMUSG00000039116	-1.1796	0.00467523	0.0166754	Adgrg6
ENSMUSG00000039153	-1.42861	1.20836e-13	4.13798e-12	Runx2
ENSMUSG00000039166	-1.03782	3.53774e-05	0.00025363	Akap7
ENSMUSG00000039167	-1.13449	2.49264e-06	2.37918e-05	Adgrl4
ENSMUSG00000039197	-1.16888	1.11705e-06	1.16746e-05	Adk
ENSMUSG00000039208	-1.16821	1.04167e-09	1.93822e-08	Metrnl
ENSMUSG00000039230	1.12342	6.03017e-14	2.12143e-12	Tbcd
ENSMUSG00000039234	1.52603	2.39805e-09	4.21821e-08	Sec24d
ENSMUSG00000039474	1.62066	5.2964e-06	4.71296e-05	Wfs1
ENSMUSG00000039542	-1.43319	1.29784e-27	1.49206e-25	Ncam1
ENSMUSG00000039652	-1.39477	0.0024745	0.00980278	Cpeb3
ENSMUSG00000039682	1.63034	2.11789e-06	2.05826e-05	Lap3
ENSMUSG00000039699	4.30558	7.16335e-30	9.13221e-28	Batf2
ENSMUSG00000039715	1.61243	0.000186352	0.00108721	Wdr34
ENSMUSG00000039735	-2.55114	2.46269e-18	1.31575e-16	Fnbp1l
ENSMUSG00000039759	-1.23453	7.09286e-07	7.72654e-06	Thap3
ENSMUSG00000039783	-3.05956	9.64614e-07	1.02478e-05	Kmo
ENSMUSG00000039899	-1.24178	5.69014e-15	2.24743e-13	Fgl2
ENSMUSG00000039908	-1.07465	2.12241e-13	6.97147e-12	Slc26a11
ENSMUSG00000039942	-2.34268	1.13111e-63	8.56719e-61	Ptger4
ENSMUSG00000039956	1.87831	0.0043499	0.0157173	Mrap
ENSMUSG00000040009	-3.10074	0.000118069	0.000729138	Gnaz
ENSMUSG00000040010	1.63737	1.17189e-14	4.46427e-13	Slc7a5
ENSMUSG00000040026	3.07425	8.13881e-08	1.07372e-06	Saa3
ENSMUSG00000040033	1.40562	5.08265e-27	5.6908e-25	Stat2
ENSMUSG00000040040	1.38142	7.72033e-05	0.000504092	Ift88
ENSMUSG00000040093	-1.19651	2.01575e-05	0.000154585	Bmf
ENSMUSG00000040097	1.04424	1.06388e-08	1.66649e-07	Flywch1
ENSMUSG00000040152	-5.58103	1.46825e-39	3.25952e-37	Thbs1
ENSMUSG00000040209	-1.18657	0.000393357	0.00206183	Zfp704
ENSMUSG00000040213	2.07423	1.2423e-11	3.1426e-10	Kyat3
ENSMUSG00000040253	1.45131	0.0010292	0.00467279	Gbp7
ENSMUSG00000040264	2.7061	0.0109432	0.0338794	Gbp2b
ENSMUSG00000040270	-2.56695	7.50389e-11	1.68621e-09	Bach2
ENSMUSG00000040272	1.07271	0.00599685	0.0206569	Accs
ENSMUSG00000040283	1.36238	3.54553e-13	1.11735e-11	Btnl9
ENSMUSG00000040314	1.37598	0.00389172	0.014313	Ctsg
ENSMUSG00000040327	1.14042	3.40173e-05	0.000245245	Cul9
ENSMUSG00000040328	2.23773	7.23897e-11	1.63525e-09	Olfr56
ENSMUSG00000040339	-1.68639	3.25318e-11	7.68586e-10	Fam102b
ENSMUSG00000040435	-1.70181	6.80915e-30	8.76746e-28	Ppp1r15a
ENSMUSG00000040483	1.48464	1.80725e-10	3.81477e-09	Xaf1
ENSMUSG00000040522	-1.14281	2.88806e-05	0.000211048	Tlr8
ENSMUSG00000040554	1.69449	2.51181e-05	0.000187164	Aipl1
ENSMUSG00000040563	-1.18321	0.000497346	0.0025113	Plppr2
ENSMUSG00000040592	-1.24135	5.31098e-05	0.000362013	Cd79b
ENSMUSG00000040631	-1.49466	3.19967e-09	5.54494e-08	Dok4
ENSMUSG00000040703	3.5961	3.19595e-06	2.97549e-05	Cyp2s1
ENSMUSG00000040710	-3.30716	7.59932e-50	3.15641e-47	St8sia4
ENSMUSG00000040713	-1.25775	1.02111e-21	7.59992e-20	Creg1
ENSMUSG00000040721	-1.50758	0.000422871	0.00218758	Zfhx2
ENSMUSG00000040746	-1.0634	1.43303e-17	7.17964e-16	Rnf167
ENSMUSG00000040809	1.08543	2.2399e-31	3.24055e-29	Chil3
ENSMUSG00000040820	-1.20355	2.08916e-22	1.70253e-20	Hlcs
ENSMUSG00000040848	-1.05397	2.48466e-16	1.12649e-14	Sft2d2
ENSMUSG00000040855	-3.37074	1.14419e-09	2.11699e-08	Reps2
ENSMUSG00000040929	-1.00523	1.44447e-05	0.000115164	Rfx3
ENSMUSG00000040952	1.17536	1.24473e-10	2.66232e-09	Rps19
ENSMUSG00000040964	1.31368	0.00236072	0.00944318	Arhgef10l
ENSMUSG00000041012	-1.77823	6.30429e-05	0.000421027	Cmtm8
ENSMUSG00000041073	-1.66435	2.59808e-09	4.55762e-08	Nacad
ENSMUSG00000041115	1.6597	6.22607e-14	2.17845e-12	Iqsec2
ENSMUSG00000041143	1.26423	5.69755e-14	2.00991e-12	Tmco4
ENSMUSG00000041220	1.34047	6.15263e-05	0.000413041	Elovl6
ENSMUSG00000041362	1.71236	0.000369141	0.00195599	Shtn1
ENSMUSG00000041378	-3.50317	1.28278e-05	0.000103426	Cldn5
ENSMUSG00000041445	-3.63287	1.14416e-06	1.19193e-05	Mmrn2
ENSMUSG00000041481	2.07872	0.000151484	0.000910123	Serpina3g
ENSMUSG00000041570	-1.40242	3.7002e-06	3.39585e-05	Camsap2
ENSMUSG00000041608	1.39178	0.00424917	0.015425	Entpd3
ENSMUSG00000041609	1.23913	4.47058e-05	0.000312504	Bicdl1
ENSMUSG00000041736	1.09978	1.03672e-09	1.9318e-08	Tspo
ENSMUSG00000041762	-1.47207	0.00430772	0.0155979	Gpr155
ENSMUSG00000041797	-1.0916	0.00335793	0.0126497	Abca9
ENSMUSG00000041842	-1.47058	0.00115217	0.00514047	Fhdc1
ENSMUSG00000041939	1.93437	6.40222e-16	2.84259e-14	Mvk
ENSMUSG00000041949	-1.24085	6.16065e-17	2.99338e-15	Tango6
ENSMUSG00000042010	1.76884	0.0117464	0.035849	Acacb
ENSMUSG00000042106	-1.28361	0.00228441	0.00918329	Fam212a
ENSMUSG00000042269	-1.81862	0.000101611	0.000638527	Fam92b
ENSMUSG00000042272	1.52644	0.00420602	0.0153016	Sestd1
ENSMUSG00000042286	-1.10751	3.27986e-06	3.04043e-05	Stab1
ENSMUSG00000042351	-1.45344	0.000248247	0.00138794	Grap2
ENSMUSG00000042453	-1.79176	0.00198572	0.00818749	Reln
ENSMUSG00000042622	-1.27896	2.19748e-06	2.12652e-05	Maff
ENSMUSG00000042675	-1.19066	3.77062e-29	4.75985e-27	Ypel3
ENSMUSG00000042677	-1.62747	4.21234e-14	1.50244e-12	Zc3h12a
ENSMUSG00000042784	2.01724	0.00018288	0.00107132	Muc1
ENSMUSG00000042807	-1.38255	3.68801e-06	3.38708e-05	Hecw2
ENSMUSG00000042810	-2.57637	0.000261965	0.00145328	Krba1
ENSMUSG00000043008	1.09937	2.80014e-20	1.81179e-18	Klhl6
ENSMUSG00000043067	1.02037	2.52574e-09	4.43675e-08	Dpy19l1
ENSMUSG00000043099	-1.49262	0.00350419	0.0131191	Hic1
ENSMUSG00000043110	1.05229	0.00723637	0.0241075	Lrrn4
ENSMUSG00000043183	-1.41006	1.06866e-06	1.12144e-05	Simc1
ENSMUSG00000043243	-2.97682	1.28431e-10	2.74242e-09	Fam129c
ENSMUSG00000043263	1.10669	0.000537363	0.00268702	Ifi209
ENSMUSG00000043415	-1.18608	9.20506e-09	1.45786e-07	Otud1
ENSMUSG00000043421	-1.04316	1.65775e-05	0.000130233	Hilpda
ENSMUSG00000043488	-2.07879	0.000660026	0.00319853	Frmd8os
ENSMUSG00000043592	3.26008	1.77963e-08	2.63083e-07	Unc5cl
ENSMUSG00000043953	-2.954	5.39999e-39	1.12146e-36	Ccrl2
ENSMUSG00000044103	-1.68447	9.91293e-21	6.64786e-19	Il1f9
ENSMUSG00000044167	-1.34194	9.64876e-05	0.000610336	Foxo1
ENSMUSG00000044244	1.01731	4.38443e-05	0.000307651	Il20rb
ENSMUSG00000044258	-1.37389	0.00194684	0.00806549	Ctla2a
ENSMUSG00000044328	-1.61123	1.61132e-14	6.08425e-13	Trp53i13
ENSMUSG00000044352	-2.44581	3.60404e-05	0.000257809	Sowaha
ENSMUSG00000044562	-3.31039	2.60606e-33	4.19445e-31	Rasip1
ENSMUSG00000044583	1.45337	9.87898e-07	1.04494e-05	Tlr7
ENSMUSG00000044707	4.6208	1.05715e-14	4.06323e-13	Ccnjl
ENSMUSG00000044786	-1.5387	1.80747e-56	8.95117e-54	Zfp36
ENSMUSG00000045092	-1.61822	3.60106e-10	7.27901e-09	S1pr1
ENSMUSG00000045094	2.20938	2.15397e-08	3.10577e-07	Arhgef37
ENSMUSG00000045136	-4.21937	2.87314e-07	3.39089e-06	Tubb2b
ENSMUSG00000045140	1.06871	0.0139839	0.0413734	Pigw
ENSMUSG00000045502	-3.01344	1.4829e-60	8.67902e-58	Hcar2
ENSMUSG00000045538	1.05127	6.0893e-06	5.32286e-05	Ddx28
ENSMUSG00000045573	-1.13573	0.000666518	0.00322392	Penk
ENSMUSG00000045664	-1.88335	1.04855e-12	3.04767e-11	Cdc42ep2
ENSMUSG00000045763	-2.05985	1.01984e-38	2.08435e-36	Basp1
ENSMUSG00000045777	1.13314	1.41806e-07	1.7831e-06	Ifitm10
ENSMUSG00000045868	1.5388	0.00254475	0.0100308	Gvin1
ENSMUSG00000045954	-2.17791	5.13308e-05	0.000351936	Cavin2
ENSMUSG00000046031	1.6635	9.7798e-07	1.03727e-05	Fam26f
ENSMUSG00000046080	-1.47422	0.0103746	0.0324883	Clec9a
ENSMUSG00000046101	-1.71243	0.00430943	0.0155997	Mcmdc2
ENSMUSG00000046159	-1.13942	4.70965e-10	9.30083e-09	Chrm3
ENSMUSG00000046329	-2.11946	0.000300794	0.00163626	Slc25a23
ENSMUSG00000046410	1.14715	4.72749e-22	3.71166e-20	Kcnk6
ENSMUSG00000046442	-1.16408	0.00662223	0.0224094	Ppm1e
ENSMUSG00000046463	-4.6734	3.18645e-08	4.49485e-07	5930403N24Rik
ENSMUSG00000046668	-1.80779	5.0536e-05	0.000347226	Cxxc5
ENSMUSG00000046718	1.29989	8.10595e-08	1.07048e-06	Bst2
ENSMUSG00000046727	-1.25269	0.000666434	0.00322392	Cystm1
ENSMUSG00000046807	1.09913	4.02983e-10	8.05716e-09	Lrrc75b
ENSMUSG00000046814	2.67034	0.00107057	0.004835	Gchfr
ENSMUSG00000046879	1.50775	4.39895e-12	1.17269e-10	Irgm1
ENSMUSG00000047146	-2.33387	3.31472e-06	3.06832e-05	Tet1
ENSMUSG00000047180	-1.47805	8.85856e-55	4.22455e-52	Neurl3
ENSMUSG00000047227	-1.45034	0.00305181	0.0116533	Gm527
ENSMUSG00000047246	-1.32523	4.02047e-10	8.05094e-09	Hist1h2be
ENSMUSG00000047293	5.1704	8.14525e-25	7.94532e-23	Gpr15
ENSMUSG00000047407	-1.21447	0.0119445	0.0363245	Tgif1
ENSMUSG00000047443	2.45201	0.000369068	0.00195599	Erfe
ENSMUSG00000047583	2.14033	2.68102e-19	1.57629e-17	Tyw3
ENSMUSG00000047669	1.2239	0.00501337	0.0177341	Msl3l2
ENSMUSG00000047671	-1.52702	0.000525889	0.0026399	Tctex1d4
ENSMUSG00000047676	1.04219	0.00120567	0.00534212	Rpsa-ps10
ENSMUSG00000047766	-2.03669	8.17332e-05	0.000528842	Lrrc49
ENSMUSG00000047793	-1.56595	6.45995e-06	5.61023e-05	Sned1
ENSMUSG00000047945	-1.22351	1.93172e-09	3.44976e-08	Marcksl1
ENSMUSG00000047953	-2.43764	5.05734e-05	0.000347298	Gp5
ENSMUSG00000048027	1.71476	0.0113554	0.0348788	Rgmb
ENSMUSG00000048142	-1.33632	2.55044e-11	6.10398e-10	Nat8l
ENSMUSG00000048240	1.09415	1.59957e-05	0.000125816	Gng7
ENSMUSG00000048329	1.10835	4.63107e-05	0.000322323	Mfsd6l
ENSMUSG00000048480	-2.64828	8.62156e-17	4.11153e-15	Cxcr1
ENSMUSG00000048534	-3.53549	4.93911e-61	3.1798e-58	Jaml
ENSMUSG00000048612	2.22485	5.80625e-25	5.84073e-23	Myof
ENSMUSG00000048763	-1.21714	0.00041047	0.00213379	Hoxb3
ENSMUSG00000048794	-2.11389	0.000161245	0.000959166	Cfap100
ENSMUSG00000048827	-1.77363	5.62865e-08	7.65307e-07	Pkd1l3
ENSMUSG00000048852	1.53535	0.000219239	0.00124798	Gm12185
ENSMUSG00000048895	-1.09953	5.01965e-09	8.38301e-08	Cdk5r1
ENSMUSG00000049422	-1.58853	9.11122e-05	0.000580772	Chchd10
ENSMUSG00000049608	-1.63138	0.00288618	0.0111368	Gpr55
ENSMUSG00000049625	1.22248	1.90414e-05	0.0001469	Tifab
ENSMUSG00000049653	-2.29896	8.08944e-38	1.60246e-35	Spatc1
ENSMUSG00000049676	2.10496	0.000978043	0.00447523	Catsperg1
ENSMUSG00000049694	-2.14837	0.000215871	0.00123153	BC048671
ENSMUSG00000049751	1.21734	1.88725e-10	3.96415e-09	Rpl36al
ENSMUSG00000049811	-2.34678	1.88029e-05	0.000145409	Fam161a
ENSMUSG00000049858	-1.57786	0.000225109	0.00127631	Suox
ENSMUSG00000049866	-3.01422	4.55958e-43	1.39784e-40	Arl4c
ENSMUSG00000049882	3.26875	2.24719e-15	9.45583e-14	Vcpkmt
ENSMUSG00000050022	-1.84713	3.49555e-05	0.000251091	Amz1
ENSMUSG00000050147	-1.08997	0.0121904	0.0369153	F2rl3
ENSMUSG00000050157	-1.95806	0.00907059	0.0291327	Gm867
ENSMUSG00000050212	-1.7067	7.81861e-06	6.65823e-05	Eva1b
ENSMUSG00000050600	-1.68628	1.32305e-17	6.68062e-16	Zfp831
ENSMUSG00000050605	1.24363	0.00471494	0.0167984	Zfp61
ENSMUSG00000050675	-1.29895	1.50781e-06	1.53183e-05	Gp1ba
ENSMUSG00000050714	-1.61081	0.000393439	0.00206183	Zbtb26
ENSMUSG00000050822	1.87066	1.8547e-05	0.000143689	Slc29a4
ENSMUSG00000050930	1.21606	8.6463e-08	1.13486e-06	Map10
ENSMUSG00000050947	-1.7021	0.00539451	0.0188801	Amigo1
ENSMUSG00000050965	-2.57953	6.24871e-07	6.91224e-06	Prkca
ENSMUSG00000050989	-1.44133	1.2147e-28	1.48957e-26	Selenon
ENSMUSG00000051000	2.54892	1.23295e-11	3.1251e-10	Fam160a1
ENSMUSG00000051098	-1.24316	1.56613e-05	0.000123638	Mblac2
ENSMUSG00000051107	-2.17233	1.55978e-11	3.87717e-10	NA
ENSMUSG00000051185	1.11624	2.59756e-15	1.0824e-13	Fam174a
ENSMUSG00000051344	-2.23735	1.18718e-36	2.31608e-34	Plekhm3
ENSMUSG00000051504	-2.44797	1.6891e-06	1.69384e-05	Siglech
ENSMUSG00000051627	-1.17331	2.16725e-06	2.10181e-05	Hist1h1e
ENSMUSG00000051674	-1.31884	0.000438313	0.0022593	Dcun1d4
ENSMUSG00000051682	-1.33821	1.33306e-18	7.52828e-17	Treml4
ENSMUSG00000051832	-2.51142	1.48768e-09	2.71322e-08	E230016K23Rik
ENSMUSG00000051984	-1.19908	0.00449521	0.0161406	Sec31b
ENSMUSG00000052234	-4.00757	1.75079e-21	1.26647e-19	Epx
ENSMUSG00000052336	-1.31905	0.00624068	0.021354	Cx3cr1
ENSMUSG00000052396	-1.47164	1.15334e-13	3.9601e-12	Mogat2
ENSMUSG00000052676	-1.01715	0.000442439	0.00227504	Zmat1
ENSMUSG00000052713	-1.27126	8.48997e-12	2.20842e-10	Zfp608
ENSMUSG00000052837	-1.71349	4.35898e-30	5.7862e-28	Junb
ENSMUSG00000052942	-1.56921	2.59208e-06	2.47044e-05	Glis3
ENSMUSG00000053080	-1.78519	0.00287879	0.0111146	2700081O15Rik
ENSMUSG00000053113	-1.64051	4.45364e-28	5.26102e-26	Socs3
ENSMUSG00000053263	1.94783	0.00552244	0.0192649	Gm12592
ENSMUSG00000053310	-2.33906	7.35805e-06	6.32037e-05	Nrgn
ENSMUSG00000053318	1.23056	0.00275587	0.0107172	Slamf8
ENSMUSG00000053333	1.21986	3.41687e-10	6.93937e-09	Dis3l2
ENSMUSG00000053398	1.02743	0.00141313	0.00612641	Phgdh
ENSMUSG00000053411	-1.02184	0.00135873	0.00592948	Cbx7
ENSMUSG00000053442	1.15245	0.0017295	0.0072751	4930597O21Rik
ENSMUSG00000053477	-1.1059	4.48106e-07	5.10603e-06	Tcf4
ENSMUSG00000053617	-1.53089	0.000245769	0.00137708	Sh3pxd2a
ENSMUSG00000053687	2.64311	2.66766e-07	3.17163e-06	Dpep2
ENSMUSG00000053819	2.27245	3.71506e-67	3.18901e-64	Camk2d
ENSMUSG00000053846	3.70086	1.82251e-16	8.44123e-15	Lipg
ENSMUSG00000053931	-1.0971	0.00629834	0.0214904	Cnn3
ENSMUSG00000053965	-3.16947	2.11067e-09	3.74339e-08	Pde5a
ENSMUSG00000054065	2.79301	9.44991e-26	9.89244e-24	Pkp3
ENSMUSG00000054072	2.7855	0.000322292	0.0017407	Iigp1
ENSMUSG00000054203	1.60606	0.00764012	0.0251854	Ifi205
ENSMUSG00000054641	-2.53171	7.89611e-05	0.000514266	Mmrn1
ENSMUSG00000054737	-1.15553	1.38607e-05	0.000111011	Zfp182
ENSMUSG00000054905	3.86078	5.75757e-51	2.47115e-48	Stfa3
ENSMUSG00000054999	-1.88284	0.000866276	0.00403118	Naaladl1
ENSMUSG00000055210	-4.06696	1.5174e-06	1.53481e-05	Foxd2
ENSMUSG00000055322	-1.21115	3.03699e-05	0.000220928	Tns1
ENSMUSG00000055629	3.64665	3.18243e-15	1.31759e-13	B4galnt4
ENSMUSG00000055633	1.24855	0.00553271	0.0192955	Zfp580
ENSMUSG00000055717	-1.3654	1.98261e-13	6.54567e-12	Slain1
ENSMUSG00000055745	1.21949	0.00106086	0.00479622	Rtl6
ENSMUSG00000055978	-3.72664	1.22991e-08	1.89884e-07	Fut2
ENSMUSG00000055994	-1.04792	4.79328e-13	1.46599e-11	Nod2
ENSMUSG00000056399	-1.40967	1.25272e-06	1.29454e-05	Prss34
ENSMUSG00000056492	-2.94357	3.99093e-06	3.63932e-05	Adgrf5
ENSMUSG00000056596	4.8475	5.46562e-08	7.43926e-07	Trnp1
ENSMUSG00000056629	1.1072	3.87163e-08	5.40098e-07	Fkbp2
ENSMUSG00000056708	-1.93687	2.96932e-43	9.32511e-41	Ier5
ENSMUSG00000056973	-5.72746	2.46614e-33	4.0195e-31	Ces1d
ENSMUSG00000057098	-2.54549	8.84395e-09	1.41284e-07	Ebf1
ENSMUSG00000057123	1.42753	0.000218865	0.0012464	Gja5
ENSMUSG00000057135	-1.4681	0.0140113	0.0414069	Scimp
ENSMUSG00000057337	-2.33366	4.83438e-08	6.64328e-07	Chst3
ENSMUSG00000057722	-2.4763	0.00150858	0.00647049	Lepr
ENSMUSG00000057841	1.05766	3.00586e-10	6.15317e-09	Rpl32
ENSMUSG00000058056	1.20295	8.37419e-05	0.00053994	Palld
ENSMUSG00000058070	-1.65028	0.00625201	0.02137	Eml1
ENSMUSG00000058163	2.27479	1.91692e-05	0.000147709	Gm5431
ENSMUSG00000058174	1.21062	0.00527976	0.0185389	Gm5148
ENSMUSG00000058252	3.56839	2.04232e-16	9.39173e-15	Tcp11x2
ENSMUSG00000058254	-2.04084	0.00114921	0.00513082	Tspan7
ENSMUSG00000058258	1.14506	1.25052e-07	1.58793e-06	Idi1
ENSMUSG00000058396	-2.87284	1.76323e-05	0.000137429	Gpr182
ENSMUSG00000058427	-2.16296	2.52621e-19	1.49209e-17	Cxcl2
ENSMUSG00000058443	1.51043	0.00733003	0.0243377	Rpl10-ps3
ENSMUSG00000058728	-3.01037	1.97387e-05	0.000151554	Cd300c
ENSMUSG00000058755	-1.41764	2.56531e-23	2.26239e-21	Osm
ENSMUSG00000058869	-3.41529	2.87445e-06	2.70749e-05	Gm4832
ENSMUSG00000059108	1.17172	1.25352e-11	3.16478e-10	Ifitm6
ENSMUSG00000059305	-3.10526	8.04402e-09	1.2948e-07	Vpreb1
ENSMUSG00000059336	-1.33736	0.00241041	0.00960584	Slc14a1
ENSMUSG00000059495	-1.13836	0.0112308	0.0345622	Arhgef12
ENSMUSG00000059588	-1.28156	5.0012e-11	1.15611e-09	Calcrl
ENSMUSG00000059657	1.43181	2.80693e-11	6.68059e-10	Stfa2l1
ENSMUSG00000059743	2.25826	6.67376e-32	9.99202e-30	Fdps
ENSMUSG00000059824	-2.16379	5.28825e-08	7.22073e-07	Dbp
ENSMUSG00000059994	-1.3692	4.29983e-12	1.15103e-10	Fcrl1
ENSMUSG00000060019	1.49416	0.00145067	0.00625548	Gm10073
ENSMUSG00000060063	1.23047	4.61692e-13	1.42135e-11	Alox5ap
ENSMUSG00000060429	-3.49067	2.97886e-21	2.08455e-19	Sntb1
ENSMUSG00000060445	-2.09813	6.24037e-13	1.88176e-11	Sycp2
ENSMUSG00000060477	-1.07396	9.58844e-19	5.4388e-17	Irak2
ENSMUSG00000060512	1.27171	0.00365496	0.0135937	0610040J01Rik
ENSMUSG00000060989	1.55531	0.0106126	0.0330546	Gm11847
ENSMUSG00000061086	-3.16063	9.38805e-09	1.48502e-07	Myl4
ENSMUSG00000061132	-1.85623	4.71273e-07	5.33695e-06	Blnk
ENSMUSG00000061143	-1.04982	0.00289517	0.0111578	Maml3
ENSMUSG00000061175	-1.14698	3.44231e-18	1.824e-16	Fnip2
ENSMUSG00000061186	-3.13745	1.47495e-31	2.15812e-29	Sfmbt2
ENSMUSG00000061311	-8.88598	5.32149e-15	2.1148e-13	Rag1
ENSMUSG00000061353	-2.94791	6.68243e-07	7.32904e-06	Cxcl12
ENSMUSG00000061410	-2.1754	7.15255e-07	7.77839e-06	Zcchc14
ENSMUSG00000061411	-2.25838	2.08403e-11	5.06301e-10	Nol4l
ENSMUSG00000061723	-1.9734	7.53795e-08	1.00071e-06	Tnnt3
ENSMUSG00000061815	-1.47	5.78181e-13	1.75168e-11	Rufy4
ENSMUSG00000062110	1.06065	4.6123e-08	6.3721e-07	Scfd2
ENSMUSG00000062148	-3.09895	1.08388e-22	9.00387e-21	Ear6
ENSMUSG00000062175	-2.60945	8.33973e-13	2.46856e-11	Tgif2
ENSMUSG00000062300	1.96494	2.66925e-05	0.000197253	Nectin2
ENSMUSG00000062345	-2.99884	1.59374e-08	2.38617e-07	Serpinb2
ENSMUSG00000062515	-2.04206	1.05706e-07	1.3638e-06	Fabp4
ENSMUSG00000062593	-1.06471	2.22853e-12	6.19753e-11	Lilrb4a
ENSMUSG00000062861	-1.02323	3.92979e-05	0.000278788	Zfp28
ENSMUSG00000062939	-1.42966	9.98421e-15	3.849e-13	Stat4
ENSMUSG00000062960	-3.02725	5.99694e-06	5.24926e-05	Kdr
ENSMUSG00000062980	1.93405	3.88572e-07	4.47118e-06	Cped1
ENSMUSG00000063146	-2.05754	3.01538e-47	1.17655e-44	Clip2
ENSMUSG00000063160	-1.30765	1.85488e-07	2.28113e-06	Numbl
ENSMUSG00000063193	-1.08875	1.83946e-26	2.00719e-24	Cd300lb
ENSMUSG00000063232	-1.54896	0.0128257	0.0385129	Serpina11
ENSMUSG00000063268	1.06522	1.09164e-10	2.36235e-09	Parp10
ENSMUSG00000063354	-2.93215	2.30056e-70	2.46851e-67	Slc39a4
ENSMUSG00000063458	3.92713	9.94605e-43	2.91058e-40	Lrmda
ENSMUSG00000063535	1.91897	6.55781e-11	1.49448e-09	Zfp773
ENSMUSG00000063568	-1.43985	0.00179921	0.00753141	Jazf1
ENSMUSG00000063646	-2.44795	8.1653e-10	1.55527e-08	Jakmip1
ENSMUSG00000063760	1.78742	0.00155393	0.00663546	Rnf217
ENSMUSG00000063767	-1.70368	0.00293168	0.0112715	S100a7a
ENSMUSG00000063903	-5.48068	6.93652e-09	1.12771e-07	Klk1
ENSMUSG00000064061	-1.01868	0.00053346	0.00267062	Dzip3
ENSMUSG00000064080	-1.74793	0.00373769	0.0138396	Fbln2
ENSMUSG00000064280	-3.23622	1.59746e-06	1.6082e-05	Ccdc146
ENSMUSG00000064373	-1.19097	2.64703e-08	3.78282e-07	Selenop
ENSMUSG00000065444	-2.07247	0.00085559	0.00399152	Mir27a
ENSMUSG00000066026	-1.51777	4.60976e-22	3.64143e-20	Dhrs3
ENSMUSG00000066057	1.82947	0.000119054	0.000734165	Gm1976
ENSMUSG00000066150	1.84463	3.40215e-62	2.30559e-59	Slc31a1
ENSMUSG00000066233	-1.22476	5.80561e-09	9.547e-08	Tmem42
ENSMUSG00000066363	2.90962	2.69968e-08	3.84526e-07	Serpina3f
ENSMUSG00000066677	4.86597	1.76828e-13	5.8833e-12	Pydc3
ENSMUSG00000066894	-1.92778	1.95246e-27	2.22477e-25	Vsig10
ENSMUSG00000067235	-1.92229	8.01162e-26	8.59647e-24	H2-Q10
ENSMUSG00000067297	-1.31913	8.24623e-07	8.85558e-06	Ifit1bl2
ENSMUSG00000067577	1.35755	0.000192061	0.00111568	A430093F15Rik
ENSMUSG00000067614	-1.28342	6.57374e-11	1.49547e-09	Krt86
ENSMUSG00000067818	-2.84609	2.95051e-07	3.46948e-06	Myl9
ENSMUSG00000067925	-1.40234	0.00127511	0.0056016	Rtl8a
ENSMUSG00000068114	1.0703	6.12886e-08	8.25473e-07	Ccdc134
ENSMUSG00000068129	1.10338	0.00056498	0.00280833	Cst7
ENSMUSG00000068264	-1.08066	2.91413e-07	3.43296e-06	Ap5s1
ENSMUSG00000068407	-2.56096	7.48867e-05	0.000490209	Rnase12
ENSMUSG00000068551	-3.14879	1.04098e-19	6.38272e-18	Zfp467
ENSMUSG00000068606	3.34328	0.000135805	0.000826385	Gm4841
ENSMUSG00000068735	-1.2594	0.000135013	0.00082234	Trp53i11
ENSMUSG00000068749	1.09326	1.02394e-10	2.24093e-09	Psma5
ENSMUSG00000068758	1.54889	2.19843e-13	7.18452e-12	Il3ra
ENSMUSG00000068923	-1.87166	0.000119579	0.00073705	Syt11
ENSMUSG00000069114	-1.88624	6.84812e-05	0.000452187	Zbtb10
ENSMUSG00000069267	1.56543	0.0121897	0.0369153	Hist1h3b
ENSMUSG00000069305	-1.78227	2.30369e-09	4.0689e-08	Hist1h4n
ENSMUSG00000069306	1.58339	0.000667138	0.00322571	Hist1h4m
ENSMUSG00000069308	1.41187	0.00500825	0.0177258	Hist1h2bp
ENSMUSG00000069515	-1.08006	5.34667e-09	8.88306e-08	Lyz1
ENSMUSG00000069516	-1.39688	2.35659e-21	1.67643e-19	Lyz2
ENSMUSG00000069607	-2.23784	2.65092e-05	0.000196168	Cd300ld3
ENSMUSG00000069662	-1.01189	5.69242e-05	0.000384956	Marcks
ENSMUSG00000069805	1.842	6.11677e-10	1.18614e-08	Fbp1
ENSMUSG00000069830	-1.60758	3.92403e-13	1.22043e-11	Nlrp1a
ENSMUSG00000069874	1.63809	6.91538e-16	3.02865e-14	Irgm2
ENSMUSG00000070003	1.06111	2.82483e-09	4.9152e-08	Ssbp4
ENSMUSG00000070056	-1.33112	0.00479288	0.017062	Mfhas1
ENSMUSG00000070305	-2.27683	3.8232e-17	1.90068e-15	Mpzl3
ENSMUSG00000070315	-1.14328	5.60573e-15	2.2209e-13	4930581F22Rik
ENSMUSG00000070390	-2.62962	2.79102e-12	7.62996e-11	Nlrp1b
ENSMUSG00000070427	1.22776	1.95533e-30	2.65019e-28	Il18bp
ENSMUSG00000070436	-4.04591	6.19865e-09	1.01674e-07	Serpinh1
ENSMUSG00000070469	2.00628	1.29041e-11	3.25153e-10	Adamtsl3
ENSMUSG00000070498	-2.863	3.47432e-07	4.03384e-06	Tmem132b
ENSMUSG00000070729	-1.0875	0.00813514	0.0265791	Gm12966
ENSMUSG00000070858	-1.41793	6.61575e-05	0.000438891	Gm1673
ENSMUSG00000070868	-8.52122	6.95954e-14	2.42192e-12	Skint3
ENSMUSG00000070953	1.07525	5.01336e-06	4.48902e-05	Rabepk
ENSMUSG00000070972	1.04007	2.07028e-07	2.51243e-06	Dnajc25
ENSMUSG00000071226	-2.48199	1.14897e-06	1.19596e-05	Cecr2
ENSMUSG00000071489	-5.1069	1.53152e-09	2.78924e-08	Ptgdr
ENSMUSG00000071561	4.24423	2.18606e-20	1.44347e-18	BC100530
ENSMUSG00000071562	3.0797	5.15482e-30	6.70439e-28	Stfa1
ENSMUSG00000071757	-1.79863	2.67574e-31	3.82809e-29	Zhx2
ENSMUSG00000072244	1.69873	7.16803e-06	6.16537e-05	Trim6
ENSMUSG00000072596	-2.13752	8.02899e-35	1.43585e-32	Ear2
ENSMUSG00000072601	-3.87231	1.43035e-13	4.84663e-12	Ear1
ENSMUSG00000072612	-1.42714	1.42693e-09	2.61725e-08	Gm10382
ENSMUSG00000072663	1.37516	1.36505e-06	1.40162e-05	Spef2
ENSMUSG00000072673	-1.76187	0.000264601	0.00146601	Gm10392
ENSMUSG00000072683	1.37911	1.90368e-07	2.33224e-06	Gm7457
ENSMUSG00000072694	1.09109	6.12401e-05	0.000411764	1500011B03Rik
ENSMUSG00000072949	-2.93189	1.5561e-32	2.44346e-30	Acot1
ENSMUSG00000073016	-2.60139	4.16278e-07	4.76763e-06	Uprt
ENSMUSG00000073412	-1.23209	6.5068e-18	3.35126e-16	Lst1
ENSMUSG00000073418	3.07542	3.53158e-26	3.82123e-24	C4b
ENSMUSG00000073437	-1.29264	5.46932e-06	4.84339e-05	D330041H03Rik
ENSMUSG00000073491	1.67956	0.000417111	0.002163	Ifi213
ENSMUSG00000073492	-2.01993	3.91131e-14	1.39895e-12	Gm10521
ENSMUSG00000073555	3.93449	4.18839e-23	3.57151e-21	Gm4951
ENSMUSG00000073633	1.28498	0.00324863	0.0122919	Fbxo36
ENSMUSG00000073643	-1.30144	5.22715e-24	4.80748e-22	Wdfy1
ENSMUSG00000073739	-1.31699	0.0113941	0.0349643	Gm16287
ENSMUSG00000073771	-1.21699	4.79103e-10	9.44707e-09	Btbd19
ENSMUSG00000073791	-1.62568	0.000187023	0.00109063	Efcab7
ENSMUSG00000073910	-1.33457	0.000238546	0.00134069	Mob3b
ENSMUSG00000073980	1.57415	0.00294941	0.011316	Gm9574
ENSMUSG00000074063	-1.10584	1.40959e-09	2.58914e-08	Osgin1
ENSMUSG00000074071	1.48585	9.92986e-15	3.83954e-13	Fam169b
ENSMUSG00000074151	1.32121	0.00206454	0.00844977	Nlrc5
ENSMUSG00000074203	1.56316	0.00395853	0.0145379	G430095P16Rik
ENSMUSG00000074227	-1.14589	1.12962e-08	1.76302e-07	Spint2
ENSMUSG00000074240	-1.31459	0.00229516	0.00922074	Cib3
ENSMUSG00000074274	1.97457	7.86367e-08	1.04062e-06	D930028M14Rik
ENSMUSG00000074305	-2.57693	5.13943e-15	2.05514e-13	Peak1
ENSMUSG00000074361	-1.185	3.74637e-14	1.34744e-12	C5ar2
ENSMUSG00000074364	-3.29314	1.10584e-06	1.15763e-05	Ehd2
ENSMUSG00000074420	6.0615	1.71429e-07	2.11632e-06	Gm10693
ENSMUSG00000074570	-2.09781	2.77834e-23	2.41715e-21	Cass4
ENSMUSG00000074677	-2.58032	9.86443e-36	1.84079e-33	Sirpb1c
ENSMUSG00000074743	-2.67654	4.85261e-22	3.76399e-20	Thbd
ENSMUSG00000074783	-1.62677	0.0070095	0.0234732	AU019990
ENSMUSG00000074793	-1.36236	0.0120872	0.0366545	Hspa12b
ENSMUSG00000074805	-3.84329	1.39817e-24	1.3435e-22	Il1bos
ENSMUSG00000075010	3.25677	2.37778e-32	3.60192e-30	AW112010
ENSMUSG00000075184	-1.03395	0.0160189	0.0460708	F930017D23Rik
ENSMUSG00000075266	1.03668	1.66485e-06	1.67342e-05	Cenpw
ENSMUSG00000075279	-1.4513	2.65296e-11	6.33758e-10	Mrpl23-ps1
ENSMUSG00000075289	-1.07148	1.0581e-10	2.30527e-09	Carns1
ENSMUSG00000075296	-1.05497	3.96938e-06	3.62223e-05	Aldh3b2
ENSMUSG00000075370	-8.24902	1.32308e-12	3.83694e-11	Igll1
ENSMUSG00000075602	2.22207	7.75434e-11	1.73643e-09	Ly6a
ENSMUSG00000075701	1.00246	1.84064e-10	3.8789e-09	Selenos
ENSMUSG00000075702	1.25061	0.000244228	0.00137023	Selenom
ENSMUSG00000076431	-3.43577	9.45544e-12	2.4301e-10	Sox4
ENSMUSG00000076441	1.01153	0.00311509	0.0118434	Ass1
ENSMUSG00000076508	-1.3303	0.0123158	0.0372163	Igkv17-127
ENSMUSG00000076523	-2.21937	0.000218811	0.0012464	Igkv15-103
ENSMUSG00000076541	-5.08093	2.06172e-07	2.50441e-06	Igkv4-79
ENSMUSG00000076555	-1.86763	0.000272947	0.00150771	Igkv4-57-1
ENSMUSG00000076562	-1.85805	0.00675974	0.0227969	Igkv4-50
ENSMUSG00000076575	-4.51824	0.000737858	0.00351876	Igkv7-33
ENSMUSG00000076576	-2.74536	0.0170691	0.0485358	Igkv6-32
ENSMUSG00000076613	-1.177	0.000198484	0.0011445	Ighg2b
ENSMUSG00000076614	-2.27872	3.01829e-05	0.000219692	Ighg1
ENSMUSG00000076665	-1.87248	0.000300584	0.00163581	Ighv7-1
ENSMUSG00000076666	-3.60796	8.95094e-06	7.45512e-05	Ighv14-4
ENSMUSG00000076731	-1.51826	0.000366826	0.00194613	Ighv8-12
ENSMUSG00000076939	-2.65453	0.000724857	0.00346703	Iglv3
ENSMUSG00000077440	-1.03174	0.0104284	0.0326149	Gm23130
ENSMUSG00000077704	-1.82968	0.00386076	0.0142113	Snord89
ENSMUSG00000078144	-1.57044	0.000463993	0.00236515	Capns2
ENSMUSG00000078349	-1.70066	2.0404e-09	3.63377e-08	AW011738
ENSMUSG00000078485	-1.61001	1.56615e-09	2.83624e-08	Plekhn1
ENSMUSG00000078486	-1.45028	0.000159938	0.00095297	Perm1
ENSMUSG00000078490	-2.0871	5.22951e-05	0.000357785	Cfap74
ENSMUSG00000078502	1.03535	0.000109727	0.00068485	Gm13212
ENSMUSG00000078606	1.9604	0.00198583	0.00818749	Gm4070
ENSMUSG00000078771	-1.0087	4.78391e-22	3.73319e-20	Evi2a
ENSMUSG00000078780	-4.08137	3.5252e-160	2.26952e-156	Gm5150
ENSMUSG00000078783	-1.2412	1.03036e-13	3.56638e-12	Gm9733
ENSMUSG00000078810	-3.02313	0.000343487	0.00184127	Gp6
ENSMUSG00000078816	-1.558	1.09786e-06	1.1502e-05	Prkcg
ENSMUSG00000078817	-1.50292	1.03518e-24	1.00218e-22	Nlrp12
ENSMUSG00000078853	1.7557	3.54921e-13	1.11735e-11	Igtp
ENSMUSG00000078877	1.7967	0.0104684	0.0327167	Gm14295
ENSMUSG00000078920	1.91877	6.1295e-13	1.85266e-11	Ifi47
ENSMUSG00000078921	2.38056	8.38808e-06	7.066e-05	Tgtp2
ENSMUSG00000078922	3.25269	1.23263e-05	9.96317e-05	Tgtp1
ENSMUSG00000078942	1.13434	3.20723e-07	3.7474e-06	Naip6
ENSMUSG00000079019	1.64273	0.00413032	0.0150871	Insl3
ENSMUSG00000079037	3.56609	1.53072e-89	2.18996e-86	Prnp
ENSMUSG00000079164	-2.80777	2.86754e-24	2.69507e-22	Tlr5
ENSMUSG00000079190	1.80927	0.00293105	0.0112715	AC133103.1
ENSMUSG00000079197	1.03473	3.53588e-14	1.27529e-12	Psme2
ENSMUSG00000079227	1.25731	0.017046	0.048494	Ccr5
ENSMUSG00000079293	-3.94294	7.96702e-100	1.28229e-96	Clec7a
ENSMUSG00000079355	-1.87679	0.0064857	0.0220122	Ackr4
ENSMUSG00000079363	2.9208	0.00017059	0.0010085	Gbp4
ENSMUSG00000079419	1.78346	3.64472e-09	6.23233e-08	Ms4a6c
ENSMUSG00000079435	1.17083	7.27101e-08	9.68165e-07	Rpl36a
ENSMUSG00000079547	1.15438	2.56999e-07	3.06684e-06	H2-DMb1
ENSMUSG00000079594	3.88525	8.8362e-18	4.47933e-16	BC117090
ENSMUSG00000079597	1.31792	3.85866e-11	9.03348e-10	Gm5483
ENSMUSG00000080717	1.44447	5.17757e-08	7.08463e-07	B230307C23Rik
ENSMUSG00000080783	-1.19425	1.80911e-08	2.66534e-07	Gm8250
ENSMUSG00000080814	-1.08469	4.66011e-05	0.000323819	Gm12314
ENSMUSG00000080921	1.02312	1.38695e-06	1.42071e-05	Rpl38-ps2
ENSMUSG00000081769	1.19475	0.00925604	0.0296248	Gm12216
ENSMUSG00000081805	-1.72019	3.89856e-05	0.00027703	Gm14335
ENSMUSG00000082101	-2.14294	9.79906e-05	0.000617832	Slfn14
ENSMUSG00000082229	-1.75733	0.000794359	0.00374247	Nap1l2
ENSMUSG00000082286	-1.00103	2.55521e-08	3.65566e-07	Pisd-ps1
ENSMUSG00000082292	2.51038	8.18551e-20	5.06715e-18	Gm12250
ENSMUSG00000083012	-1.10967	4.99163e-06	4.4789e-05	Fam220a
ENSMUSG00000083161	1.03508	0.000257343	0.00143258	Gm11427
ENSMUSG00000083307	2.57304	5.77786e-06	5.08514e-05	AA414768
ENSMUSG00000083430	-1.63505	0.00126017	0.00554353	Gm13006
ENSMUSG00000083716	1.08892	0.00287838	0.0111146	Gm13436
ENSMUSG00000083849	-1.87122	2.89522e-06	2.72506e-05	Gm13477
ENSMUSG00000084012	-1.80859	2.19004e-05	0.000165876	Gm11956
ENSMUSG00000084416	1.22377	0.00488198	0.0173408	Rpl10a-ps1
ENSMUSG00000084792	-2.11371	4.8863e-05	0.00033699	1700056N10Rik
ENSMUSG00000084803	-1.72625	4.04523e-06	3.68623e-05	5830444B04Rik
ENSMUSG00000084807	-3.51637	4.54319e-16	2.02415e-14	Gm13073
ENSMUSG00000084918	-1.47304	2.69029e-07	3.18727e-06	Gm12708
ENSMUSG00000084956	-1.13118	8.9723e-09	1.42979e-07	Gm16194
ENSMUSG00000084968	-1.98552	0.00106663	0.0048189	Gm12743
ENSMUSG00000085028	-1.07616	2.38851e-05	0.000179013	Slc2a4rg-ps
ENSMUSG00000085154	-1.0881	0.0164993	0.0472205	C130046K22Rik
ENSMUSG00000085223	-3.92103	2.14198e-10	4.46282e-09	Gm11210
ENSMUSG00000085399	-3.66236	4.20494e-09	7.09605e-08	Foxd2os
ENSMUSG00000085666	-3.12068	1.99207e-06	1.94908e-05	Gm9855
ENSMUSG00000085672	-1.46983	1.00801e-09	1.892e-08	Gm16193
ENSMUSG00000085730	1.39931	0.000223256	0.00126804	Gm13307
ENSMUSG00000085894	-1.65718	3.6656e-10	7.38628e-09	Gm15832
ENSMUSG00000085915	-1.10197	8.1746e-09	1.31242e-07	Gm8091
ENSMUSG00000085936	-1.73403	0.00173542	0.00729286	2610307P16Rik
ENSMUSG00000085996	-1.34339	0.00120772	0.00534752	A830012C17Rik
ENSMUSG00000086146	-1.14944	6.71231e-10	1.28997e-08	Gm15729
ENSMUSG00000086264	-1.75491	0.00456475	0.0163402	Gm15850
ENSMUSG00000086296	-2.3027	4.19236e-12	1.12695e-10	D030055H07Rik
ENSMUSG00000086335	-1.18871	0.000271036	0.00149872	Gm12107
ENSMUSG00000086399	-1.36325	0.00105937	0.00479118	Gm16144
ENSMUSG00000086564	-3.37188	2.30607e-130	9.89767e-127	Cd101
ENSMUSG00000086683	-1.57286	1.01488e-06	1.07111e-05	Gm12867
ENSMUSG00000086693	-1.38841	0.000250702	0.00139923	A730081D07Rik
ENSMUSG00000087113	-1.05384	5.05552e-07	5.69509e-06	Gm11714
ENSMUSG00000087142	-1.2697	0.000334987	0.0018002	Gm12454
ENSMUSG00000087187	-2.0514	1.68223e-13	5.61151e-12	Gm13431
ENSMUSG00000087195	-1.90787	2.87642e-05	0.000210317	Gm12907
ENSMUSG00000087203	-1.10688	0.00199052	0.00819897	Gm13986
ENSMUSG00000087213	1.24703	1.55726e-07	1.93733e-06	2810408I11Rik
ENSMUSG00000087259	-4.49558	1.48805e-44	5.17842e-42	2610035D17Rik
ENSMUSG00000087269	-1.08493	3.50154e-08	4.90064e-07	D330023K18Rik
ENSMUSG00000087277	-1.30624	0.00139048	0.00604247	2010013B24Rik
ENSMUSG00000087331	-1.09786	0.000157189	0.000938325	1810021B22Rik
ENSMUSG00000087445	-1.38379	0.00416346	0.015178	Gm14286
ENSMUSG00000087480	-1.865	0.00063347	0.0030896	Gm15910
ENSMUSG00000087502	-1.40706	0.00144901	0.00625333	Gm16091
ENSMUSG00000087611	-1.07701	0.0162467	0.0466115	4930458D05Rik
ENSMUSG00000087615	-1.39683	0.015146	0.0440723	Pnpla1os
ENSMUSG00000087624	1.13927	0.00114408	0.00511518	9230111E07Rik
ENSMUSG00000087633	-3.16815	9.20585e-06	7.63754e-05	Gm14455
ENSMUSG00000087644	-1.52735	5.78455e-10	1.13194e-08	Gm14703
ENSMUSG00000089267	-1.78871	0.000447399	0.00229327	Gm22890
ENSMUSG00000089371	-1.1077	0.0120541	0.0365811	Mir1938
ENSMUSG00000089683	-1.88818	0.00011647	0.000720303	4930570N18Rik
ENSMUSG00000089706	-1.44605	0.00201454	0.00827671	B230216N24Rik
ENSMUSG00000089715	-1.5622	0.00018869	0.00109885	Cbx6
ENSMUSG00000089820	-1.70252	0.000135783	0.000826385	Gm15775
ENSMUSG00000089849	-2.61039	5.99735e-10	1.16826e-08	Runx2os2
ENSMUSG00000089901	-2.92737	1.93143e-09	3.44976e-08	Gm8113
ENSMUSG00000089929	-2.07432	2.69137e-12	7.42057e-11	Bcl2a1b
ENSMUSG00000089942	-1.08164	1.07676e-09	2.00063e-08	Pira2
ENSMUSG00000089956	-1.58897	2.11674e-06	2.05826e-05	Gm16553
ENSMUSG00000089984	-1.26285	0.00061654	0.00301961	Fbxo24
ENSMUSG00000090069	-1.29815	1.44655e-09	2.64468e-08	E430024P14Rik
ENSMUSG00000090083	1.84466	8.25753e-21	5.5667e-19	Rnf8
ENSMUSG00000090141	-1.42805	0.00264013	0.0103326	Gm614
ENSMUSG00000090186	-1.14725	0.0120545	0.0365811	Gm7592
ENSMUSG00000090192	-2.55762	6.78944e-44	2.24156e-41	Gm16556
ENSMUSG00000090194	-1.14	0.00912247	0.0292628	Gm16161
ENSMUSG00000090231	1.83914	0.00304648	0.0116385	Cfb
ENSMUSG00000090258	1.11356	8.26117e-10	1.57121e-08	Churc1
ENSMUSG00000090307	-1.14812	0.00201969	0.0082926	1700071M16Rik
ENSMUSG00000090439	-3.36001	1.4229e-19	8.60153e-18	Gm17455
ENSMUSG00000090564	-1.17119	0.000120124	0.000740054	A430057M04Rik
ENSMUSG00000090665	-2.02614	2.59257e-39	5.56365e-37	Gad1-ps
ENSMUSG00000090785	-1.07796	0.0134955	0.0401963	Gm17116
ENSMUSG00000090942	3.01202	0.000336977	0.00180939	F830016B08Rik
ENSMUSG00000091144	1.91552	1.02159e-08	1.60454e-07	Phf11c
ENSMUSG00000091313	-1.78808	0.00691978	0.0232271	Fth-ps2
ENSMUSG00000091649	1.47841	4.99359e-05	0.000343653	Phf11b
ENSMUSG00000091784	-1.67404	0.00416861	0.0151839	Gm17022
ENSMUSG00000091996	-3.00544	1.57884e-09	2.85521e-08	BC049352
ENSMUSG00000092305	-2.35418	1.49529e-11	3.73127e-10	Prps1l1
ENSMUSG00000092371	-1.23939	0.000476295	0.0024161	Gm20511
ENSMUSG00000092418	-1.57173	3.5064e-19	2.04292e-17	Gm20406
ENSMUSG00000092482	-1.2552	0.00447236	0.0160765	Gm20531
ENSMUSG00000092625	-1.49419	0.000416309	0.00215971	Gm20404
ENSMUSG00000092920	-2.27695	2.7853e-40	6.64139e-38	Mirt2
ENSMUSG00000093765	1.06871	0.000856791	0.00399567	Gm20658
ENSMUSG00000093838	-2.27522	0.00973619	0.0308548	Ighv3-1
ENSMUSG00000093954	4.70291	2.4633e-22	1.98234e-20	Gm16867
ENSMUSG00000094088	-2.38166	7.45506e-05	0.000488257	Ighv1-64
ENSMUSG00000094194	-1.80918	0.000668856	0.00323159	Ighv5-16
ENSMUSG00000094345	-3.76524	2.91176e-09	5.05963e-08	Igkv14-126
ENSMUSG00000094433	-3.35914	0.000407412	0.00212039	Igkv5-43
ENSMUSG00000094502	-2.8864	4.87406e-34	8.36779e-32	Ighv1-69
ENSMUSG00000094505	-2.11381	0.00144561	0.00624203	Ighv8-6
ENSMUSG00000094561	-1.74461	0.000598333	0.00294163	Ighv1-22
ENSMUSG00000094652	-2.37789	0.000195215	0.00113021	Ighv1-42
ENSMUSG00000094689	-1.84813	3.60505e-08	5.04002e-07	Ighv1-81
ENSMUSG00000094840	1.3951	2.90852e-07	3.42949e-06	Muc3a
ENSMUSG00000094930	-1.31315	0.00777487	0.0255381	Igkv6-25
ENSMUSG00000094940	-6.28995	1.24417e-08	1.91855e-07	Ighv1-84
ENSMUSG00000095028	-3.11009	9.20777e-82	1.18559e-78	Sirpb1b
ENSMUSG00000095105	1.31313	0.000125907	0.000771257	Edaradd
ENSMUSG00000095200	-1.69521	0.00770418	0.0253706	Ighv1-7
ENSMUSG00000095204	-2.4407	4.23718e-13	1.31149e-11	Ighv1-52
ENSMUSG00000095210	-1.90388	0.00455968	0.0163266	Ighv5-9-1
ENSMUSG00000095332	-1.84584	3.51051e-07	4.06852e-06	Gm9821
ENSMUSG00000095335	-3.63464	1.42333e-07	1.7863e-06	Igkv3-5
ENSMUSG00000095369	-1.9923	0.000742661	0.00353643	Gm21859
ENSMUSG00000095440	3.12957	2.53836e-15	1.06117e-13	Fignl2
ENSMUSG00000095583	-2.55439	4.24825e-05	0.000298746	Ighv14-2
ENSMUSG00000095612	-1.68812	0.00416811	0.0151839	Ighv5-4
ENSMUSG00000095620	3.45387	1.84594e-40	4.57083e-38	2010005H15Rik
ENSMUSG00000095642	-3.10038	0.000282205	0.00155285	Ighv14-3
ENSMUSG00000095720	-1.16285	0.00777438	0.0255381	Gm1604b
ENSMUSG00000095771	-1.21756	0.00162781	0.0069037	Igkv14-111
ENSMUSG00000095788	-2.41428	2.20986e-13	7.19544e-12	Sirpb1a
ENSMUSG00000095794	-1.93374	4.46633e-05	0.000312504	Igkv6-17
ENSMUSG00000095981	-1.31247	0.00435045	0.0157173	Ighv10-1
ENSMUSG00000096108	-2.43825	1.81636e-07	2.23804e-06	Ighv11-2
ENSMUSG00000096210	1.75609	5.91556e-20	3.70772e-18	H1f0
ENSMUSG00000096336	-1.65021	2.47104e-05	0.000184661	Igkv1-135
ENSMUSG00000096351	-1.47672	0.0158395	0.0456653	Samd11
ENSMUSG00000096459	-2.05295	5.00929e-06	4.48849e-05	Ighv9-3
ENSMUSG00000096498	-1.92043	0.00254799	0.010037	Ighv2-5
ENSMUSG00000096594	-3.5835	7.8307e-21	5.30674e-19	Igkv8-19
ENSMUSG00000096632	-2.44214	0.000363139	0.00192816	Igkv9-124
ENSMUSG00000096672	-1.63904	9.81303e-05	0.000618163	Ighv1-63
ENSMUSG00000096768	1.77894	0.000572681	0.00284009	Gm47283
ENSMUSG00000096802	-1.48765	0.000293554	0.00160365	Gm15433
ENSMUSG00000096844	-2.47603	0.000245005	0.00137339	Igkv6-14
ENSMUSG00000096917	2.89118	1.05623e-40	2.83333e-38	2500002B13Rik
ENSMUSG00000096954	-1.15343	0.00210561	0.00858243	Gdap10
ENSMUSG00000096982	-1.58638	0.00639453	0.0217303	Redrum
ENSMUSG00000097006	1.20942	6.95975e-10	1.33354e-08	9530082P21Rik
ENSMUSG00000097056	-2.22416	0.00234131	0.00938026	Gm4262
ENSMUSG00000097108	-2.33524	1.80901e-06	1.80006e-05	Gm26581
ENSMUSG00000097125	-2.43279	3.05913e-24	2.8543e-22	Gm26885
ENSMUSG00000097133	-1.38421	0.000160235	0.000954297	Gm26628
ENSMUSG00000097177	-1.05527	0.00246448	0.00976991	9330159M07Rik
ENSMUSG00000097194	1.74005	4.16571e-09	7.03907e-08	9330175E14Rik
ENSMUSG00000097295	-1.04934	0.00727547	0.0242002	Hmgb1-ps8
ENSMUSG00000097296	-1.13993	0.000979897	0.00448212	Gm26532
ENSMUSG00000097334	-1.51068	0.00292369	0.0112475	2700012I20Rik
ENSMUSG00000097354	-1.44185	1.45484e-31	2.15317e-29	2310001H17Rik
ENSMUSG00000097471	-1.26933	9.70051e-24	8.73453e-22	5830432E09Rik
ENSMUSG00000097472	-1.28881	0.00556033	0.0193709	Gm26586
ENSMUSG00000097514	-1.34562	7.41026e-06	6.3525e-05	Gm17619
ENSMUSG00000097536	-1.63157	1.24105e-09	2.29264e-08	2610037D02Rik
ENSMUSG00000097548	-1.55155	0.0115816	0.0354553	Gm26748
ENSMUSG00000097557	-1.67199	1.56144e-09	2.83171e-08	C130060C02Rik
ENSMUSG00000097572	-1.65349	1.49567e-08	2.26036e-07	Gm26797
ENSMUSG00000097576	-2.62177	1.01397e-09	1.90042e-08	D930030I03Rik
ENSMUSG00000097589	-1.16771	2.98528e-06	2.7996e-05	Dleu2
ENSMUSG00000097668	2.97784	2.02225e-05	0.000154991	Gm26761
ENSMUSG00000097705	-1.09755	2.56189e-10	5.30335e-09	Gm26740
ENSMUSG00000097729	-1.30761	5.3588e-06	4.76183e-05	2310015A10Rik
ENSMUSG00000097754	-2.68207	8.39214e-17	4.01699e-15	Ptgs2os2
ENSMUSG00000097779	-2.00443	8.33108e-34	1.41146e-31	4833407H14Rik
ENSMUSG00000097784	1.3059	0.00234284	0.00938302	A430105J06Rik
ENSMUSG00000097815	-1.67556	3.30965e-15	1.36587e-13	Gm26809
ENSMUSG00000097834	-2.73687	4.27532e-05	0.000300322	Gm26911
ENSMUSG00000097857	-1.54115	0.00306018	0.0116784	Gm26603
ENSMUSG00000097899	-1.33281	0.00103629	0.00469835	Gm16894
ENSMUSG00000097944	-1.23511	1.01339e-07	1.31802e-06	A130014A01Rik
ENSMUSG00000098192	1.45168	0.00805062	0.0263497	Gm3534
ENSMUSG00000098207	-1.49775	0.0114756	0.0351809	Arl14
ENSMUSG00000098678	-1.42102	0.00512509	0.0180598	Mroh6
ENSMUSG00000098708	4.08021	2.32818e-18	1.25429e-16	Gm27252
ENSMUSG00000098934	2.02415	2.50864e-05	0.000187036	Gm18853
ENSMUSG00000099241	3.05352	1.90171e-07	2.33204e-06	Gm18852
ENSMUSG00000099474	1.34303	1.5155e-06	1.53481e-05	1700097N02Rik
ENSMUSG00000099775	3.40788	3.47137e-22	2.77429e-20	Gm5960
ENSMUSG00000099974	-1.97827	4.28022e-05	0.000300502	Bcl2a1d
ENSMUSG00000100157	-1.46772	0.000415675	0.00215816	2310034O05Rik
ENSMUSG00000100182	-1.96183	2.90926e-19	1.70271e-17	1810006J02Rik
ENSMUSG00000100280	-1.04864	0.00017829	0.00104825	Gm28417
ENSMUSG00000100548	1.33619	0.00157688	0.00671646	Gm29585
ENSMUSG00000100629	-2.46389	1.03191e-09	1.92843e-08	Gm28192
ENSMUSG00000100783	1.49839	1.28162e-07	1.62263e-06	2310047D07Rik
ENSMUSG00000101191	-1.81462	3.39782e-21	2.36488e-19	Gm28809
ENSMUSG00000101268	-2.54743	3.53653e-09	6.05537e-08	2010310C07Rik
ENSMUSG00000101389	1.96623	1.1881e-07	1.51315e-06	Ms4a4a
ENSMUSG00000101517	-2.3297	4.20652e-13	1.30514e-11	4732465J04Rik
ENSMUSG00000101859	-5.61541	1.39794e-18	7.86023e-17	Gm29233
ENSMUSG00000101939	-7.31662	1.44804e-09	2.64468e-08	Gm28438
ENSMUSG00000102037	-1.0503	0.00197942	0.00816892	Bcl2a1a
ENSMUSG00000102155	-2.57208	8.74855e-22	6.58751e-20	Gm37468
ENSMUSG00000102196	-2.51629	2.28456e-11	5.52931e-10	Gm38171
ENSMUSG00000102244	1.69063	0.0127896	0.0384226	Gm37714
ENSMUSG00000102305	-1.67273	0.00102328	0.00464918	Gm38192
ENSMUSG00000102323	-2.54802	6.45229e-06	5.6097e-05	Gm37790
ENSMUSG00000102336	1.43947	0.00564699	0.0196117	Gm37233
ENSMUSG00000102535	-1.09164	8.27727e-11	1.84391e-09	Ighv1-41
ENSMUSG00000102856	-1.78156	0.00076388	0.00362007	Gm37084
ENSMUSG00000102975	-2.11459	2.66798e-08	3.80853e-07	Gm37347
ENSMUSG00000103043	-2.65507	0.000147093	0.000886687	Gm37306
ENSMUSG00000103094	-3.0294	2.2616e-07	2.71392e-06	Gm37558
ENSMUSG00000103556	2.3977	1.43145e-23	1.27113e-21	Gm38215
ENSMUSG00000103593	-1.56241	2.10994e-05	0.00016085	Gm37352
ENSMUSG00000103711	1.24233	0.00614212	0.0210896	Tstd1
ENSMUSG00000103785	2.87665	1.28753e-13	4.38577e-12	Gm35025
ENSMUSG00000104348	-1.9712	1.88048e-18	1.03475e-16	Gm37691
ENSMUSG00000104351	-1.2969	0.00541088	0.0189271	Gm37125
ENSMUSG00000104367	-2.5202	1.65278e-12	4.69784e-11	Gm38079
ENSMUSG00000104517	-1.38962	0.013919	0.0412477	Gm18407
ENSMUSG00000104713	3.66577	5.01326e-07	5.65243e-06	Gbp6
ENSMUSG00000104955	3.86388	0.00167683	0.00708853	1700016F12Rik
ENSMUSG00000105383	1.37984	2.83883e-05	0.000207804	Gm42641
ENSMUSG00000105388	1.44516	0.00689878	0.0231807	Rpl36a-ps2
ENSMUSG00000105449	-1.53319	0.00447745	0.0160903	Gm43379
ENSMUSG00000105504	1.32442	5.87561e-05	0.000396511	Gbp5
ENSMUSG00000105646	-2.18199	5.60796e-05	0.000380043	Gm30211
ENSMUSG00000105703	-2.46496	5.09231e-12	1.34915e-10	Gm43305
ENSMUSG00000105954	-2.27071	7.67679e-07	8.29944e-06	Gm42793
ENSMUSG00000106219	-1.99836	0.000151887	0.000911321	5830416I19Rik
ENSMUSG00000106243	-3.06602	1.64248e-12	4.6789e-11	Gm5050
ENSMUSG00000106325	-3.38831	1.70111e-21	1.23748e-19	Ighv8-10
ENSMUSG00000106518	-2.05934	1.38522e-05	0.000111011	Gm42759
ENSMUSG00000107304	1.0888	0.00569207	0.0197444	Gm43775
ENSMUSG00000107317	1.25681	1.73762e-05	0.000135927	Gm19719
ENSMUSG00000107624	-2.29434	0.000325083	0.00175431	Gm44005
ENSMUSG00000107846	-2.41436	0.000109957	0.000685953	Gm43963
ENSMUSG00000108015	-2.24567	2.31774e-08	3.33072e-07	Gm32591
ENSMUSG00000108024	-1.3296	0.00670449	0.0226461	Gm43912
ENSMUSG00000108059	-2.19266	2.3778e-05	0.000178418	Gm44369
ENSMUSG00000108268	-1.01782	0.00248958	0.00985122	Gm44187
ENSMUSG00000108347	1.82162	0.0103803	0.0324883	Gm19187
ENSMUSG00000108360	-1.86868	0.000198342	0.0011442	Gm36159
ENSMUSG00000108368	-2.15465	1.91178e-10	4.00262e-09	Gm45053
ENSMUSG00000108382	-1.40338	0.0113091	0.034778	4930448A20Rik
ENSMUSG00000108709	-1.56546	0.000841322	0.00393493	4933431G14Rik
ENSMUSG00000108714	-1.75246	3.20836e-06	2.98273e-05	Gm21057
ENSMUSG00000108859	-2.05054	0.00209007	0.00852886	Gm44776
ENSMUSG00000109305	-2.87132	1.73422e-05	0.000135744	1810010D01Rik
ENSMUSG00000109556	-1.56108	3.07623e-11	7.29458e-10	Gm38843
ENSMUSG00000109669	-1.781	7.13136e-16	3.11266e-14	Gm45472
ENSMUSG00000109719	-2.04171	0.000434708	0.00224341	Gm45266
ENSMUSG00000109807	-1.75337	2.79497e-10	5.74889e-09	Gm45244
ENSMUSG00000109819	-1.43034	0.0127359	0.038288	B930018H19Rik
ENSMUSG00000109921	-1.64509	4.62525e-13	1.42135e-11	Gm33326
ENSMUSG00000110125	1.13443	4.81586e-08	6.62489e-07	Gm33148
ENSMUSG00000110344	1.0976	0.000398658	0.00208494	Gm45716
ENSMUSG00000110350	-1.05126	2.88227e-08	4.08274e-07	Gm10252
ENSMUSG00000110357	-2.83708	1.37693e-06	1.41157e-05	A030001D20Rik
ENSMUSG00000110386	-6.28667	5.40994e-66	4.35365e-63	Gm42031
ENSMUSG00000110391	-1.99895	0.00620565	0.0212699	Gm7269
ENSMUSG00000110498	-1.31293	4.66332e-09	7.83877e-08	A630001O12Rik
ENSMUSG00000110537	-1.71303	0.000549901	0.00273908	Gm4316
ENSMUSG00000110626	-1.37019	0.00834045	0.0271603	Gm45805
ENSMUSG00000110697	-1.29374	4.44659e-08	6.14977e-07	Gm31718
ENSMUSG00000110945	-2.00785	1.44598e-11	3.62933e-10	Gm9856
ENSMUSG00000111147	1.01306	0.00074257	0.00353643	AC160562.1
ENSMUSG00000111167	-2.47544	3.32654e-59	1.78469e-56	Gm39321
ENSMUSG00000111264	-1.78069	1.05942e-07	1.36548e-06	E030022I16Rik
ENSMUSG00000111329	-1.15926	0.00560399	0.0194861	A830035O19Rik
ENSMUSG00000111378	-3.43343	1.24131e-15	5.29242e-14	Gm47230
ENSMUSG00000111478	-1.00324	4.70556e-08	6.49398e-07	AC150314.1
ENSMUSG00000111514	-1.23846	3.98834e-11	9.32013e-10	E230014E18Rik
ENSMUSG00000111565	-1.90416	0.00131472	0.00576577	Gm34481
ENSMUSG00000111639	-2.22961	0.000130026	0.000794597	AC117245.2

## Sheet: Significabt DEGs_Spleen
SUPPLEMENTARY TABLE 3
DATA: DEGs of neutrophils isolated from the spleen of IL-1R1 KO mice compared to C57BL/6 mice
ID	log2FoldChange	pvalue	padj	Gene.name
ENSMUSG00000000120	-2.93547	5.99247e-08	1.61279e-06	Ngfr
ENSMUSG00000000142	-1.24647	0.00479348	0.0247347	Axin2
ENSMUSG00000000204	1.59783	3.29315e-08	9.50509e-07	Slfn4
ENSMUSG00000000320	-1.97593	4.23331e-05	0.000504376	Alox12
ENSMUSG00000000440	1.34713	0.00869654	0.039541	Pparg
ENSMUSG00000000531	-1.8185	3.75583e-08	1.06688e-06	Grasp
ENSMUSG00000000555	-1.03785	0.000167035	0.00159635	Itga5
ENSMUSG00000000562	2.25687	3.2295e-10	1.47539e-08	Adora3
ENSMUSG00000000594	-1.1155	9.20206e-07	1.83084e-05	Gm2a
ENSMUSG00000000617	-2.66486	3.74192e-06	6.12062e-05	Grm6
ENSMUSG00000000686	-2.09543	1.11443e-09	4.51824e-08	Abhd15
ENSMUSG00000000753	-1.66211	0.00311715	0.0176671	Serpinf1
ENSMUSG00000000791	1.0905	0.000200222	0.00186627	Il12rb1
ENSMUSG00000000861	-1.48295	5.62412e-16	7.20339e-14	Bcl11a
ENSMUSG00000000869	-2.31963	0.000146221	0.00143175	Il4
ENSMUSG00000000957	2.98196	2.329e-09	8.81516e-08	Mmp14
ENSMUSG00000000982	-1.71575	1.81269e-10	8.72587e-09	Ccl3
ENSMUSG00000001021	-1.29463	0.00619706	0.0302988	S100a3
ENSMUSG00000001025	1.84898	1.4131e-07	3.4517e-06	S100a6
ENSMUSG00000001027	-1.0029	0.000661899	0.00509933	Scn4a
ENSMUSG00000001036	-1.36567	0.000105563	0.00109573	Epn2
ENSMUSG00000001053	-1.25281	0.000139871	0.001379	N4bp3
ENSMUSG00000001249	1.79756	7.52687e-05	0.000827379	Hpn
ENSMUSG00000001288	-1.89573	1.30268e-14	1.31598e-12	Rarg
ENSMUSG00000001300	-1.59018	0.000885169	0.00645868	Efnb2
ENSMUSG00000001444	-1.20795	0.00149601	0.00988586	Tbx21
ENSMUSG00000001552	-1.03847	5.53899e-10	2.42246e-08	Jup
ENSMUSG00000001663	-1.58597	0.00493411	0.0253155	Gstt1
ENSMUSG00000001763	1.49441	0.000834856	0.00616684	Tspan33
ENSMUSG00000002007	-1.14414	2.31039e-05	0.000299391	Srpk3
ENSMUSG00000002068	1.71357	9.13794e-09	3.02734e-07	Ccne1
ENSMUSG00000002100	-1.25126	2.58976e-07	5.93453e-06	Mybpc3
ENSMUSG00000002103	1.19405	1.77714e-06	3.21296e-05	Acp2
ENSMUSG00000002105	-1.17002	1.58597e-07	3.81085e-06	Slc39a13
ENSMUSG00000002379	1.1581	0.000218989	0.00201243	Ndufa11
ENSMUSG00000002504	-1.88208	3.18571e-07	7.14048e-06	Slc9a3r2
ENSMUSG00000002617	1.0289	0.00902843	0.0407529	Zfp40
ENSMUSG00000002847	-1.97996	0.000299148	0.00261663	Pla1a
ENSMUSG00000002985	2.0147	5.61699e-06	8.74872e-05	Apoe
ENSMUSG00000003032	-1.19358	1.55821e-07	3.76419e-06	Klf4
ENSMUSG00000003161	1.03473	6.80835e-10	2.93291e-08	Sri
ENSMUSG00000003228	-1.51283	8.3485e-12	5.20693e-10	Grk5
ENSMUSG00000003379	-1.33489	1.81047e-08	5.50236e-07	Cd79a
ENSMUSG00000003469	1.76508	0.000801885	0.00595787	Phyhip
ENSMUSG00000003534	-2.05517	0.000429278	0.00355337	Ddr1
ENSMUSG00000003545	-2.0233	1.56549e-09	6.11906e-08	Fosb
ENSMUSG00000003575	-1.12462	1.14635e-07	2.87872e-06	Crtc1
ENSMUSG00000003585	1.19345	0.00863347	0.0392916	Sec14l2
ENSMUSG00000003617	1.97136	2.58573e-09	9.58459e-08	Cp
ENSMUSG00000003746	-1.15677	3.22527e-09	1.1654e-07	Man1a
ENSMUSG00000003824	1.27373	0.00281386	0.0162958	Syce2
ENSMUSG00000003849	1.60711	3.49239e-07	7.73122e-06	Nqo1
ENSMUSG00000003882	1.34033	9.13427e-05	0.000965623	Il7r
ENSMUSG00000004032	2.09899	2.64427e-05	0.000337174	Gstm5
ENSMUSG00000004110	-1.86782	1.50708e-08	4.72033e-07	Cacna1e
ENSMUSG00000004328	1.42279	0.00687827	0.0328458	Hif3a
ENSMUSG00000004359	1.91373	0.000559029	0.00440378	Spic
ENSMUSG00000004558	1.06941	0.00500686	0.0255964	Ndrg2
ENSMUSG00000004655	1.41091	0.00607745	0.0298872	Aqp1
ENSMUSG00000004668	1.65408	0.00351453	0.0195184	Abca13
ENSMUSG00000004698	-1.63768	4.17884e-07	9.11025e-06	Hdac9
ENSMUSG00000004768	1.3149	1.10399e-10	5.47982e-09	Rab23
ENSMUSG00000004837	-1.17312	4.16711e-05	0.000498143	Grap
ENSMUSG00000004864	1.52325	6.62497e-08	1.76645e-06	Mapk13
ENSMUSG00000004902	-1.42797	0.00264907	0.0155518	Slc25a18
ENSMUSG00000004951	-2.12107	1.77507e-06	3.21296e-05	Hspb1
ENSMUSG00000005057	-1.87118	1.22519e-08	3.93183e-07	Sh2b2
ENSMUSG00000005161	1.28792	0.000254027	0.00229183	Prdx2
ENSMUSG00000005237	2.21631	1.31711e-05	0.000183081	Dnah2
ENSMUSG00000005268	1.86046	0.0027317	0.0159528	Prlr
ENSMUSG00000005339	-1.79753	9.76054e-05	0.00102201	Fcer1a
ENSMUSG00000005364	-1.86679	2.31098e-06	4.03157e-05	Il5ra
ENSMUSG00000005397	-3.12359	1.08921e-10	5.42524e-09	Nid1
ENSMUSG00000005465	-1.84172	4.08585e-12	2.62832e-10	Il27ra
ENSMUSG00000005540	-2.95591	2.65112e-20	6.03656e-18	Fcer2a
ENSMUSG00000005583	-1.58175	5.51054e-07	1.16591e-05	Mef2c
ENSMUSG00000005774	-1.08022	0.000238028	0.00216519	Rfx5
ENSMUSG00000005800	1.66469	2.31112e-06	4.03157e-05	Mmp8
ENSMUSG00000005803	1.12889	2.08218e-06	3.69207e-05	Sqor
ENSMUSG00000005824	-1.20714	7.20391e-10	3.06647e-08	Tnfsf14
ENSMUSG00000006154	-2.00839	2.49209e-06	4.30712e-05	Eps8l1
ENSMUSG00000006179	2.27337	6.35153e-19	1.15333e-16	Prss16
ENSMUSG00000006235	1.2865	0.000722565	0.00544963	Epor
ENSMUSG00000006310	-1.7428	1.8631e-06	3.34914e-05	Zbtb32
ENSMUSG00000006344	1.00542	3.77482e-05	0.000458897	Ggt5
ENSMUSG00000006345	4.0585	3.40203e-32	2.12183e-29	Ggt1
ENSMUSG00000006362	-1.95524	2.15122e-12	1.48362e-10	Cbfa2t3
ENSMUSG00000006445	-1.83401	0.00114508	0.00790859	Epha2
ENSMUSG00000006567	2.14721	5.5907e-05	0.000643132	Atp7b
ENSMUSG00000006575	1.58383	3.22716e-06	5.35806e-05	Rundc3a
ENSMUSG00000006715	1.04839	0.00094931	0.00682704	Gmnn
ENSMUSG00000007659	1.16318	1.29013e-05	0.000180029	Bcl2l1
ENSMUSG00000007783	3.36412	0.000127068	0.00127211	Cpt1c
ENSMUSG00000007872	-1.44348	0.000113881	0.00116355	Id3
ENSMUSG00000008193	-1.79749	6.15197e-16	7.80973e-14	Spib
ENSMUSG00000008398	-1.45076	5.86291e-14	5.40337e-12	Elk3
ENSMUSG00000008843	2.06225	8.28641e-05	0.000895095	Cldn13
ENSMUSG00000009185	2.93853	5.92332e-07	1.24589e-05	Ccl8
ENSMUSG00000009246	-1.41051	0.000535172	0.0042615	Trpm5
ENSMUSG00000009248	-1.74931	0.000127078	0.00127211	Ascl2
ENSMUSG00000009350	2.78182	9.55909e-34	8.06618e-31	Mpo
ENSMUSG00000009418	-1.77361	9.22146e-05	0.000973377	Nav1
ENSMUSG00000009621	-1.34944	9.12933e-12	5.66927e-10	Vav2
ENSMUSG00000009628	-1.52326	0.00125703	0.00856223	Tex15
ENSMUSG00000009876	1.80779	0.00289283	0.0166523	Cox4i2
ENSMUSG00000010307	1.51315	7.81876e-06	0.000117127	Tmem86a
ENSMUSG00000010342	1.92266	0.000537647	0.00427525	Tex14
ENSMUSG00000010663	1.37706	1.07864e-09	4.40829e-08	Fads1
ENSMUSG00000010751	-1.0335	0.00093528	0.0067415	Tnfrsf22
ENSMUSG00000011114	1.17641	4.0568e-11	2.21273e-09	Tbrg1
ENSMUSG00000011263	1.136	0.00876042	0.0398062	Exoc3l2
ENSMUSG00000012519	1.54561	7.46101e-07	1.52679e-05	Mlkl
ENSMUSG00000012705	-1.38724	9.72303e-05	0.00101988	Retn
ENSMUSG00000013236	-1.35722	1.41503e-05	0.000194991	Ptprs
ENSMUSG00000013353	-2.51024	0.00360642	0.0198824	4931406B18Rik
ENSMUSG00000013707	1.1936	0.000222118	0.00203466	Tnfaip8l2
ENSMUSG00000014030	-1.6059	3.09305e-10	1.42668e-08	Pax5
ENSMUSG00000014158	1.73116	0.000114887	0.00117132	Trpv4
ENSMUSG00000014361	2.04012	1.76236e-08	5.36754e-07	Mertk
ENSMUSG00000014453	-1.77295	7.32801e-22	1.94667e-19	Blk
ENSMUSG00000014599	-1.78519	1.27249e-12	9.15417e-11	Csf1
ENSMUSG00000014633	1.77967	4.87809e-11	2.61105e-09	Cmc2
ENSMUSG00000014782	2.51138	8.75661e-06	0.000128439	Plekhg4
ENSMUSG00000014786	-1.39464	0.000174041	0.0016509	Slc9a5
ENSMUSG00000015053	-1.5187	0.00242217	0.0144775	Gata2
ENSMUSG00000015217	1.2398	1.24118e-06	2.3489e-05	Hmgb3
ENSMUSG00000015312	-2.54098	2.45019e-24	8.57268e-22	Gadd45b
ENSMUSG00000015316	-1.51916	1.69094e-07	4.03603e-06	Slamf1
ENSMUSG00000015501	-1.48545	2.24126e-06	3.93043e-05	Hivep2
ENSMUSG00000015568	2.79837	1.21345e-09	4.86227e-08	Lpl
ENSMUSG00000015709	-1.48972	0.011288	0.04825	Arnt2
ENSMUSG00000015850	3.50805	1.66775e-36	1.70884e-33	Adamtsl4
ENSMUSG00000015854	2.35979	0.00360023	0.0198792	Cd5l
ENSMUSG00000015947	2.60519	4.21784e-07	9.15806e-06	Fcgr1
ENSMUSG00000015957	-2.08281	0.000118679	0.00120314	Wnt11
ENSMUSG00000016255	-2.04984	0.000435881	0.00359314	Tubb1
ENSMUSG00000016356	-1.2044	0.000666936	0.00513211	Col20a1
ENSMUSG00000016529	2.55045	2.55945e-14	2.48076e-12	Il10
ENSMUSG00000016541	1.12532	4.75058e-08	1.31305e-06	Atxn10
ENSMUSG00000017167	-2.50568	8.20437e-06	0.000121834	Cntnap1
ENSMUSG00000017499	1.03324	0.00298947	0.0171399	Cdc6
ENSMUSG00000017639	-1.32802	2.68168e-06	4.57961e-05	Rab11fip4
ENSMUSG00000017652	-1.03493	0.00166829	0.0108117	Cd40
ENSMUSG00000017716	1.12367	0.000802725	0.00596019	Birc5
ENSMUSG00000017830	1.25728	1.691e-15	2.00475e-13	Dhx58
ENSMUSG00000017832	1.46444	0.0067689	0.0324966	Hspb9
ENSMUSG00000017969	-2.87359	4.41556e-05	0.000522187	Ptgis
ENSMUSG00000018102	-1.21653	9.79633e-06	0.000142235	Hist1h2bc
ENSMUSG00000018168	-1.78456	7.81041e-08	2.04081e-06	Ikzf3
ENSMUSG00000018339	1.3135	2.00677e-05	0.000265319	Gpx3
ENSMUSG00000018340	-1.33814	5.4418e-09	1.88557e-07	Anxa6
ENSMUSG00000018378	-1.58851	1.65692e-10	8.02991e-09	Cuedc1
ENSMUSG00000018398	1.5494	0.000110343	0.00113143	2021-09-08
ENSMUSG00000018417	-1.98178	0.00021169	0.00195538	Myo1b
ENSMUSG00000018459	2.99879	2.58041e-07	5.92255e-06	Slc13a3
ENSMUSG00000018474	-1.46369	1.21339e-07	3.01143e-06	Chd3
ENSMUSG00000018476	-1.11421	0.00412122	0.022084	Kdm6b
ENSMUSG00000018566	1.89448	6.11077e-05	0.000695707	Slc2a4
ENSMUSG00000018593	-1.83346	5.40842e-07	1.14769e-05	Sparc
ENSMUSG00000018659	1.09392	6.13543e-06	9.45357e-05	Pnpo
ENSMUSG00000018698	-1.92774	1.48058e-07	3.60592e-06	Lhx1
ENSMUSG00000018727	-1.69641	0.0035563	0.0196846	Cpsf4l
ENSMUSG00000018752	1.06425	0.00290689	0.0167065	Tnfsfm13
ENSMUSG00000018924	-4.75246	2.12773e-26	8.97714e-24	Alox15
ENSMUSG00000018927	-1.44183	2.72677e-06	4.64003e-05	Ccl6
ENSMUSG00000019139	-1.11941	1.59893e-08	4.96963e-07	Isyna1
ENSMUSG00000019256	-1.71595	1.2702e-05	0.00017794	Ahr
ENSMUSG00000019301	-1.59493	0.000783297	0.00583709	Hsd17b1
ENSMUSG00000019467	1.82993	3.76156e-05	0.000457673	Arhgef25
ENSMUSG00000019528	1.64492	1.04407e-13	9.41959e-12	Gyg
ENSMUSG00000019773	1.01516	2.27429e-05	0.000295781	Fbxo5
ENSMUSG00000019790	1.23388	0.00010727	0.00110863	Stxbp5
ENSMUSG00000019828	-2.20733	1.39785e-07	3.42187e-06	Grm1
ENSMUSG00000019864	-1.87724	4.69416e-19	8.74516e-17	Rtn4ip1
ENSMUSG00000019872	1.34766	7.69517e-18	1.22653e-15	Smpdl3a
ENSMUSG00000019992	1.00959	3.48554e-05	0.000427351	Mtfr2
ENSMUSG00000019996	-1.23715	2.97754e-06	5.01913e-05	Map7
ENSMUSG00000020003	1.1831	8.18381e-06	0.000121655	Pex7
ENSMUSG00000020017	1.14319	0.00419004	0.0223609	Hal
ENSMUSG00000020072	-2.17699	5.08628e-06	7.99152e-05	Pbld2
ENSMUSG00000020089	1.07613	0.000271913	0.00241972	Ppa1
ENSMUSG00000020108	1.03962	7.73043e-06	0.000116118	Ddit4
ENSMUSG00000020125	3.15852	7.67507e-37	8.46915e-34	Elane
ENSMUSG00000020135	-1.82186	0.000660477	0.00509658	Apc2
ENSMUSG00000020150	-1.26089	0.00817609	0.0376791	Gamt
ENSMUSG00000020151	2.96626	2.35848e-05	0.000304796	Ptprr
ENSMUSG00000020160	-1.98993	0.00356981	0.0197489	Meis1
ENSMUSG00000020183	-1.28819	3.32486e-08	9.57732e-07	Cpm
ENSMUSG00000020275	-1.32035	0.000282452	0.00249647	Rel
ENSMUSG00000020279	-3.53254	3.33697e-48	9.57378e-45	Il9r
ENSMUSG00000020282	-1.92495	2.63207e-16	3.56198e-14	Rhbdf1
ENSMUSG00000020333	3.321	9.39501e-06	0.000136824	Acsl6
ENSMUSG00000020377	-1.64511	0.0051647	0.0261701	Ltc4s
ENSMUSG00000020388	1.57426	0.0085757	0.0391138	Pdlim4
ENSMUSG00000020401	-1.59257	0.0111232	0.047773	Fam71b
ENSMUSG00000020407	2.54875	3.45392e-16	4.54556e-14	Upp1
ENSMUSG00000020423	-1.42269	1.16361e-11	7.04303e-10	Btg2
ENSMUSG00000020424	-1.13748	4.61545e-05	0.000544031	Gatsl3
ENSMUSG00000020427	-5.34072	4.70145e-06	7.47697e-05	Igfbp3
ENSMUSG00000020481	5.61013	1.65044e-14	1.64299e-12	Ankrd36
ENSMUSG00000020566	4.00395	1.0699e-06	2.06842e-05	Atp6v1c2
ENSMUSG00000020572	1.02527	4.34004e-05	0.00051538	Nampt
ENSMUSG00000020635	1.23629	0.00354031	0.0196235	Fkbp1b
ENSMUSG00000020638	1.4932	3.45063e-07	7.65059e-06	Cmpk2
ENSMUSG00000020644	1.50254	1.00475e-07	2.55553e-06	Id2
ENSMUSG00000020646	1.42586	0.00772075	0.0360059	Mboat2
ENSMUSG00000020649	1.08389	0.00143463	0.00956752	Rrm2
ENSMUSG00000020654	-1.17534	1.10287e-07	2.78532e-06	Adcy3
ENSMUSG00000020681	-4.84631	1.41288e-25	5.79081e-23	Ace
ENSMUSG00000020709	1.36442	0.000575301	0.00451213	Adap2
ENSMUSG00000020734	-2.40394	1.64596e-06	3.01935e-05	Grin2c
ENSMUSG00000020803	1.04021	0.000818442	0.00606433	Txndc17
ENSMUSG00000020826	2.14436	0.000252112	0.00228174	Nos2
ENSMUSG00000020834	1.29377	0.00116318	0.00800515	Dhrs13
ENSMUSG00000020844	1.2207	2.61881e-05	0.000334522	Nxn
ENSMUSG00000020866	-3.67128	6.27399e-06	9.63602e-05	Cacna1g
ENSMUSG00000020878	1.05386	0.00205163	0.0126747	Lrrc46
ENSMUSG00000020895	1.34633	0.00324181	0.0182439	Tmem107
ENSMUSG00000020926	-2.1492	0.000348069	0.00297737	Adam11
ENSMUSG00000020953	-4.49509	2.59306e-20	5.99958e-18	Coch
ENSMUSG00000020963	-2.43744	6.87286e-06	0.00010444	Tshr
ENSMUSG00000021007	1.40171	0.00126867	0.00863337	Spata7
ENSMUSG00000021024	1.01265	0.000263219	0.00235992	Psma6
ENSMUSG00000021062	4.94091	2.26753e-25	8.79128e-23	Rab15
ENSMUSG00000021087	-2.25445	9.72597e-05	0.00101988	Rtn1
ENSMUSG00000021094	1.03067	2.08514e-05	0.000274164	Dhrs7
ENSMUSG00000021118	2.37431	2.78808e-06	4.73874e-05	Plek2
ENSMUSG00000021123	1.66246	4.22655e-10	1.89468e-08	Rdh12
ENSMUSG00000021190	1.26421	0.00168347	0.0108928	Lgmn
ENSMUSG00000021223	-1.67925	0.00123316	0.00843572	Papln
ENSMUSG00000021234	-1.37615	0.00857097	0.0391065	Fam161b
ENSMUSG00000021242	1.03288	0.000432069	0.00356824	Npc2
ENSMUSG00000021250	-1.46817	8.52089e-08	2.20636e-06	Fos
ENSMUSG00000021257	-1.00169	8.80005e-05	0.000939261	Angel1
ENSMUSG00000021266	1.10371	2.08395e-05	0.000274164	Wars
ENSMUSG00000021273	1.08913	1.32751e-05	0.000183815	Fdft1
ENSMUSG00000021278	-1.89526	2.95288e-05	0.000371896	Amn
ENSMUSG00000021298	-1.31798	1.66732e-08	5.12326e-07	Gpr132
ENSMUSG00000021322	1.1411	0.000279776	0.00247587	Aoah
ENSMUSG00000021338	-2.1656	7.4394e-07	1.52626e-05	Carmil1
ENSMUSG00000021356	-1.43636	2.32175e-11	1.35388e-09	Irf4
ENSMUSG00000021367	1.79464	0.000415579	0.00345794	Edn1
ENSMUSG00000021411	-2.16856	2.31109e-13	1.87303e-11	Pxdc1
ENSMUSG00000021466	-1.29519	0.000513636	0.00412779	Ptch1
ENSMUSG00000021477	1.29523	7.32305e-08	1.92751e-06	Ctsl
ENSMUSG00000021486	1.07387	0.00022197	0.00203466	Prelid1
ENSMUSG00000021492	-1.75971	5.56999e-06	8.70387e-05	F12
ENSMUSG00000021552	1.2664	0.000930005	0.00671749	Gkap1
ENSMUSG00000021556	1.21252	2.69554e-07	6.14746e-06	Golm1
ENSMUSG00000021565	1.65947	0.00345405	0.0192421	Slc6a19
ENSMUSG00000021576	1.00878	5.42309e-06	8.48356e-05	Pdcd6
ENSMUSG00000021611	-1.8637	0.000302858	0.00263622	Tert
ENSMUSG00000021624	-1.5468	2.08657e-14	2.03618e-12	Cd180
ENSMUSG00000021646	-1.13255	0.000657388	0.00508368	Mccc2
ENSMUSG00000021687	1.54472	2.47896e-08	7.28703e-07	Scamp1
ENSMUSG00000021708	-1.03846	0.00533059	0.0268024	Rasgrf2
ENSMUSG00000021714	1.40606	0.000351892	0.00300113	Cenpk
ENSMUSG00000021759	1.30555	9.55919e-05	0.00100459	Plpp1
ENSMUSG00000021792	1.02115	0.000644345	0.0049882	Fam213a
ENSMUSG00000021838	-1.59953	0.00450908	0.0235982	Samd4
ENSMUSG00000021871	1.64305	3.36072e-09	1.20826e-07	Pnp
ENSMUSG00000021879	-2.13023	0.00433727	0.0229418	Dnah12
ENSMUSG00000021932	1.12828	0.00010166	0.00106023	Rnaseh2b
ENSMUSG00000021957	1.01475	0.000144861	0.00142169	Tkt
ENSMUSG00000021996	1.16428	1.92705e-05	0.000256671	Esd
ENSMUSG00000022037	-2.21017	3.21628e-06	5.34619e-05	Clu
ENSMUSG00000022041	-1.76619	2.61977e-09	9.68571e-08	Chrna2
ENSMUSG00000022043	-1.00665	4.39906e-06	7.05078e-05	Trim35
ENSMUSG00000022057	-1.57031	0.000402003	0.00336449	Adamdec1
ENSMUSG00000022098	1.31453	0.0115832	0.0491745	Bmp1
ENSMUSG00000022114	-2.11346	3.0878e-16	4.13967e-14	Spry2
ENSMUSG00000022126	-1.0359	0.00521429	0.0263655	Acod1
ENSMUSG00000022132	-1.46464	0.0013162	0.0088977	Cldn10
ENSMUSG00000022176	-2.12741	0.000120521	0.00121837	Rem2
ENSMUSG00000022211	-1.99143	0.0052744	0.0265944	Carmil3
ENSMUSG00000022225	-3.49239	3.80005e-08	1.07731e-06	Cma1
ENSMUSG00000022231	-2.96207	1.61197e-08	4.99431e-07	Sema5a
ENSMUSG00000022240	-3.61912	2.07193e-05	0.000273179	Ctnnd2
ENSMUSG00000022305	3.35874	1.08027e-22	3.16255e-20	Lrp12
ENSMUSG00000022346	-1.70767	2.73074e-23	8.70501e-21	Myc
ENSMUSG00000022351	1.38909	1.14563e-06	2.19413e-05	Sqle
ENSMUSG00000022353	-1.06191	4.5808e-07	9.83707e-06	Mtss1
ENSMUSG00000022371	-6.99822	4.80712e-09	1.67374e-07	Col14a1
ENSMUSG00000022372	1.40148	9.55357e-09	3.13606e-07	Sla
ENSMUSG00000022415	1.29818	0.000133596	0.00132717	Syngr1
ENSMUSG00000022416	-1.16027	0.00141153	0.00944422	Cacna1i
ENSMUSG00000022421	-1.8148	0.00571286	0.0284849	Nptxr
ENSMUSG00000022422	1.07249	0.00287094	0.0165463	Dscc1
ENSMUSG00000022425	-1.33677	0.00512519	0.0260055	Enpp2
ENSMUSG00000022436	-1.25823	5.30117e-17	7.45542e-15	Sh3bp1
ENSMUSG00000022456	-1.674	0.00103138	0.00726983	2021-09-03
ENSMUSG00000022490	-1.35099	0.000992859	0.00707529	Ppp1r1a
ENSMUSG00000022528	-1.36145	0.000468118	0.00380462	Hes1
ENSMUSG00000022534	-1.06989	5.9662e-05	0.000680868	Mefv
ENSMUSG00000022584	1.82259	2.44252e-09	9.12448e-08	Ly6c2
ENSMUSG00000022594	-2.5651	5.61232e-24	1.8723e-21	Lynx1
ENSMUSG00000022602	-1.05974	0.000870116	0.00637152	Arc
ENSMUSG00000022607	-1.20077	2.28302e-05	0.000296647	Ptk2
ENSMUSG00000022636	-1.2653	2.47561e-09	9.22406e-08	Alcam
ENSMUSG00000022651	1.57	8.9801e-08	2.31274e-06	Retnlg
ENSMUSG00000022659	-1.61644	3.8941e-07	8.55451e-06	Gcsam
ENSMUSG00000022672	-1.01322	0.000389431	0.00328225	Prkdc
ENSMUSG00000022742	1.25686	0.00860814	0.0392261	Cpox
ENSMUSG00000022797	1.10351	0.00143314	0.00956591	Tfrc
ENSMUSG00000022818	-2.80499	0.000351713	0.00300113	Cyp2ab1
ENSMUSG00000022836	-3.79995	1.71144e-19	3.36309e-17	Mylk
ENSMUSG00000022843	1.57312	2.2022e-08	6.56769e-07	Clcn2
ENSMUSG00000022865	-2.27157	1.84226e-08	5.58715e-07	Cxadr
ENSMUSG00000022885	-1.30345	3.12078e-10	1.43486e-08	St6gal1
ENSMUSG00000022902	6.89595	2.79723e-73	1.33754e-69	Stfa2
ENSMUSG00000022994	1.83467	0.000436026	0.00359314	Adcy6
ENSMUSG00000023022	-1.45588	9.98457e-06	0.000144822	Lima1
ENSMUSG00000023034	-1.97319	3.16096e-19	5.96632e-17	Nr4a1
ENSMUSG00000023039	-3.7121	1.85741e-24	6.66113e-22	Krt7
ENSMUSG00000023044	-1.4579	2.90774e-06	4.91881e-05	Csad
ENSMUSG00000023047	-2.0742	1.83019e-05	0.000245365	Amhr2
ENSMUSG00000023087	1.15244	1.48338e-07	3.60663e-06	Noct
ENSMUSG00000023132	-1.10693	0.00646642	0.0312496	Gzma
ENSMUSG00000023186	1.46498	5.58797e-15	6.21391e-13	Vwa5a
ENSMUSG00000023206	1.89685	1.76682e-13	1.48217e-11	Il15ra
ENSMUSG00000023224	-1.65099	0.00665374	0.0320295	Serping1
ENSMUSG00000023243	-1.09907	5.71208e-06	8.87755e-05	Kcnk5
ENSMUSG00000023345	1.09789	0.000103603	0.00107695	Poc1a
ENSMUSG00000023473	1.25487	0.000920437	0.00666516	Celsr3
ENSMUSG00000023495	-1.3543	2.07861e-05	0.000273808	Pcbp4
ENSMUSG00000023505	1.13323	0.000287825	0.00253459	Cdca3
ENSMUSG00000023886	-2.87281	1.0599e-06	2.06174e-05	Smoc2
ENSMUSG00000023912	-1.3901	0.00452394	0.0236385	Slc25a27
ENSMUSG00000023926	1.78032	0.000699877	0.00532048	Rhag
ENSMUSG00000023951	-1.26385	1.72501e-05	0.000233371	Vegfa
ENSMUSG00000023961	1.30184	2.79798e-10	1.30315e-08	Enpp4
ENSMUSG00000023963	-2.47856	7.30763e-12	4.59771e-10	Cyp39a1
ENSMUSG00000023982	1.59346	0.00148548	0.00983806	Guca1a
ENSMUSG00000023992	1.68489	0.00302309	0.0172499	Trem2
ENSMUSG00000024008	-1.16601	0.00250603	0.0148857	Cpne5
ENSMUSG00000024014	-1.28652	2.44563e-07	5.64028e-06	Pim1
ENSMUSG00000024065	-1.17523	7.54253e-06	0.000113772	Ehd3
ENSMUSG00000024074	-1.0141	3.44823e-05	0.0004235	Crim1
ENSMUSG00000024079	1.23452	5.67631e-06	8.83152e-05	Eif2ak2
ENSMUSG00000024085	1.45102	2.27584e-08	6.7592e-07	Man2a1
ENSMUSG00000024140	-1.85974	4.19131e-05	0.000500619	Epas1
ENSMUSG00000024155	4.50451	3.98296e-06	6.47062e-05	Meiob
ENSMUSG00000024190	-1.1644	0.000122354	0.00123331	Dusp1
ENSMUSG00000024222	2.43067	6.90341e-20	1.47805e-17	Fkbp5
ENSMUSG00000024247	1.99305	0.00026565	0.0023743	Pkdcc
ENSMUSG00000024253	1.53192	1.10054e-07	2.78434e-06	Dync2li1
ENSMUSG00000024330	-1.06921	0.00277022	0.0161016	Col11a2
ENSMUSG00000024334	-1.06542	6.00665e-06	9.27507e-05	H2-Oa
ENSMUSG00000024338	1.03586	0.00116053	0.00799606	Psmb8
ENSMUSG00000024347	-2.36485	7.60198e-06	0.000114549	Psd2
ENSMUSG00000024381	-1.35582	4.31226e-06	6.93491e-05	Bin1
ENSMUSG00000024401	1.57473	2.67919e-06	4.57961e-05	Tnf
ENSMUSG00000024402	-2.05551	2.2916e-16	3.13076e-14	Lta
ENSMUSG00000024414	1.1561	0.000421607	0.00349997	Mrpl27
ENSMUSG00000024423	-1.01824	0.000284223	0.00250595	Impact
ENSMUSG00000024427	-1.85512	0.00198986	0.012373	Spry4
ENSMUSG00000024462	-1.13057	0.00109019	0.00760638	Gabbr1
ENSMUSG00000024521	-1.67171	1.76526e-21	4.5219e-19	Pmaip1
ENSMUSG00000024535	1.41278	0.00433249	0.0229334	Snx24
ENSMUSG00000024548	-1.53887	0.000209822	0.00194062	Setbp1
ENSMUSG00000024597	-1.52503	0.000261963	0.00235455	Slc12a2
ENSMUSG00000024613	-1.03411	1.54479e-06	2.86676e-05	Tcof1
ENSMUSG00000024617	-1.44408	0.00172062	0.0110882	Camk2a
ENSMUSG00000024644	1.51775	7.12527e-06	0.000107932	Cndp2
ENSMUSG00000024659	1.16028	5.35559e-08	1.46614e-06	Anxa1
ENSMUSG00000024665	1.13852	0.00402614	0.0216635	Fads2
ENSMUSG00000024669	-1.04634	4.96674e-05	0.000580668	Cd5
ENSMUSG00000024672	3.16532	2.72997e-09	9.99015e-08	Ms4a7
ENSMUSG00000024673	-1.84658	4.15207e-14	3.97077e-12	Ms4a1
ENSMUSG00000024679	3.25815	8.26913e-20	1.74442e-17	Ms4a6d
ENSMUSG00000024681	1.33187	3.80972e-05	0.000462747	Ms4a3
ENSMUSG00000024730	3.32475	0.00102003	0.00721514	Ms4a8a
ENSMUSG00000024732	1.32557	1.49355e-09	5.85381e-08	Ccdc86
ENSMUSG00000024786	2.63144	5.5024e-05	0.000633991	Majin
ENSMUSG00000024812	-1.33847	3.38732e-05	0.000417808	Tjp2
ENSMUSG00000024905	1.75889	1.30704e-12	9.3281e-11	Tesmin
ENSMUSG00000024907	1.76689	7.71542e-05	0.00084616	Gal
ENSMUSG00000024936	-1.40111	0.000209533	0.0019392	Kcnk7
ENSMUSG00000024939	1.0811	1.7699e-05	0.000238552	Fam89b
ENSMUSG00000024948	-1.01682	0.000133017	0.00132325	Map4k2
ENSMUSG00000024953	1.05411	0.000451066	0.00369534	Prdx5
ENSMUSG00000025008	-1.14252	0.000257788	0.00231993	Tctn3
ENSMUSG00000025037	1.80571	0.00381959	0.0208177	Maoa
ENSMUSG00000025044	2.25321	1.58344e-07	3.81085e-06	Msr1
ENSMUSG00000025085	-1.4419	1.92199e-06	3.44207e-05	Ablim1
ENSMUSG00000025150	2.95474	0.00269647	0.0157817	Cbr2
ENSMUSG00000025151	-2.22812	4.05357e-08	1.13571e-06	Maged1
ENSMUSG00000025163	-1.41267	8.59074e-06	0.000126524	Cd7
ENSMUSG00000025165	4.08915	3.68106e-09	1.32012e-07	Sectm1a
ENSMUSG00000025190	1.5593	5.4726e-22	1.48122e-19	Got1
ENSMUSG00000025213	-1.39828	0.00387081	0.0210728	Kazald1
ENSMUSG00000025231	-1.20195	5.56298e-08	1.50828e-06	Sufu
ENSMUSG00000025278	-1.49859	5.93324e-05	0.000677646	Flnb
ENSMUSG00000025318	1.04822	3.11149e-06	5.20784e-05	Jph3
ENSMUSG00000025352	-2.60016	4.74714e-11	2.55047e-09	Gdf11
ENSMUSG00000025355	2.60451	4.76256e-18	7.94406e-16	Mmp19
ENSMUSG00000025401	-2.02678	3.86881e-05	0.000467943	Myo1a
ENSMUSG00000025432	-2.4331	6.69076e-11	3.50288e-09	Avil
ENSMUSG00000025433	-2.79024	9.52819e-05	0.00100207	Crisp3
ENSMUSG00000025453	-1.81245	1.28607e-19	2.63552e-17	Nnt
ENSMUSG00000025464	1.09014	0.00460036	0.023971	Paox
ENSMUSG00000025466	1.52525	0.00663481	0.0319491	Fuom
ENSMUSG00000025489	-1.99787	1.50436e-12	1.05334e-10	Ifitm5
ENSMUSG00000025492	1.68171	3.8032e-10	1.72104e-08	Ifitm3
ENSMUSG00000025495	1.17838	0.000674107	0.00517116	Ptdss2
ENSMUSG00000025498	1.26755	1.3146e-08	4.17211e-07	Irf7
ENSMUSG00000025511	1.51666	0.00358978	0.0198441	Tspan4
ENSMUSG00000025533	1.00799	1.17456e-05	0.000166164	Asl
ENSMUSG00000025573	1.99835	4.74223e-07	1.01231e-05	6030468B19Rik
ENSMUSG00000025577	-2.16932	0.000269945	0.00240519	Cbx2
ENSMUSG00000025602	1.11781	0.000114519	0.00116924	Zfp202
ENSMUSG00000025650	-1.53833	9.27033e-06	0.000135558	Col7a1
ENSMUSG00000025742	-1.24675	2.71074e-09	9.94514e-08	Prps2
ENSMUSG00000025743	1.3817	0.000809854	0.00600691	Sdc3
ENSMUSG00000025854	2.24974	9.52222e-10	3.95931e-08	Fam20c
ENSMUSG00000025855	-1.71647	0.00355557	0.0196846	Prkar1b
ENSMUSG00000025867	-1.27643	0.000538793	0.00427997	Cplx2
ENSMUSG00000025887	2.96932	2.77921e-18	4.69032e-16	Casp12
ENSMUSG00000025888	1.12595	4.79227e-07	1.02147e-05	Casp1
ENSMUSG00000025950	1.09656	6.47207e-06	9.88731e-05	Idh1
ENSMUSG00000025964	-1.43722	6.55155e-05	0.000738272	Adam23
ENSMUSG00000025978	-1.22365	1.48914e-05	0.000203445	Rftn2
ENSMUSG00000025997	-1.99014	0.000222018	0.00203466	Ikzf2
ENSMUSG00000026003	1.38851	3.14098e-12	2.06685e-10	Acadl
ENSMUSG00000026028	1.12654	0.00189754	0.0119282	Trak2
ENSMUSG00000026047	1.06109	0.000472714	0.00383545	Kdelc1
ENSMUSG00000026080	-1.88608	4.92496e-13	3.778e-11	Chst10
ENSMUSG00000026088	1.49718	2.51737e-11	1.45683e-09	Mitd1
ENSMUSG00000026095	1.69972	3.07498e-08	8.91123e-07	Asnsd1
ENSMUSG00000026096	1.00864	7.44774e-07	1.52626e-05	Osgepl1
ENSMUSG00000026131	1.04423	0.00190947	0.0119927	Dst
ENSMUSG00000026167	-1.89405	0.00021626	0.00199245	Wnt10a
ENSMUSG00000026171	1.09412	1.91576e-06	3.4352e-05	Rnf25
ENSMUSG00000026198	1.24287	2.95859e-05	0.000372289	Abcb6
ENSMUSG00000026208	-2.59041	0.000672455	0.0051645	Des
ENSMUSG00000026220	-1.21735	0.0057967	0.0287729	Slc16a14
ENSMUSG00000026249	1.32094	4.22193e-07	9.15806e-06	Serpine2
ENSMUSG00000026271	-2.13225	3.19304e-33	2.29021e-30	Gpr35
ENSMUSG00000026279	1.21199	1.00996e-08	3.29268e-07	Thap4
ENSMUSG00000026283	1.03802	8.53944e-06	0.00012607	Ing5
ENSMUSG00000026317	1.00613	0.000132271	0.00131675	Cln8
ENSMUSG00000026321	1.90201	3.43159e-05	0.00042218	Tnfrsf11a
ENSMUSG00000026335	1.52364	8.4893e-18	1.33823e-15	Pam
ENSMUSG00000026347	-1.15762	2.73949e-07	6.22789e-06	Tmem163
ENSMUSG00000026358	1.85516	2.30191e-12	1.56497e-10	Rgs1
ENSMUSG00000026360	-1.31433	6.42719e-07	1.344e-05	Rgs2
ENSMUSG00000026385	1.04802	0.00315276	0.0178062	Dbi
ENSMUSG00000026389	1.41545	0.000232027	0.00211732	Steap3
ENSMUSG00000026390	3.02018	1.31902e-07	3.24551e-06	Marco
ENSMUSG00000026415	-2.46938	8.62838e-06	0.000126719	Fcamr
ENSMUSG00000026417	-1.60057	0.00016175	0.00155725	Pigr
ENSMUSG00000026447	-1.07104	0.000171365	0.00163012	Pik3c2b
ENSMUSG00000026463	1.42605	0.0107811	0.0466671	Atp2b4
ENSMUSG00000026473	1.20549	6.52773e-11	3.43251e-09	Glul
ENSMUSG00000026475	-1.68569	1.05336e-05	0.000151712	Rgs16
ENSMUSG00000026478	-1.12747	4.94509e-05	0.000578608	Lamc1
ENSMUSG00000026489	-1.36191	1.68115e-12	1.17068e-10	Coq8a
ENSMUSG00000026490	1.42094	0.00657805	0.031729	Cdc42bpa
ENSMUSG00000026496	-1.26124	7.12255e-10	3.04086e-08	Parp1
ENSMUSG00000026536	2.21716	4.96593e-10	2.19188e-08	Mnda
ENSMUSG00000026548	1.56693	0.00202972	0.0125881	Slamf9
ENSMUSG00000026556	-2.19827	1.07112e-09	4.39006e-08	Vangl2
ENSMUSG00000026594	-1.52974	1.46619e-18	2.5966e-16	Ralgps2
ENSMUSG00000026604	-3.42485	1.51326e-30	8.6831e-28	Ptpn14
ENSMUSG00000026616	-3.00938	5.22208e-37	6.81007e-34	Cr2
ENSMUSG00000026628	-1.58783	4.2424e-17	6.20991e-15	Atf3
ENSMUSG00000026639	-1.42348	2.5518e-06	4.38915e-05	Lamb3
ENSMUSG00000026650	-1.94978	0.00849483	0.0388476	Meig1
ENSMUSG00000026657	1.35663	0.000289213	0.00254525	Frmd4a
ENSMUSG00000026688	1.41355	0.00111721	0.00774972	Mgst3
ENSMUSG00000026728	1.17861	7.19055e-08	1.8996e-06	Vim
ENSMUSG00000026749	1.49459	1.0701e-15	1.3009e-13	Nek6
ENSMUSG00000026765	-1.37793	0.000598744	0.0046781	Lypd6b
ENSMUSG00000026768	-3.29793	4.24409e-09	1.49219e-07	Itga8
ENSMUSG00000026814	1.41341	1.05248e-05	0.000151712	Eng
ENSMUSG00000026815	1.72907	1.93686e-05	0.000257262	Gfi1b
ENSMUSG00000026826	-2.23991	2.14145e-21	5.38931e-19	Nr4a2
ENSMUSG00000026829	1.89041	3.79408e-06	6.19182e-05	Gbgt1
ENSMUSG00000026837	1.68959	2.78073e-10	1.29934e-08	Col5a1
ENSMUSG00000026866	-1.31157	1.43997e-10	7.07409e-09	Kynu
ENSMUSG00000026872	-1.24192	2.81788e-06	4.78372e-05	Zeb2
ENSMUSG00000026874	2.21548	1.36106e-09	5.36384e-08	Hc
ENSMUSG00000026895	1.19363	0.000400808	0.00335645	Ndufa8
ENSMUSG00000026896	1.20927	4.02675e-05	0.000483379	Ifih1
ENSMUSG00000026915	-1.32719	4.38181e-17	6.3492e-15	Strbp
ENSMUSG00000026921	1.10593	0.0103515	0.0451483	Egfl7
ENSMUSG00000026930	-1.33943	2.32106e-12	1.57055e-10	Gpsm1
ENSMUSG00000026955	1.05743	0.0004523	0.00370334	Sapcd2
ENSMUSG00000026981	-1.57093	4.36724e-09	1.528e-07	Il1rn
ENSMUSG00000026986	-1.86413	2.08207e-09	7.9646e-08	Hnmt
ENSMUSG00000027002	1.17781	0.000300109	0.00261854	Nckap1
ENSMUSG00000027068	1.14387	0.000542334	0.00429164	Dhrs9
ENSMUSG00000027072	-3.32901	9.89876e-18	1.54345e-15	Prg3
ENSMUSG00000027073	-1.37699	0.000510748	0.00410919	Prg2
ENSMUSG00000027160	1.06496	0.000120317	0.00121717	Ccdc34
ENSMUSG00000027175	1.39591	0.0015765	0.0103035	Tcp11l1
ENSMUSG00000027204	1.49467	0.00270004	0.0157961	Fbn1
ENSMUSG00000027246	-1.48106	1.03029e-07	2.61585e-06	Ell3
ENSMUSG00000027296	1.30845	0.010607	0.0461222	Itpka
ENSMUSG00000027297	-1.72791	1.24298e-10	6.14848e-09	Ltk
ENSMUSG00000027313	-2.18818	6.95494e-09	2.35303e-07	Chac1
ENSMUSG00000027314	-1.76069	0.00218291	0.0133137	Dll4
ENSMUSG00000027315	2.41445	2.75725e-08	8.05554e-07	Spint1
ENSMUSG00000027318	2.68889	5.5726e-08	1.50828e-06	Adam33
ENSMUSG00000027322	2.10936	5.88144e-06	9.10133e-05	Siglec1
ENSMUSG00000027347	-1.09482	1.62942e-09	6.33443e-08	Rasgrp1
ENSMUSG00000027359	1.38831	1.62249e-06	2.9801e-05	Slc27a2
ENSMUSG00000027368	-1.18677	8.02011e-07	1.62269e-05	Dusp2
ENSMUSG00000027378	1.13175	0.00258428	0.0152495	Nphp1
ENSMUSG00000027398	-2.16168	3.41984e-13	2.69547e-11	Il1b
ENSMUSG00000027401	-3.41626	3.76401e-11	2.06876e-09	Tgm3
ENSMUSG00000027454	1.53458	9.25626e-05	0.000976331	Gins1
ENSMUSG00000027487	-1.31042	0.0010162	0.0071987	Cdk5rap1
ENSMUSG00000027514	1.49305	3.44398e-07	7.64765e-06	Zbp1
ENSMUSG00000027544	-1.16317	9.39037e-06	0.000136824	Nfatc2
ENSMUSG00000027556	3.14458	5.73861e-08	1.54738e-06	Car1
ENSMUSG00000027611	1.284	0.00822259	0.0378297	Procr
ENSMUSG00000027695	1.08599	0.000641206	0.00497195	Pld1
ENSMUSG00000027737	-1.89684	1.33024e-09	5.27134e-08	Slc7a11
ENSMUSG00000027765	1.2647	3.37873e-08	9.71299e-07	P2ry1
ENSMUSG00000027857	-3.14861	2.61547e-08	7.65691e-07	Tshb
ENSMUSG00000027858	-2.00581	2.88735e-13	2.31391e-11	Tspan2
ENSMUSG00000027860	1.61527	4.30643e-05	0.000512237	Vangl1
ENSMUSG00000027863	-1.40292	2.09051e-07	4.90007e-06	Cd2
ENSMUSG00000027864	-2.60788	2.9684e-12	1.96229e-10	Ptgfrn
ENSMUSG00000027900	1.12803	2.9375e-07	6.63598e-06	Dram2
ENSMUSG00000027952	1.0133	0.000341264	0.00293583	Pmvk
ENSMUSG00000027962	1.58118	0.00326603	0.0183586	Vcam1
ENSMUSG00000028033	-1.21142	0.000568131	0.00446567	Kcnq5
ENSMUSG00000028037	1.47316	0.000679945	0.00519926	Ifi44
ENSMUSG00000028057	1.11944	4.83162e-05	0.00056706	Rit1
ENSMUSG00000028063	1.00929	0.00307489	0.017469	Lmna
ENSMUSG00000028108	3.2924	1.13219e-32	7.3824e-30	Ecm1
ENSMUSG00000028115	-2.86827	1.20238e-06	2.29668e-05	Bnipl
ENSMUSG00000028121	-1.74724	7.191e-28	3.22359e-25	Bcar3
ENSMUSG00000028124	1.00614	0.000376691	0.00318987	Gclm
ENSMUSG00000028132	2.17956	2.6663e-09	9.83241e-08	Tmem56
ENSMUSG00000028184	-1.40294	0.00181976	0.0116071	Adgrl2
ENSMUSG00000028211	1.20705	0.000423405	0.00351171	Trp53inp1
ENSMUSG00000028214	-1.44118	1.81258e-18	3.13271e-16	Gem
ENSMUSG00000028217	-1.28465	6.13266e-09	2.0946e-07	Cdh17
ENSMUSG00000028270	1.63691	1.16398e-05	0.000165314	Gbp2
ENSMUSG00000028332	1.35384	0.010194	0.0446377	Hemgn
ENSMUSG00000028339	-1.73847	0.000536101	0.00426532	Col15a1
ENSMUSG00000028341	-2.95134	1.12105e-09	4.53e-08	Nr4a3
ENSMUSG00000028347	-2.2222	0.000431261	0.00356567	Tmeff1
ENSMUSG00000028393	1.62521	5.39985e-05	0.000623678	Alad
ENSMUSG00000028412	-1.50464	1.08309e-08	3.50151e-07	Slc44a1
ENSMUSG00000028458	-1.06712	4.6673e-06	7.43915e-05	Tesk1
ENSMUSG00000028459	-1.41874	1.20653e-09	4.84808e-08	Cd72
ENSMUSG00000028469	-1.6156	0.00108636	0.00758339	Npr2
ENSMUSG00000028480	1.20762	1.69555e-09	6.57369e-08	Glipr2
ENSMUSG00000028517	-1.77249	3.967e-08	1.11582e-06	Plpp3
ENSMUSG00000028532	1.97731	0.00118445	0.00812187	Cachd1
ENSMUSG00000028545	-1.04457	0.00103165	0.00726983	Bend5
ENSMUSG00000028558	-4.89834	1.89629e-07	4.48882e-06	Calr4
ENSMUSG00000028573	2.12381	2.23796e-09	8.49301e-08	Fggy
ENSMUSG00000028634	-1.37582	2.6803e-05	0.00034086	Hivep3
ENSMUSG00000028654	-1.26485	0.00044712	0.0036693	Mycl
ENSMUSG00000028684	1.17738	9.11309e-05	0.000964777	Urod
ENSMUSG00000028701	-2.42239	1.06727e-06	2.06842e-05	Lurap1
ENSMUSG00000028717	1.40092	0.00193839	0.0121371	Tal1
ENSMUSG00000028763	-2.53723	7.55415e-16	9.34175e-14	Hspg2
ENSMUSG00000028789	1.51913	4.06018e-06	6.56633e-05	Azin2
ENSMUSG00000028792	1.05878	2.11466e-07	4.94859e-06	Ak2
ENSMUSG00000028859	-1.93361	3.96727e-11	2.17216e-09	Csf3r
ENSMUSG00000028927	-1.22344	2.00271e-05	0.000265027	Padi2
ENSMUSG00000028982	-1.58631	2.42522e-10	1.13692e-08	Slc25a33
ENSMUSG00000028988	2.37614	5.02862e-11	2.68162e-09	Ctnnbip1
ENSMUSG00000029049	-1.21559	0.000415298	0.00345761	Morn1
ENSMUSG00000029053	-1.97472	4.69646e-13	3.62208e-11	Prkcz
ENSMUSG00000029061	-1.56274	0.00705701	0.0334433	Mmp23
ENSMUSG00000029093	-1.6315	8.38634e-05	0.000903847	Sorcs2
ENSMUSG00000029136	1.15388	1.51376e-06	2.81645e-05	Rbks
ENSMUSG00000029163	1.01747	5.12899e-06	8.04103e-05	Emilin1
ENSMUSG00000029166	-1.27015	0.00038423	0.00324413	Mapre3
ENSMUSG00000029304	-1.50986	3.37667e-05	0.000416853	Spp1
ENSMUSG00000029309	-3.52549	3.83427e-05	0.000464941	Sparcl1
ENSMUSG00000029322	1.6476	1.4304e-06	2.67176e-05	Plac8
ENSMUSG00000029330	1.50028	0.00181177	0.0115716	Cds1
ENSMUSG00000029370	-2.6696	3.54972e-08	1.01638e-06	Rassf6
ENSMUSG00000029372	-1.99882	0.000407079	0.00339509	Ppbp
ENSMUSG00000029380	-1.24227	0.00209486	0.0128973	Cxcl1
ENSMUSG00000029406	-1.36273	1.14218e-06	2.19045e-05	Pitpnm2
ENSMUSG00000029417	1.23972	0.000327354	0.00282715	Cxcl9
ENSMUSG00000029438	-1.18448	8.64875e-08	2.23141e-06	Bcl7a
ENSMUSG00000029440	1.35249	2.18005e-06	3.84187e-05	Psmd9
ENSMUSG00000029468	1.19719	3.58226e-06	5.92022e-05	P2rx7
ENSMUSG00000029475	-1.12729	8.05643e-06	0.000120135	Kdm2b
ENSMUSG00000029477	-1.41924	0.00638683	0.0309733	Morn3
ENSMUSG00000029490	1.85244	1.40077e-05	0.000193212	Mfsd7a
ENSMUSG00000029534	1.30211	3.94956e-08	1.11309e-06	St7
ENSMUSG00000029553	2.44343	1.68369e-08	5.1608e-07	Tfec
ENSMUSG00000029564	-1.81625	1.14787e-07	2.87872e-06	4930519G04Rik
ENSMUSG00000029581	-2.27687	4.13584e-11	2.2473e-09	Fscn1
ENSMUSG00000029596	2.67849	6.57389e-05	0.000740208	Sdsl
ENSMUSG00000029602	-1.68626	3.77679e-17	5.58536e-15	Rasal1
ENSMUSG00000029603	-2.36532	8.54007e-38	1.22507e-34	Dtx1
ENSMUSG00000029649	1.19214	0.000126664	0.00126974	Pomp
ENSMUSG00000029661	-3.56424	1.49722e-08	4.69968e-07	Col1a2
ENSMUSG00000029699	1.35046	2.35707e-07	5.46239e-06	Ssc4d
ENSMUSG00000029716	1.59651	0.000928581	0.00671058	Tfr2
ENSMUSG00000029735	-1.2105	1.65493e-08	5.10538e-07	Tpk1
ENSMUSG00000029761	-1.55815	0.00836569	0.0383405	Cald1
ENSMUSG00000029772	-1.34816	1.00108e-14	1.03018e-12	Ahcyl2
ENSMUSG00000029780	1.73818	4.32473e-21	1.0515e-18	Nt5c3
ENSMUSG00000029797	-2.86295	4.9958e-05	0.000583114	Sspo
ENSMUSG00000029798	1.34883	8.89403e-05	0.000946476	Herc6
ENSMUSG00000029802	2.00455	1.07805e-06	2.08137e-05	Abcg2
ENSMUSG00000029804	-1.0059	0.000109784	0.00112893	Herc3
ENSMUSG00000029816	2.20624	0.00943566	0.0420878	Gpnmb
ENSMUSG00000029859	-1.44435	2.99898e-06	5.04934e-05	Epha1
ENSMUSG00000029869	-1.47022	6.30689e-05	0.000713504	Ephb6
ENSMUSG00000030064	1.78359	1.16624e-05	0.000165314	Frmd4b
ENSMUSG00000030067	-1.24583	7.29103e-11	3.74874e-09	Foxp1
ENSMUSG00000030069	2.63598	8.19889e-09	2.72884e-07	Prok2
ENSMUSG00000030089	1.27169	1.67986e-11	9.87606e-10	Slc41a3
ENSMUSG00000030098	-3.39719	2.87825e-14	2.77104e-12	Grip2
ENSMUSG00000030107	1.46621	6.21388e-11	3.30141e-09	Usp18
ENSMUSG00000030114	-1.77534	8.54237e-06	0.00012607	Klrg1
ENSMUSG00000030117	4.27044	7.64278e-11	3.90163e-09	Gdf3
ENSMUSG00000030134	-1.91171	0.000987449	0.00704724	Rasgef1a
ENSMUSG00000030147	2.1617	0.00210401	0.0129315	Clec4b1
ENSMUSG00000030158	-3.22948	3.41905e-07	7.60407e-06	Clec12b
ENSMUSG00000030162	-1.19832	0.00703781	0.0333854	Olr1
ENSMUSG00000030208	-2.11352	3.84644e-05	0.000466023	Emp1
ENSMUSG00000030217	1.20724	0.00781952	0.0363756	Art4
ENSMUSG00000030231	-1.07531	0.00370366	0.0203093	Plekha5
ENSMUSG00000030247	-2.35596	7.7254e-07	1.57416e-05	Kcnj8
ENSMUSG00000030255	-1.72176	4.06103e-05	0.000487086	Sspn
ENSMUSG00000030256	-1.52177	9.29564e-10	3.88764e-08	Bhlhe41
ENSMUSG00000030257	-1.40375	0.0019838	0.0123461	Srgap3
ENSMUSG00000030276	-1.04363	1.43594e-05	0.000197683	Ttll3
ENSMUSG00000030282	1.05799	2.84464e-05	0.00036048	Cmas
ENSMUSG00000030313	-1.00787	0.00609806	0.0299475	Dennd5b
ENSMUSG00000030345	-2.99906	3.93503e-06	6.40726e-05	Dyrk4
ENSMUSG00000030376	-4.96689	5.97128e-06	9.23039e-05	Slc8a2
ENSMUSG00000030380	1.51702	3.12821e-05	0.000391572	Mzf1
ENSMUSG00000030401	-1.32011	0.00620115	0.0303085	Rtn2
ENSMUSG00000030402	1.10535	0.00861382	0.0392325	Ppm1n
ENSMUSG00000030413	1.17587	0.000138777	0.00137104	Pglyrp1
ENSMUSG00000030465	-1.12272	0.00135634	0.009126	Psd3
ENSMUSG00000030468	-1.16694	7.50365e-11	3.84428e-09	Siglecg
ENSMUSG00000030528	1.06938	0.00107952	0.00755031	Blm
ENSMUSG00000030545	2.05217	1.33563e-08	4.2295e-07	Pex11a
ENSMUSG00000030559	1.43159	0.0087806	0.0398853	Rab38
ENSMUSG00000030577	-1.39315	2.03364e-10	9.65979e-09	Cd22
ENSMUSG00000030605	-2.44124	6.02283e-12	3.8229e-10	Mfge8
ENSMUSG00000030616	-1.105	0.0108727	0.0469644	Sytl2
ENSMUSG00000030691	-1.39393	1.05055e-08	3.41728e-07	Fchsd2
ENSMUSG00000030699	-1.52354	1.00488e-09	4.14222e-08	Tbx6
ENSMUSG00000030711	2.54639	3.4198e-05	0.00042109	Sult1a1
ENSMUSG00000030717	1.27726	0.00157292	0.0102891	Nupr1
ENSMUSG00000030724	-1.55116	3.11911e-15	3.57949e-13	Cd19
ENSMUSG00000030730	-1.36261	0.00644448	0.0311791	Atp2a1
ENSMUSG00000030745	-1.20495	1.94627e-07	4.58443e-06	Il21r
ENSMUSG00000030782	-1.55639	0.000789243	0.0058753	Tgfb1i1
ENSMUSG00000030787	-1.47199	0.00232313	0.0139968	Lyve1
ENSMUSG00000030789	-1.66654	6.83671e-15	7.37388e-13	Itgax
ENSMUSG00000030790	-2.80912	4.17151e-07	9.11025e-06	Adm
ENSMUSG00000030793	1.91578	3.73814e-09	1.33725e-07	Pycard
ENSMUSG00000030830	-1.20849	1.72608e-05	0.000233371	Itgal
ENSMUSG00000030838	2.37993	2.53476e-09	9.41998e-08	Ush1c
ENSMUSG00000030851	-1.82615	0.000124641	0.00125249	Ldhc
ENSMUSG00000030872	-1.62539	4.74111e-15	5.35521e-13	Gga2
ENSMUSG00000030882	-1.84355	2.5186e-11	1.45683e-09	Dnhd1
ENSMUSG00000030897	1.57775	1.95245e-05	0.000259093	Cnga4
ENSMUSG00000030917	-1.41284	1.04729e-06	2.04123e-05	Tmem159
ENSMUSG00000030966	1.22866	6.36236e-11	3.36782e-09	Trim21
ENSMUSG00000030968	5.81012	8.01053e-08	2.0855e-06	Pdilt
ENSMUSG00000031015	-1.87599	1.52593e-19	3.0402e-17	Swap70
ENSMUSG00000031066	-1.12885	1.92841e-08	5.82381e-07	Usp11
ENSMUSG00000031078	1.33051	0.000523458	0.00418329	Cttn
ENSMUSG00000031097	-1.56334	0.000520561	0.00417176	Tnni2
ENSMUSG00000031098	-1.3152	0.0105488	0.0459248	Syt8
ENSMUSG00000031129	-1.43572	1.1378e-06	2.18498e-05	Slc9a9
ENSMUSG00000031137	-1.50704	0.000107473	0.00110994	Fgf13
ENSMUSG00000031144	-1.2884	0.000405406	0.00338901	Syp
ENSMUSG00000031162	1.7155	0.000467982	0.00380462	Gata1
ENSMUSG00000031170	1.59102	0.000242996	0.00220479	Slc38a5
ENSMUSG00000031189	-1.53915	0.00710828	0.0336529	Aff2
ENSMUSG00000031227	-1.18816	0.0025212	0.0149634	Magee1
ENSMUSG00000031258	-1.23861	0.000109509	0.00112691	Xkrx
ENSMUSG00000031266	-1.32902	8.30459e-10	3.51414e-08	Gla
ENSMUSG00000031342	-1.82561	3.33467e-07	7.45107e-06	Gpm6b
ENSMUSG00000031355	-1.32349	0.000159839	0.00154441	Arhgap6
ENSMUSG00000031375	-2.81906	1.26251e-08	4.01567e-07	Bgn
ENSMUSG00000031379	1.22421	6.84833e-05	0.000763914	Pir
ENSMUSG00000031385	1.10355	0.000276609	0.00245542	Plxnb3
ENSMUSG00000031387	1.11632	0.00441252	0.0232114	Renbp
ENSMUSG00000031438	-1.61822	8.94569e-07	1.78727e-05	Rnf128
ENSMUSG00000031441	1.81014	7.37822e-07	1.51852e-05	Atp11a
ENSMUSG00000031443	2.98242	7.89297e-08	2.05863e-06	F7
ENSMUSG00000031444	2.21952	4.06608e-09	1.4402e-07	F10
ENSMUSG00000031453	-1.01204	1.62109e-05	0.000219797	Rasa3
ENSMUSG00000031480	-1.35131	3.13904e-05	0.000392585	Thsd1
ENSMUSG00000031486	-1.94385	1.05582e-05	0.000151763	Adgra2
ENSMUSG00000031494	-7.24891	1.85913e-08	5.62641e-07	Cd209a
ENSMUSG00000031502	-3.43482	1.41002e-12	9.96392e-11	Col4a1
ENSMUSG00000031519	1.83836	0.00113221	0.00783273	Asb5
ENSMUSG00000031523	-3.66129	6.44083e-06	9.85008e-05	Dlc1
ENSMUSG00000031530	-1.24581	0.00309961	0.0175816	Dusp4
ENSMUSG00000031555	1.03954	1.57488e-10	7.68425e-09	Adam9
ENSMUSG00000031565	-2.51151	6.51829e-06	9.94733e-05	Fgfr1
ENSMUSG00000031604	1.41774	6.73617e-10	2.91055e-08	Msmo1
ENSMUSG00000031610	2.32269	9.60718e-15	9.98659e-13	Scrg1
ENSMUSG00000031613	-1.60428	0.00913267	0.0410813	Hpgd
ENSMUSG00000031618	-1.81029	0.000795676	0.00592011	Nr3c2
ENSMUSG00000031626	-3.40416	5.83251e-13	4.40355e-11	Sorbs2
ENSMUSG00000031642	-1.1	0.00311877	0.0176693	Sh3rf1
ENSMUSG00000031681	1.05045	2.60022e-05	0.000332444	Smad1
ENSMUSG00000031698	1.34895	0.00767746	0.0358506	Mylk3
ENSMUSG00000031712	-1.14592	5.02005e-07	1.06844e-05	Il15
ENSMUSG00000031714	1.20843	0.00128867	0.00873752	Gab1
ENSMUSG00000031722	1.1478	5.7898e-06	8.97888e-05	Hp
ENSMUSG00000031758	-1.11774	5.08506e-06	7.99152e-05	Cdyl2
ENSMUSG00000031762	3.64161	1.9451e-16	2.68293e-14	Mt2
ENSMUSG00000031765	2.02467	4.79566e-05	0.000563421	Mt1
ENSMUSG00000031779	-1.83266	0.00072002	0.00544475	Ccl22
ENSMUSG00000031803	1.614	4.78065e-06	7.56936e-05	B3gnt3
ENSMUSG00000031825	2.08064	1.79951e-09	6.95793e-08	Crispld2
ENSMUSG00000031842	-1.34908	0.00942765	0.0420652	Pde4c
ENSMUSG00000031851	1.09021	1.21919e-06	2.31954e-05	Ntpcr
ENSMUSG00000031860	-1.22302	0.00115275	0.00795393	Pbx4
ENSMUSG00000031871	-2.22585	4.77993e-06	7.56936e-05	Cdh5
ENSMUSG00000031877	2.45997	2.9466e-10	1.36352e-08	Ces2g
ENSMUSG00000031886	2.95299	2.94057e-09	1.06791e-07	Ces2e
ENSMUSG00000031897	1.12342	0.00530588	0.0267156	Psmb10
ENSMUSG00000031906	-2.0982	6.95987e-06	0.000105538	Smpd3
ENSMUSG00000031925	-1.15093	3.7011e-06	6.06994e-05	Maml2
ENSMUSG00000031990	-2.83191	7.27877e-05	0.000803184	Jam3
ENSMUSG00000032009	-1.63258	2.90028e-12	1.92613e-10	Sesn3
ENSMUSG00000032014	1.42394	0.000369072	0.00312904	Oaf
ENSMUSG00000032033	6.05474	4.07966e-07	8.93476e-06	Barx2
ENSMUSG00000032035	-1.17129	1.4397e-08	4.539e-07	Ets1
ENSMUSG00000032036	-1.83182	0.000423511	0.00351171	Kirrel3
ENSMUSG00000032053	-1.02869	8.30698e-07	1.66896e-05	Pou2af1
ENSMUSG00000032122	-1.49682	6.77349e-11	3.5333e-09	Slc37a2
ENSMUSG00000032126	1.44091	0.00063536	0.00493729	Hmbs
ENSMUSG00000032135	1.58418	1.50529e-12	1.05334e-10	Mcam
ENSMUSG00000032177	-1.26109	9.31836e-09	3.06646e-07	Pde4a
ENSMUSG00000032184	-1.9935	7.18169e-05	0.000795531	Lysmd2
ENSMUSG00000032192	2.50117	2.58075e-29	1.27658e-26	Gnb5
ENSMUSG00000032193	1.53977	1.32617e-05	0.000183806	Ldlr
ENSMUSG00000032207	-3.05089	5.02998e-13	3.83803e-11	Lipc
ENSMUSG00000032218	1.18614	1.08094e-05	0.000154751	Ccnb2
ENSMUSG00000032220	-1.61165	3.69332e-13	2.87939e-11	Myo1e
ENSMUSG00000032261	-1.80842	0.000142165	0.00140065	Sh3bgrl2
ENSMUSG00000032285	-1.39645	0.000807994	0.00599621	Dnaja4
ENSMUSG00000032352	-1.11862	0.000116656	0.00118514	Lrrc1
ENSMUSG00000032377	-1.60851	0.00981962	0.0433359	Plscr4
ENSMUSG00000032412	1.10547	8.02141e-05	0.000870402	Atp1b3
ENSMUSG00000032420	-2.00728	1.41085e-06	2.63867e-05	Nt5e
ENSMUSG00000032446	-1.4541	4.25074e-05	0.000506032	Eomes
ENSMUSG00000032487	-4.43163	7.00183e-44	1.43488e-40	Ptgs2
ENSMUSG00000032507	2.23468	6.28848e-06	9.64793e-05	Fbxl2
ENSMUSG00000032515	-1.00769	1.57293e-06	2.90769e-05	Csrnp1
ENSMUSG00000032537	4.78485	3.04977e-06	5.12282e-05	Ephb1
ENSMUSG00000032549	-1.44003	0.000113633	0.00116184	Rab6b
ENSMUSG00000032556	-1.29002	0.0013483	0.00908042	Bfsp2
ENSMUSG00000032571	-1.511	2.05791e-13	1.6869e-11	Pik3r4
ENSMUSG00000032572	2.27276	0.00397294	0.0214873	Col6a4
ENSMUSG00000032640	-1.14654	4.07788e-07	8.93476e-06	Chsy1
ENSMUSG00000032648	-1.27652	3.67271e-06	6.04186e-05	Pygm
ENSMUSG00000032679	1.12038	0.000144708	0.00142169	Cd59a
ENSMUSG00000032691	-2.11557	7.14657e-08	1.89147e-06	Nlrp3
ENSMUSG00000032733	-1.04368	5.78371e-05	0.000661621	Snx33
ENSMUSG00000032827	-1.29034	0.00169636	0.0109614	Ppp1r9a
ENSMUSG00000032841	-2.67007	8.84294e-23	2.64275e-20	Prr5l
ENSMUSG00000032845	-1.56205	5.74898e-06	8.92522e-05	Alpk2
ENSMUSG00000032855	-1.17969	0.000676832	0.00518375	Pkd1
ENSMUSG00000032890	-1.47049	0.00239827	0.0143586	Rims3
ENSMUSG00000033024	-2.09826	0.000848849	0.00626054	Klra9
ENSMUSG00000033032	2.82739	3.69689e-08	1.05431e-06	Afap1l1
ENSMUSG00000033039	-1.08942	8.7164e-05	0.000932832	Micall1
ENSMUSG00000033059	-1.03438	1.9132e-06	3.43489e-05	Pygb
ENSMUSG00000033060	-1.72847	0.005174	0.0261989	Lmo7
ENSMUSG00000033065	1.06168	8.1752e-05	0.000885619	Pfkm
ENSMUSG00000033082	-3.72929	4.7862e-10	2.13224e-08	Clec1a
ENSMUSG00000033083	-2.28138	5.21456e-18	8.59803e-16	Tbc1d4
ENSMUSG00000033149	1.55484	0.000166208	0.00159163	Phldb2
ENSMUSG00000033170	-1.41373	6.57978e-05	0.000740289	Card10
ENSMUSG00000033191	-2.12397	0.000663405	0.00510818	Tie1
ENSMUSG00000033209	-1.76241	5.75242e-05	0.000659093	Ttc28
ENSMUSG00000033213	1.15965	0.000507786	0.00408995	AA467197
ENSMUSG00000033255	-1.14488	0.0110913	0.0477074	Gm5134
ENSMUSG00000033276	1.75261	1.77309e-07	4.21806e-06	Stk36
ENSMUSG00000033355	1.16995	1.06967e-06	2.06842e-05	Rtp4
ENSMUSG00000033373	1.00633	7.71452e-08	2.02312e-06	Fntb
ENSMUSG00000033427	-1.91383	0.000491547	0.00397029	Upb1
ENSMUSG00000033436	-1.14697	1.06213e-06	2.06174e-05	Armcx2
ENSMUSG00000033508	1.22326	0.000828576	0.006131	Asprv1
ENSMUSG00000033554	-1.0368	0.000342121	0.00293766	Dph5
ENSMUSG00000033577	-1.72712	2.01201e-09	7.73789e-08	Myo6
ENSMUSG00000033684	2.05817	5.5812e-29	2.66874e-26	Qsox1
ENSMUSG00000033730	-1.58511	0.00156161	0.0102289	Egr3
ENSMUSG00000033763	-1.79714	0.00107169	0.00750652	Mtss1l
ENSMUSG00000033825	-6.33766	4.67374e-09	1.63126e-07	Tpsb2
ENSMUSG00000033847	4.12266	1.11048e-14	1.12978e-12	Pla2g4c
ENSMUSG00000033855	4.10631	1.10242e-11	6.73807e-10	Ston1
ENSMUSG00000033863	1.74408	5.45742e-05	0.000629315	Klf9
ENSMUSG00000033880	1.94676	7.06207e-18	1.13826e-15	Lgals3bp
ENSMUSG00000033917	1.15495	9.88487e-09	3.23003e-07	Gde1
ENSMUSG00000033938	1.01128	0.00203164	0.0125946	Ndufb7
ENSMUSG00000033949	-1.05307	0.00422596	0.0225275	Trim36
ENSMUSG00000034101	2.35948	1.57985e-06	2.91673e-05	Ctnnd1
ENSMUSG00000034118	1.33138	5.06758e-10	2.22989e-08	Tpst1
ENSMUSG00000034164	-1.50404	4.45139e-10	1.98926e-08	Emid1
ENSMUSG00000034177	-2.27041	1.14632e-09	4.61909e-08	Rnf43
ENSMUSG00000034201	-1.22475	0.00109467	0.00762656	Gas2l1
ENSMUSG00000034285	-1.00726	0.000136919	0.00135456	Nipsnap1
ENSMUSG00000034361	1.33565	4.68808e-06	7.46399e-05	Cpne2
ENSMUSG00000034438	2.03737	8.32006e-05	0.000898054	Gbp8
ENSMUSG00000034459	1.94672	4.9483e-14	4.63944e-12	Ifit1
ENSMUSG00000034574	1.06306	0.00276952	0.0161016	Daam1
ENSMUSG00000034591	-1.30874	8.63051e-06	0.000126719	Slc41a2
ENSMUSG00000034614	1.83922	6.81405e-05	0.000760681	Pik3ip1
ENSMUSG00000034634	-1.74809	2.88638e-07	6.55145e-06	Ly6d
ENSMUSG00000034641	-1.47546	3.09017e-08	8.9372e-07	Cd300ld
ENSMUSG00000034652	-1.11856	6.68653e-06	0.000101932	Cd300a
ENSMUSG00000034675	-1.66989	1.47549e-09	5.7989e-08	Dbn1
ENSMUSG00000034708	1.3281	1.58209e-06	2.91711e-05	Grn
ENSMUSG00000034730	2.77088	1.6578e-13	1.40717e-11	Adgrb1
ENSMUSG00000034751	-1.88885	1.23813e-08	3.9469e-07	Mast4
ENSMUSG00000034765	-1.6168	2.95719e-09	1.07123e-07	Dusp5
ENSMUSG00000034833	-1.01439	0.00254436	0.0150573	Tespa1
ENSMUSG00000034845	-2.01238	4.37821e-05	0.000518196	Plvap
ENSMUSG00000034883	1.63453	7.46841e-05	0.000821582	Lrr1
ENSMUSG00000034903	-1.64282	4.59203e-07	9.84644e-06	Cobll1
ENSMUSG00000034926	1.60568	6.1719e-06	9.48937e-05	Dhcr24
ENSMUSG00000034947	1.39424	8.17873e-06	0.000121655	Tmem106a
ENSMUSG00000034981	-2.70701	0.000159878	0.00154441	Parm1
ENSMUSG00000034997	3.37667	0.00013534	0.00134078	Htr2a
ENSMUSG00000035062	-1.2217	0.00680513	0.032616	Zc4h2
ENSMUSG00000035064	-1.25037	9.29835e-08	2.38079e-06	Eef2k
ENSMUSG00000035095	-2.00119	2.67326e-09	9.8328e-08	Fam167a
ENSMUSG00000035126	-1.25937	0.000139519	0.00137743	Wdr78
ENSMUSG00000035133	-1.86321	2.09452e-06	3.70937e-05	Arhgap5
ENSMUSG00000035164	-1.28801	5.6978e-10	2.48435e-08	Zc3h12c
ENSMUSG00000035208	1.11544	7.2168e-05	0.000797574	Slfn8
ENSMUSG00000035232	1.62245	2.01077e-12	1.39346e-10	Pdk3
ENSMUSG00000035239	1.09004	0.000345735	0.00296093	Neu3
ENSMUSG00000035270	-1.2597	0.000542401	0.00429164	Impg2
ENSMUSG00000035299	-2.35812	2.02663e-08	6.10757e-07	Mid1
ENSMUSG00000035352	4.70148	1.09434e-09	4.45973e-08	Ccl12
ENSMUSG00000035373	5.03362	5.36318e-16	6.93106e-14	Ccl7
ENSMUSG00000035385	1.5694	0.000392142	0.00329735	Ccl2
ENSMUSG00000035448	-4.04941	3.25266e-24	1.11094e-21	Ccr3
ENSMUSG00000035459	-2.22647	1.99624e-05	0.000264658	Stab2
ENSMUSG00000035504	1.53449	0.00426534	0.0227036	Reep6
ENSMUSG00000035576	1.87592	0.0002946	0.00258316	L3mbtl1
ENSMUSG00000035629	-1.23875	4.10466e-10	1.84581e-08	Rubcn
ENSMUSG00000035640	-1.37561	1.18729e-05	0.000167635	Cbarp
ENSMUSG00000035692	1.07644	0.000605019	0.00472198	Isg15
ENSMUSG00000035783	-1.5765	2.32416e-07	5.39984e-06	Acta2
ENSMUSG00000035790	1.15983	5.45966e-07	1.15685e-05	Cep19
ENSMUSG00000035828	-1.06411	8.57749e-06	0.000126458	Pim3
ENSMUSG00000035849	-1.36765	0.000163125	0.00156838	Krt222
ENSMUSG00000035914	-2.38341	1.27773e-05	0.00017882	Cd276
ENSMUSG00000035983	-1.18773	0.000418135	0.00347517	Gm7008
ENSMUSG00000036106	-1.20226	2.18677e-09	8.34289e-08	Prr5
ENSMUSG00000036111	1.19864	0.00187614	0.0118494	Lmo1
ENSMUSG00000036136	1.78442	0.000362834	0.00308162	Fam110c
ENSMUSG00000036172	-1.97159	0.00525028	0.0265195	Cd200r3
ENSMUSG00000036196	1.19871	0.000121352	0.00122505	Slc26a8
ENSMUSG00000036223	1.07385	0.00110915	0.00770121	Ska1
ENSMUSG00000036256	-2.24808	5.29384e-05	0.000613905	Igfbp7
ENSMUSG00000036304	-1.79219	0.00403945	0.0217189	Zdhhc23
ENSMUSG00000036352	1.19596	8.86121e-05	0.000943683	Ubac1
ENSMUSG00000036381	1.65674	1.90219e-07	4.49538e-06	P2ry14
ENSMUSG00000036427	1.03316	2.99932e-07	6.75435e-06	Gpi1
ENSMUSG00000036478	-1.01908	7.81109e-07	1.58936e-05	Btg1
ENSMUSG00000036526	-1.61128	4.54526e-12	2.91079e-10	Card11
ENSMUSG00000036528	-1.02049	2.18776e-06	3.85073e-05	Ppfibp2
ENSMUSG00000036545	1.76606	0.0012815	0.00870414	Adamts2
ENSMUSG00000036553	1.69344	2.35593e-13	1.89864e-11	Sh3tc1
ENSMUSG00000036555	-1.46334	3.38861e-11	1.87682e-09	Iqce
ENSMUSG00000036578	-3.27863	7.58911e-09	2.54955e-07	Fxyd7
ENSMUSG00000036585	-1.79873	0.000768887	0.00574164	Fgf1
ENSMUSG00000036613	1.30052	1.61294e-07	3.86271e-06	Eipr1
ENSMUSG00000036634	1.09493	0.000115764	0.00117805	Mag
ENSMUSG00000036636	1.05748	2.28425e-12	1.56036e-10	Clcn7
ENSMUSG00000036718	1.10275	0.000361867	0.00307523	Micall2
ENSMUSG00000036764	1.20609	2.90076e-05	0.000366621	Dnajc12
ENSMUSG00000036814	1.34972	0.00541454	0.0271769	Slc6a20a
ENSMUSG00000036853	-2.79711	8.12884e-09	2.71182e-07	Mcoln3
ENSMUSG00000036887	2.66797	0.00129986	0.00880385	C1qa
ENSMUSG00000036896	2.15918	0.000165751	0.00158831	C1qc
ENSMUSG00000036905	2.69759	8.97727e-07	1.78934e-05	C1qb
ENSMUSG00000036918	-1.29843	7.49134e-15	7.96024e-13	Ttc7
ENSMUSG00000036928	1.19598	0.00223747	0.0135887	Stag3
ENSMUSG00000036931	-1.03936	2.29283e-05	0.000297652	Nfkbid
ENSMUSG00000036941	1.44001	1.11499e-09	4.51824e-08	Elac1
ENSMUSG00000037014	-2.70726	0.0001682	0.00160641	Sstr4
ENSMUSG00000037031	-1.84671	4.55016e-08	1.26252e-06	Tspan15
ENSMUSG00000037095	1.48743	1.21229e-06	2.30946e-05	Lrg1
ENSMUSG00000037098	-1.28581	1.58912e-07	3.81202e-06	Rab11fip3
ENSMUSG00000037138	-1.47083	6.69382e-07	1.38962e-05	Aff3
ENSMUSG00000037185	-3.38969	2.38408e-30	1.31537e-27	Krt80
ENSMUSG00000037202	-1.91119	4.13272e-05	0.000494857	Prf1
ENSMUSG00000037217	-1.97462	2.42921e-07	5.61143e-06	Syn1
ENSMUSG00000037263	-1.31541	2.25706e-05	0.000294209	Aldh3b3
ENSMUSG00000037336	1.10077	0.00280956	0.0162907	Mfsd2b
ENSMUSG00000037341	-1.18804	0.000162326	0.00156175	Slc9a7
ENSMUSG00000037363	-1.06214	1.93584e-05	0.000257262	Letm2
ENSMUSG00000037411	1.41134	0.00260305	0.0153287	Serpine1
ENSMUSG00000037493	1.16158	2.89543e-05	0.000366269	Cib2
ENSMUSG00000037548	-1.37477	2.75885e-11	1.57047e-09	H2-DMb2
ENSMUSG00000037606	-1.26842	4.00266e-09	1.42124e-07	Osbpl5
ENSMUSG00000037628	1.1253	0.000256628	0.00231156	Cdkn3
ENSMUSG00000037692	-1.4021	2.39051e-08	7.04146e-07	Ahdc1
ENSMUSG00000037703	-1.44525	3.10492e-05	0.000388996	Lzts3
ENSMUSG00000037737	-2.39632	3.00443e-05	0.000377726	Actrt3
ENSMUSG00000037752	1.43721	1.90508e-13	1.57968e-11	Xkr8
ENSMUSG00000037754	-1.10299	0.00216402	0.0132379	Ppp1r16b
ENSMUSG00000037771	-3.41259	6.74791e-13	5.04161e-11	Slc32a1
ENSMUSG00000037816	2.00593	2.96662e-23	9.25133e-21	Fbxw17
ENSMUSG00000037820	-1.44931	8.52351e-06	0.00012607	Tgm2
ENSMUSG00000037833	-2.29202	1.16517e-05	0.000165314	Sh2d4b
ENSMUSG00000037849	1.29319	1.75771e-08	5.36474e-07	Ifi206
ENSMUSG00000037860	-1.04372	6.74614e-05	0.000755452	Aim2
ENSMUSG00000037890	1.04572	0.000525841	0.00419999	Wdr19
ENSMUSG00000037921	1.20928	0.000122428	0.00123331	Ddx60
ENSMUSG00000037922	-1.48043	6.87752e-13	5.11181e-11	Bank1
ENSMUSG00000037936	1.00684	0.000585596	0.00458286	Scarb1
ENSMUSG00000037944	-1.00334	1.75586e-06	3.19236e-05	Ccr7
ENSMUSG00000037972	-1.072	2.90236e-07	6.56693e-06	Snn
ENSMUSG00000037995	-2.34214	2.73876e-07	6.22789e-06	Igsf9
ENSMUSG00000038037	1.26019	1.26545e-06	2.39168e-05	Socs1
ENSMUSG00000038042	-1.1128	0.000159241	0.00154033	Ptpdc1
ENSMUSG00000038119	-1.67814	3.98742e-09	1.41934e-07	Cdon
ENSMUSG00000038127	-1.1555	3.8594e-07	8.49127e-06	Ccdc50
ENSMUSG00000038141	1.34491	1.56656e-07	3.77685e-06	Tmem181a
ENSMUSG00000038156	2.89013	7.77881e-15	8.20492e-13	Spon1
ENSMUSG00000038167	-1.13012	1.96251e-06	3.50152e-05	Plekhg6
ENSMUSG00000038170	-1.06032	6.27882e-08	1.6867e-06	Pde4dip
ENSMUSG00000038188	2.31493	4.30284e-08	1.19853e-06	Scarf1
ENSMUSG00000038205	-1.06674	8.01185e-05	0.000870217	Prkab2
ENSMUSG00000038214	-1.19505	5.21394e-05	0.000605129	Bend3
ENSMUSG00000038217	-1.00279	0.000110119	0.00113075	Tlcd2
ENSMUSG00000038235	3.16687	5.02604e-41	8.01095e-38	F11r
ENSMUSG00000038242	-1.63239	0.00324974	0.0182814	Aox4
ENSMUSG00000038256	-1.13441	2.17568e-05	0.000284764	Bcl9
ENSMUSG00000038264	-2.58316	9.33729e-33	6.37826e-30	Sema7a
ENSMUSG00000038351	-1.19487	1.84963e-06	3.33208e-05	Sgsm2
ENSMUSG00000038352	-1.08957	6.12258e-05	0.000696396	Arl5c
ENSMUSG00000038370	2.0174	0.00905744	0.0408582	Pcp4l1
ENSMUSG00000038418	-3.13772	7.29451e-50	2.616e-46	Egr1
ENSMUSG00000038421	-1.53924	2.25363e-08	6.70711e-07	Fcrla
ENSMUSG00000038456	1.12488	4.70828e-06	7.47954e-05	Dennd2a
ENSMUSG00000038507	1.95518	9.54509e-15	9.98659e-13	Parp12
ENSMUSG00000038508	2.32633	3.96603e-06	6.45042e-05	Gdf15
ENSMUSG00000038527	1.30855	4.25977e-08	1.18884e-06	C1rl
ENSMUSG00000038550	-1.47255	4.86121e-10	2.15895e-08	Ciart
ENSMUSG00000038587	-1.69657	6.12672e-06	9.4503e-05	Akap12
ENSMUSG00000038642	1.37049	0.000264818	0.00236981	Ctss
ENSMUSG00000038679	-1.05635	0.00433465	0.0229364	Trps1
ENSMUSG00000038729	-2.40786	9.00758e-05	0.000955017	Akap2
ENSMUSG00000038738	-1.61105	8.29679e-06	0.000123079	Shank1
ENSMUSG00000038764	2.94814	2.70943e-11	1.55467e-09	Ptpn3
ENSMUSG00000038859	-1.75426	0.000568834	0.00446874	Baiap2l1
ENSMUSG00000038963	-2.06309	2.61661e-07	5.97696e-06	Slco4a1
ENSMUSG00000039007	1.73754	4.917e-06	7.76809e-05	Cpq
ENSMUSG00000039013	-2.11424	1.75217e-22	4.92841e-20	Siglec5
ENSMUSG00000039031	-1.10048	1.18037e-07	2.93455e-06	Arhgap18
ENSMUSG00000039043	-1.86989	0.00189649	0.0119282	Arpin
ENSMUSG00000039062	1.50423	2.51931e-05	0.000322962	Anpep
ENSMUSG00000039063	-1.61477	0.00585868	0.0290301	Echdc3
ENSMUSG00000039081	-1.24926	4.45589e-05	0.000526088	Zfp503
ENSMUSG00000039109	3.13486	0.000464086	0.00378691	F13a1
ENSMUSG00000039115	1.55442	0.000443145	0.0036456	Itga9
ENSMUSG00000039137	-1.70383	2.58598e-15	3.01592e-13	Whrn
ENSMUSG00000039153	-1.51228	2.04125e-06	3.62847e-05	Runx2
ENSMUSG00000039167	-1.18336	0.00299404	0.017155	Adgrl4
ENSMUSG00000039196	1.31635	1.13011e-07	2.84912e-06	Orm1
ENSMUSG00000039316	-1.2133	5.88197e-09	2.01377e-07	Rftn1
ENSMUSG00000039395	-1.1911	8.96572e-06	0.000131372	Mreg
ENSMUSG00000039457	-3.70961	7.4432e-24	2.42665e-21	Ppl
ENSMUSG00000039470	-1.24446	0.00338255	0.0188951	Zdhhc2
ENSMUSG00000039497	1.01254	0.00814956	0.0376306	Dse
ENSMUSG00000039542	-2.25427	7.6559e-09	2.56598e-07	Ncam1
ENSMUSG00000039682	1.48553	5.90093e-05	0.000674493	Lap3
ENSMUSG00000039699	3.45788	1.47092e-11	8.70034e-10	Batf2
ENSMUSG00000039713	-1.74375	1.07201e-07	2.71697e-06	Plekhg5
ENSMUSG00000039735	-1.63662	7.95471e-06	0.000118989	Fnbp1l
ENSMUSG00000039753	1.06139	7.66002e-05	0.000840727	Fbxl5
ENSMUSG00000039760	-1.70416	0.000142999	0.00140694	Il22ra2
ENSMUSG00000039774	-1.33941	6.63967e-05	0.000745858	Galnt12
ENSMUSG00000039782	-1.10639	4.34639e-05	0.000515381	Cpeb2
ENSMUSG00000039783	-2.15771	5.10627e-17	7.25242e-15	Kmo
ENSMUSG00000039798	1.72609	0.00518825	0.0262524	2600006K01Rik
ENSMUSG00000039813	1.42252	4.36627e-06	7.01391e-05	Tbc1d2
ENSMUSG00000039899	-1.21419	8.3522e-06	0.000123773	Fgl2
ENSMUSG00000039942	-1.4147	4.19561e-14	3.98583e-12	Ptger4
ENSMUSG00000039943	1.07105	0.00605879	0.0298261	Plcb4
ENSMUSG00000039982	-1.67081	1.21256e-18	2.17427e-16	Dtx4
ENSMUSG00000039987	-1.04725	1.70901e-07	4.07238e-06	Phtf2
ENSMUSG00000040026	3.84575	3.30792e-06	5.4858e-05	Saa3
ENSMUSG00000040033	1.13838	1.74893e-05	0.000236015	Stat2
ENSMUSG00000040136	2.19153	3.29236e-05	0.000407848	Abcc8
ENSMUSG00000040152	-3.89022	4.04397e-06	6.55489e-05	Thbs1
ENSMUSG00000040209	-1.96122	2.52725e-06	4.35214e-05	Zfp704
ENSMUSG00000040253	1.33691	0.00563555	0.0281778	Gbp7
ENSMUSG00000040263	1.21429	4.22631e-07	9.15806e-06	Klhdc4
ENSMUSG00000040264	3.97419	1.55168e-13	1.33286e-11	Gbp2b
ENSMUSG00000040270	-1.19978	0.000762831	0.00571061	Bach2
ENSMUSG00000040276	-1.19652	6.5747e-07	1.36885e-05	Pacsin1
ENSMUSG00000040283	2.09735	2.77247e-08	8.08356e-07	Btnl9
ENSMUSG00000040298	2.13473	0.000737865	0.00554752	Btbd16
ENSMUSG00000040314	3.47234	3.11792e-30	1.65654e-27	Ctsg
ENSMUSG00000040328	1.3819	3.70506e-05	0.000452332	Olfr56
ENSMUSG00000040350	-1.31594	1.57141e-08	4.9004e-07	Trim7
ENSMUSG00000040363	-1.50298	2.72931e-17	4.12126e-15	Bcor
ENSMUSG00000040405	-2.88184	2.12677e-06	3.75258e-05	Havcr1
ENSMUSG00000040466	1.16526	0.00020536	0.00190549	Blvrb
ENSMUSG00000040483	1.93659	5.25153e-14	4.89177e-12	Xaf1
ENSMUSG00000040488	-3.15427	8.57902e-09	2.84875e-07	Ltbp4
ENSMUSG00000040552	1.25768	0.00910795	0.0410215	C3ar1
ENSMUSG00000040557	1.01489	0.00572652	0.0285431	Mettl27
ENSMUSG00000040584	-1.84286	2.90196e-09	1.05657e-07	Abcb1a
ENSMUSG00000040592	-1.15225	0.00204691	0.0126674	Cd79b
ENSMUSG00000040616	1.52596	0.00478691	0.0247186	Tmem51
ENSMUSG00000040627	-2.90519	6.51936e-10	2.82538e-08	Aicda
ENSMUSG00000040703	4.00211	2.18585e-12	1.50029e-10	Cyp2s1
ENSMUSG00000040710	-1.51893	2.73497e-12	1.83333e-10	St8sia4
ENSMUSG00000040711	1.25038	9.78492e-05	0.00102381	Sh3pxd2b
ENSMUSG00000040721	-1.33192	0.000145227	0.00142398	Zfhx2
ENSMUSG00000040734	-1.49217	0.000109249	0.00112503	Ppp1r13l
ENSMUSG00000040809	1.17711	6.71531e-06	0.000102262	Chil3
ENSMUSG00000040820	-1.02846	1.55868e-07	3.76419e-06	Hlcs
ENSMUSG00000040860	-1.18304	1.55684e-06	2.88539e-05	Crocc
ENSMUSG00000040883	1.08476	0.000646205	0.0049999	Tmem205
ENSMUSG00000040899	-2.43628	1.35023e-09	5.33583e-08	Ccr6
ENSMUSG00000040935	-2.3947	0.000236314	0.00215233	Padi6
ENSMUSG00000040978	1.95407	1.32858e-11	7.90807e-10	Gm11992
ENSMUSG00000040998	-2.92096	1.16874e-05	0.000165504	Npnt
ENSMUSG00000041073	-1.96275	4.35812e-16	5.68338e-14	Nacad
ENSMUSG00000041120	-1.59459	0.0104367	0.0454783	Nbl1
ENSMUSG00000041189	-1.34906	4.54862e-07	9.79729e-06	Chrnb1
ENSMUSG00000041202	-1.85855	5.11523e-08	1.40571e-06	Pla2g2d
ENSMUSG00000041237	2.19587	8.11602e-05	0.000880002	Pklr
ENSMUSG00000041329	2.31794	9.60099e-06	0.000139682	Atp1b2
ENSMUSG00000041351	-2.62458	5.76769e-15	6.34294e-13	Rap1gap
ENSMUSG00000041361	-1.97919	2.59512e-07	5.93732e-06	Myzap
ENSMUSG00000041420	-1.07864	0.00195989	0.0122291	Meis3
ENSMUSG00000041431	1.28771	1.02181e-05	0.000148059	Ccnb1
ENSMUSG00000041460	-1.55415	0.000391417	0.00329319	Cacna2d4
ENSMUSG00000041481	1.32369	0.000267613	0.00238738	Serpina3g
ENSMUSG00000041538	-1.23809	6.91971e-11	3.59649e-09	H2-Ob
ENSMUSG00000041607	-1.25598	1.17091e-08	3.76609e-07	Mbp
ENSMUSG00000041617	1.16219	0.0102831	0.044918	Ccdc74a
ENSMUSG00000041729	-1.59335	2.26633e-05	0.000295014	Coro2b
ENSMUSG00000041736	1.91519	3.36279e-12	2.19269e-10	Tspo
ENSMUSG00000041939	1.35576	5.67845e-09	1.95341e-07	Mvk
ENSMUSG00000041995	-1.43326	1.61637e-08	4.99718e-07	Zbed3
ENSMUSG00000042073	-1.18826	0.000293492	0.00257659	Abhd14b
ENSMUSG00000042097	-1.23337	0.000355435	0.00302594	Zfp239
ENSMUSG00000042105	-1.37691	5.78265e-10	2.5137e-08	Inpp5f
ENSMUSG00000042190	1.9885	1.39127e-12	9.88007e-11	Cmklr1
ENSMUSG00000042195	-1.24455	0.00265467	0.0155752	Slc35f2
ENSMUSG00000042215	1.50823	8.64377e-05	0.0009288	Bag2
ENSMUSG00000042250	-1.91237	1.06307e-08	3.45018e-07	Pglyrp4
ENSMUSG00000042269	-1.61065	0.000292523	0.00256965	Fam92b
ENSMUSG00000042272	1.34239	0.0015766	0.0103035	Sestd1
ENSMUSG00000042284	-2.16613	0.00176701	0.0113261	Itga1
ENSMUSG00000042429	-1.51308	0.00244459	0.0145845	Adora1
ENSMUSG00000042439	-2.59121	4.63497e-07	9.92367e-06	Zfp532
ENSMUSG00000042474	-1.2483	5.25912e-07	1.11766e-05	Fcmr
ENSMUSG00000042476	1.74079	2.52864e-08	7.41787e-07	Abcb4
ENSMUSG00000042514	-1.88374	5.51467e-08	1.49826e-06	Klhl14
ENSMUSG00000042541	1.09587	0.0005229	0.00418116	Sem1
ENSMUSG00000042581	2.38114	0.00116785	0.00802341	Thsd7b
ENSMUSG00000042616	-1.67084	1.10853e-11	6.73807e-10	Oscp1
ENSMUSG00000042638	-1.1128	0.00771443	0.0359999	Gucy2c
ENSMUSG00000042644	-1.37874	2.29026e-08	6.78797e-07	Itpr3
ENSMUSG00000042726	1.19113	1.28538e-10	6.33635e-09	Trafd1
ENSMUSG00000042757	-1.06157	0.000130444	0.00130126	Tmem108
ENSMUSG00000042766	-1.45459	0.00131458	0.00889092	Trim46
ENSMUSG00000042770	1.20925	0.00161904	0.0105377	Hebp1
ENSMUSG00000042807	-1.90707	2.91946e-06	4.93283e-05	Hecw2
ENSMUSG00000042821	1.02211	0.000765823	0.0057277	Snai1
ENSMUSG00000042828	-1.99733	5.008e-05	0.000584063	Trim72
ENSMUSG00000042918	-1.83557	0.00805877	0.0373033	Mamstr
ENSMUSG00000043008	1.59936	2.97264e-17	4.44192e-15	Klhl6
ENSMUSG00000043036	1.7406	5.69594e-13	4.32319e-11	Ccdc63
ENSMUSG00000043061	1.20941	2.01321e-13	1.65974e-11	Tmem18
ENSMUSG00000043079	-1.47671	0.00182333	0.0116196	Synpo
ENSMUSG00000043099	-1.95155	1.45534e-10	7.12518e-09	Hic1
ENSMUSG00000043168	-1.69335	7.42942e-09	2.50176e-07	4930426D05Rik
ENSMUSG00000043192	1.36487	0.00010613	0.00110002	Gm1840
ENSMUSG00000043243	-1.57991	9.2788e-09	3.06646e-07	Fam129c
ENSMUSG00000043286	1.47738	0.000344002	0.00294962	Pnpla1
ENSMUSG00000043391	-1.38502	0.00498887	0.0255135	2510009E07Rik
ENSMUSG00000043468	-2.38055	6.43078e-08	1.72107e-06	Adam30
ENSMUSG00000043541	-1.46758	0.000148206	0.00144725	Casc1
ENSMUSG00000043773	-2.4599	2.15881e-10	1.01869e-08	1700048O20Rik
ENSMUSG00000043822	1.80742	0.00162552	0.0105751	Adamtsl5
ENSMUSG00000043932	-1.67533	0.000477917	0.00387047	Klri2
ENSMUSG00000043953	-1.06446	0.000172901	0.00164147	Ccrl2
ENSMUSG00000044033	3.4142	2.85306e-06	4.83772e-05	Ccdc141
ENSMUSG00000044080	1.17849	0.000125957	0.00126442	S100a1
ENSMUSG00000044092	-1.36001	4.43445e-11	2.40046e-09	C130050O18Rik
ENSMUSG00000044156	-1.30975	0.000692373	0.00527742	Hepacam2
ENSMUSG00000044167	-1.30363	6.38933e-06	9.78175e-05	Foxo1
ENSMUSG00000044199	1.05187	9.31074e-08	2.38079e-06	S1pr4
ENSMUSG00000044201	1.46398	9.87868e-07	1.94389e-05	Cdc25c
ENSMUSG00000044317	-2.7969	0.000161113	0.00155425	Gpr4
ENSMUSG00000044337	-2.81402	1.03807e-21	2.70747e-19	Ackr3
ENSMUSG00000044453	-1.00291	0.00113246	0.00783273	Ffar1
ENSMUSG00000044534	-2.96794	1.03704e-24	3.81445e-22	Ackr2
ENSMUSG00000044562	-2.08821	1.70656e-11	9.9921e-10	Rasip1
ENSMUSG00000044583	1.25608	2.70987e-06	4.61676e-05	Tlr7
ENSMUSG00000044678	-1.42026	0.0039522	0.0214021	Ly6k
ENSMUSG00000044694	-1.27332	0.00685666	0.0327927	2010007H06Rik
ENSMUSG00000044701	1.01675	0.00949613	0.0422975	Il27
ENSMUSG00000044707	3.14681	2.03427e-06	3.62055e-05	Ccnjl
ENSMUSG00000044712	1.06154	5.60706e-06	8.74275e-05	Slc38a6
ENSMUSG00000044734	1.07126	2.19301e-07	5.12358e-06	Serpinb1a
ENSMUSG00000044786	-1.21916	1.66787e-08	5.12326e-07	Zfp36
ENSMUSG00000045007	-1.91757	0.000164197	0.00157658	Tubg2
ENSMUSG00000045031	1.95787	0.00657651	0.031729	Cetn4
ENSMUSG00000045065	-2.39545	0.000108447	0.00111839	9930022D16Rik
ENSMUSG00000045087	-3.87945	9.32853e-12	5.768e-10	S1pr5
ENSMUSG00000045092	-1.43472	1.18397e-11	7.13614e-10	S1pr1
ENSMUSG00000045136	-1.64364	2.8925e-07	6.55496e-06	Tubb2b
ENSMUSG00000045273	1.08538	0.00430803	0.0228714	Cenph
ENSMUSG00000045287	-1.54428	0.00186305	0.0118098	Rtn4rl1
ENSMUSG00000045377	-1.60297	0.000134284	0.00133308	Tmem88
ENSMUSG00000045502	-1.35803	3.9153e-08	1.10561e-06	Hcar2
ENSMUSG00000045538	1.31904	1.39308e-06	2.61225e-05	Ddx28
ENSMUSG00000045551	1.64384	1.74814e-14	1.71761e-12	Fpr1
ENSMUSG00000045629	1.54589	0.00398858	0.0215423	Sh3tc2
ENSMUSG00000045659	-1.09784	0.00468372	0.0242731	Plekha7
ENSMUSG00000045672	-1.04239	0.0100276	0.044057	Col27a1
ENSMUSG00000045763	-1.06926	0.00020661	0.00191461	Basp1
ENSMUSG00000045777	1.63348	4.92334e-09	1.71006e-07	Ifitm10
ENSMUSG00000045932	2.38162	1.07098e-10	5.35301e-09	Ifit2
ENSMUSG00000045968	1.11091	0.0106265	0.0461613	Teddm2
ENSMUSG00000046031	2.25876	1.44112e-05	0.000198008	Fam26f
ENSMUSG00000046169	-1.53143	3.01289e-05	0.000378127	Adamts6
ENSMUSG00000046321	-1.86997	0.000860114	0.00632087	Hs3st2
ENSMUSG00000046329	-1.30097	0.00113455	0.00784344	Slc25a23
ENSMUSG00000046352	-2.27096	2.90921e-05	0.000367042	Gjb2
ENSMUSG00000046410	1.32202	5.65115e-20	1.23717e-17	Kcnk6
ENSMUSG00000046456	1.2021	0.000530025	0.00422635	Tmem150b
ENSMUSG00000046463	-1.87542	6.69372e-05	0.000750753	5930403N24Rik
ENSMUSG00000046652	-3.28147	0.000383346	0.00323857	Tas2r143
ENSMUSG00000046718	1.37339	0.000194659	0.00181915	Bst2
ENSMUSG00000046727	-1.14885	0.000637143	0.00494579	Cystm1
ENSMUSG00000046794	1.13068	4.44823e-06	7.12163e-05	Ppp1r3b
ENSMUSG00000046798	1.0936	0.00620541	0.0303147	Cldn12
ENSMUSG00000046807	3.02803	1.0054e-14	1.03018e-12	Lrrc75b
ENSMUSG00000046961	-3.73691	9.11917e-10	3.8362e-08	Gpr156
ENSMUSG00000047037	1.61995	0.000118239	0.00119954	Nipa1
ENSMUSG00000047094	-1.63134	0.011213	0.0480185	Ofcc1
ENSMUSG00000047146	-2.06451	3.84362e-06	6.26553e-05	Tet1
ENSMUSG00000047180	-1.1511	7.30719e-08	1.92687e-06	Neurl3
ENSMUSG00000047181	1.97452	2.25298e-05	0.000294077	Samd14
ENSMUSG00000047221	-1.01399	0.000901924	0.00656423	Fam185a
ENSMUSG00000047246	-1.56184	1.8377e-09	7.08651e-08	Hist1h2be
ENSMUSG00000047293	4.01908	9.42458e-30	4.82842e-27	Gpr15
ENSMUSG00000047443	3.78754	1.01079e-11	6.22308e-10	Erfe
ENSMUSG00000047583	1.70189	6.62934e-09	2.24818e-07	Tyw3
ENSMUSG00000047592	2.36052	1.23836e-06	2.3489e-05	Nxpe5
ENSMUSG00000047671	-1.32241	0.000157319	0.00152379	Tctex1d4
ENSMUSG00000047844	3.38718	2.80574e-09	1.02413e-07	Bex4
ENSMUSG00000047880	-1.15467	9.8023e-08	2.49758e-06	Cxcr5
ENSMUSG00000048001	-1.51113	0.00489595	0.0251639	Hes5
ENSMUSG00000048031	-1.32332	4.32998e-05	0.000514611	Fcrl5
ENSMUSG00000048058	-1.21382	8.66693e-05	0.000930327	Ldlrad3
ENSMUSG00000048078	-1.54409	5.34419e-05	0.000618744	Tenm4
ENSMUSG00000048142	-1.4116	1.55719e-08	4.86664e-07	Nat8l
ENSMUSG00000048218	-1.08296	0.000300462	0.00261854	Amigo2
ENSMUSG00000048285	-1.27255	0.000340926	0.00293552	Frmd6
ENSMUSG00000048329	1.0972	4.15752e-05	0.000497412	Mfsd6l
ENSMUSG00000048473	2.48808	2.32403e-07	5.39984e-06	Sult6b2
ENSMUSG00000048480	-1.65348	8.98101e-07	1.78934e-05	Cxcr1
ENSMUSG00000048534	-2.12666	1.82636e-13	1.52321e-11	Jaml
ENSMUSG00000048772	1.08965	0.00341553	0.0190583	Tmem53
ENSMUSG00000048779	1.11887	0.00534972	0.0268703	P2ry6
ENSMUSG00000048794	-2.25629	1.85205e-05	0.000247832	Cfap100
ENSMUSG00000048806	2.80878	1.06333e-10	5.33339e-09	Ifnb1
ENSMUSG00000048807	-1.29866	0.000550597	0.00434929	Slc35e4
ENSMUSG00000048824	-1.109	0.000506731	0.00408374	Gm568
ENSMUSG00000048827	-1.119	0.000518628	0.00416141	Pkd1l3
ENSMUSG00000048852	1.15001	0.00392803	0.0213196	Gm12185
ENSMUSG00000049037	1.29496	0.00195361	0.0122016	Clec4a1
ENSMUSG00000049044	-1.59806	2.43575e-06	4.21991e-05	Rapgef4
ENSMUSG00000049086	-1.41607	0.00266289	0.0156106	Bmyc
ENSMUSG00000049115	1.11252	0.0114931	0.0488498	Agtr1a
ENSMUSG00000049350	-2.04615	0.0062446	0.030469	Zg16
ENSMUSG00000049357	1.68971	4.57704e-06	7.31155e-05	4933408B17Rik
ENSMUSG00000049488	1.52568	6.85777e-08	1.82513e-06	Tmem67
ENSMUSG00000049491	-2.1516	1.23575e-08	3.9469e-07	Slc36a3
ENSMUSG00000049649	-2.0811	2.3158e-06	4.03157e-05	Gpr3
ENSMUSG00000049653	-1.57851	1.7207e-10	8.31092e-09	Spatc1
ENSMUSG00000049687	1.25405	0.00106105	0.00743931	Fam109b
ENSMUSG00000049709	-1.62512	0.000386795	0.00326334	Nlrp10
ENSMUSG00000049866	-2.02309	1.66074e-14	1.64299e-12	Arl4c
ENSMUSG00000049871	-1.11167	0.000863371	0.00633507	Nlrc3
ENSMUSG00000049892	-1.38172	1.86126e-07	4.41319e-06	Rasd1
ENSMUSG00000049897	1.24672	0.0106504	0.0462268	Stkld1
ENSMUSG00000050022	-2.77331	8.51528e-13	6.26419e-11	Amz1
ENSMUSG00000050241	-1.8995	2.15096e-05	0.000281786	Klre1
ENSMUSG00000050271	-1.85244	3.35589e-10	1.52343e-08	Prag1
ENSMUSG00000050335	1.32204	1.30621e-07	3.21952e-06	Lgals3
ENSMUSG00000050357	-1.13728	2.06189e-08	6.1749e-07	Carmil2
ENSMUSG00000050379	-1.05331	2.44909e-06	4.2379e-05	2021-09-06
ENSMUSG00000050549	1.38238	5.65657e-08	1.52813e-06	Fam241a
ENSMUSG00000050556	-1.225	0.000767537	0.00573753	Kcnb1
ENSMUSG00000050600	-1.05722	0.0034766	0.0193302	Zfp831
ENSMUSG00000050777	1.77315	0.00555263	0.0278408	Tmem37
ENSMUSG00000050822	-1.03241	0.000174125	0.0016509	Slc29a4
ENSMUSG00000050947	-1.25154	0.00373092	0.0204197	Amigo1
ENSMUSG00000050965	-1.66206	1.12424e-06	2.16473e-05	Prkca
ENSMUSG00000050982	2.43417	3.66561e-06	6.04186e-05	Apol10a
ENSMUSG00000051022	-1.01592	0.00412569	0.0220997	Hs3st1
ENSMUSG00000051043	-2.22501	4.05299e-06	6.56209e-05	Gprc5c
ENSMUSG00000051065	3.17312	3.88947e-05	0.000470046	Mb21d2
ENSMUSG00000051079	-7.568	9.7865e-10	4.04628e-08	Rgs13
ENSMUSG00000051098	-1.17812	0.000110102	0.00113075	Mblac2
ENSMUSG00000051107	-1.7934	2.04479e-08	6.14939e-07	NA
ENSMUSG00000051147	1.33674	3.00763e-05	0.000377798	Nat2
ENSMUSG00000051177	-1.79172	0.00501425	0.0256159	Plcb1
ENSMUSG00000051185	1.06371	0.000204488	0.00189986	Fam174a
ENSMUSG00000051212	-1.41196	7.64161e-07	1.56152e-05	Gpr183
ENSMUSG00000051331	3.98337	4.61716e-06	7.36743e-05	Cacna1c
ENSMUSG00000051335	-1.06479	0.00163216	0.0106039	Gfod1
ENSMUSG00000051339	-1.97755	0.000175592	0.00166262	2900026A02Rik
ENSMUSG00000051344	-1.69614	5.55229e-12	3.53989e-10	Plekhm3
ENSMUSG00000051439	1.02823	0.000207483	0.00192147	Cd14
ENSMUSG00000051502	1.05069	0.00185122	0.0117588	Ufsp1
ENSMUSG00000051504	-3.36653	2.32632e-07	5.39984e-06	Siglech
ENSMUSG00000051579	1.54856	8.2439e-05	0.000891341	Tceal8
ENSMUSG00000051652	-1.72693	0.000292211	0.00256848	Lrrc3
ENSMUSG00000051748	1.61282	1.03497e-06	2.02084e-05	Wfdc21
ENSMUSG00000051811	2.57053	3.52666e-13	2.76447e-11	Cox6b2
ENSMUSG00000051832	-1.15405	0.00801081	0.0371328	E230016K23Rik
ENSMUSG00000052062	-1.37668	0.011659	0.0493942	Pard3b
ENSMUSG00000052212	1.13711	0.000400718	0.00335645	Cd177
ENSMUSG00000052234	-2.98289	3.64595e-11	2.01158e-09	Epx
ENSMUSG00000052270	1.38627	8.03012e-09	2.68513e-07	Fpr2
ENSMUSG00000052336	-2.71214	9.81976e-11	4.94261e-09	Cx3cr1
ENSMUSG00000052396	-1.39774	0.000160264	0.0015471	Mogat2
ENSMUSG00000052512	1.00671	0.0113168	0.0482777	Nav2
ENSMUSG00000052616	-2.02253	3.48284e-12	2.26069e-10	Terb1
ENSMUSG00000052736	-2.30403	7.81407e-05	0.000854934	Klrc2
ENSMUSG00000052769	-1.59422	0.000561311	0.0044169	Gm9889
ENSMUSG00000052776	1.41663	2.04199e-07	4.80201e-06	Oas1a
ENSMUSG00000052837	-1.28169	5.99113e-07	1.25831e-05	Junb
ENSMUSG00000053080	-2.00634	7.12591e-07	1.47081e-05	2700081O15Rik
ENSMUSG00000053101	1.72098	7.35373e-12	4.60652e-10	Gpr141
ENSMUSG00000053263	1.33018	0.00440343	0.0231806	Gm12592
ENSMUSG00000053310	-2.10311	5.70858e-05	0.000655117	Nrgn
ENSMUSG00000053318	1.62344	0.000186714	0.00175205	Slamf8
ENSMUSG00000053338	1.74568	6.00794e-14	5.48942e-12	Tarm1
ENSMUSG00000053358	2.39058	1.49546e-07	3.62985e-06	Gm9905
ENSMUSG00000053395	-1.82007	0.00113161	0.00783273	Cacng8
ENSMUSG00000053414	-4.4783	3.66984e-06	6.04186e-05	Hunk
ENSMUSG00000053477	-1.39597	3.17951e-13	2.53389e-11	Tcf4
ENSMUSG00000053553	-1.46621	1.40365e-06	2.62864e-05	3110082I17Rik
ENSMUSG00000053574	-1.35831	0.0109529	0.0472396	4930563E22Rik
ENSMUSG00000053581	-1.15105	0.00148993	0.00985791	Zfand2a
ENSMUSG00000053617	-1.83574	6.44311e-15	7.00201e-13	Sh3pxd2a
ENSMUSG00000053647	-3.02427	8.26646e-07	1.66315e-05	Gper1
ENSMUSG00000053687	1.70718	0.000109095	0.00112426	Dpep2
ENSMUSG00000053702	-2.65997	2.3956e-19	4.58198e-17	Nebl
ENSMUSG00000053846	3.99461	1.53713e-33	1.16053e-30	Lipg
ENSMUSG00000053889	-3.387	2.10486e-06	3.71901e-05	Kirrel3os
ENSMUSG00000053897	1.07506	0.0043415	0.0229473	Slc39a8
ENSMUSG00000054027	-1.06679	7.98678e-06	0.00011922	Nt5dc3
ENSMUSG00000054072	3.15113	7.23526e-15	7.7455e-13	Iigp1
ENSMUSG00000054169	1.04219	0.00109405	0.00762591	Ceacam10
ENSMUSG00000054191	1.63993	0.00146077	0.00970576	Klf1
ENSMUSG00000054342	1.02748	0.00217581	0.0132874	Kcnn4
ENSMUSG00000054385	-1.67308	2.48307e-05	0.000318886	Ceacam2
ENSMUSG00000054428	1.14667	0.000300378	0.00261854	Atpif1
ENSMUSG00000054582	1.00469	0.00055843	0.00440378	Pabpc1l
ENSMUSG00000054676	1.2239	1.27629e-12	9.15417e-11	1600014C10Rik
ENSMUSG00000054793	-1.54893	0.00285532	0.0164695	Cadm4
ENSMUSG00000054855	1.23836	9.22599e-08	2.37181e-06	Rnd1
ENSMUSG00000054893	-1.4476	0.000329899	0.0028457	Zfp667
ENSMUSG00000054905	6.67713	6.78106e-79	9.72743e-75	Stfa3
ENSMUSG00000055116	-1.05384	4.17877e-07	9.11025e-06	Arntl
ENSMUSG00000055170	-1.00067	0.00144718	0.00963329	Ifng
ENSMUSG00000055210	-2.90601	8.339e-08	2.16708e-06	Foxd2
ENSMUSG00000055216	-1.04863	0.00331403	0.0185775	9430025C20Rik
ENSMUSG00000055235	-1.44035	0.00681915	0.0326613	Wdr86
ENSMUSG00000055435	1.11483	0.000572633	0.00449366	Maf
ENSMUSG00000055538	-1.23803	2.41267e-05	0.00031096	Zcchc24
ENSMUSG00000055546	-1.43191	0.008677	0.0394647	Timd4
ENSMUSG00000055629	1.40612	0.000698537	0.00531519	B4galnt4
ENSMUSG00000055717	-1.21449	3.02072e-11	1.6993e-09	Slain1
ENSMUSG00000055723	-1.43551	3.94057e-05	0.000474622	Rras2
ENSMUSG00000055745	-1.18158	1.77838e-06	3.21296e-05	Rtl6
ENSMUSG00000055978	-2.8348	7.12733e-08	1.88986e-06	Fut2
ENSMUSG00000056025	1.58757	1.77358e-05	0.000238667	Clca3a1
ENSMUSG00000056054	1.26542	1.75808e-06	3.19236e-05	S100a8
ENSMUSG00000056121	1.18836	4.69982e-07	1.00475e-05	Fez2
ENSMUSG00000056145	-1.31575	1.5548e-05	0.00021181	AI504432
ENSMUSG00000056203	-3.72617	8.10266e-10	3.43884e-08	Tas2r135
ENSMUSG00000056427	-3.0185	1.44489e-05	0.000198155	Slit3
ENSMUSG00000056596	7.17052	2.20874e-15	2.59708e-13	Trnp1
ENSMUSG00000056629	1.18817	0.00301134	0.0172308	Fkbp2
ENSMUSG00000056666	-1.2142	3.26831e-10	1.48838e-08	Retsat
ENSMUSG00000056671	1.52329	0.00191356	0.0120079	Prelid2
ENSMUSG00000056708	-1.35	1.36771e-07	3.35955e-06	Ier5
ENSMUSG00000056735	-1.69794	0.000179969	0.001694	A930024E05Rik
ENSMUSG00000056899	-1.07583	0.00783737	0.0364313	Immp2l
ENSMUSG00000056973	-6.21597	2.18169e-13	1.7782e-11	Ces1d
ENSMUSG00000057098	-1.41226	7.06646e-09	2.38514e-07	Ebf1
ENSMUSG00000057123	1.08647	0.00882766	0.0400472	Gja5
ENSMUSG00000057337	-1.25226	3.11216e-06	5.20784e-05	Chst3
ENSMUSG00000057359	1.29689	0.000179001	0.001686	Gm17494
ENSMUSG00000057530	-1.12009	3.56989e-05	0.000436946	Ece1
ENSMUSG00000057606	-1.32309	0.000719802	0.00544475	Colq
ENSMUSG00000057729	2.78813	4.53401e-20	1.01626e-17	Prtn3
ENSMUSG00000057914	-2.22207	0.00517403	0.0261989	Cacnb2
ENSMUSG00000057969	-2.42107	0.000462949	0.0037819	Sema3b
ENSMUSG00000058013	-1.31609	6.57277e-07	1.36885e-05	2021-09-11
ENSMUSG00000058056	1.11544	0.00287241	0.0165481	Palld
ENSMUSG00000058163	2.11643	2.20742e-06	3.88056e-05	Gm5431
ENSMUSG00000058183	1.95492	7.00837e-05	0.000779342	Mmel1
ENSMUSG00000058252	3.91778	2.87438e-27	1.24949e-24	Tcp11x2
ENSMUSG00000058258	1.3454	7.99214e-05	0.000869198	Idi1
ENSMUSG00000058317	-1.62559	9.27518e-05	0.000977608	Ube2e2
ENSMUSG00000058396	-2.40327	2.41882e-09	9.05951e-08	Gpr182
ENSMUSG00000058728	-2.7033	0.000127978	0.00128022	Cd300c
ENSMUSG00000058761	1.14881	1.30589e-05	0.000181902	Rnf169
ENSMUSG00000058869	-2.45166	2.94795e-05	0.000371602	Gm4832
ENSMUSG00000059089	1.37144	2.07332e-09	7.95234e-08	Fcgr4
ENSMUSG00000059108	2.10616	1.66172e-18	2.907e-16	Ifitm6
ENSMUSG00000059325	1.97489	8.74062e-23	2.64275e-20	Hopx
ENSMUSG00000059639	-1.70764	0.00182566	0.0116241	Clec4a4
ENSMUSG00000059657	2.63399	3.28576e-12	2.15225e-10	Stfa2l1
ENSMUSG00000059708	-1.11813	0.00172721	0.0111168	Akap17b
ENSMUSG00000059743	2.29389	1.46147e-13	1.27059e-11	Fdps
ENSMUSG00000059900	1.38257	1.68221e-06	3.0819e-05	Tmem40
ENSMUSG00000059901	-1.13188	0.00263263	0.0154712	Adamts14
ENSMUSG00000060063	1.98601	1.28507e-11	7.68096e-10	Alox5ap
ENSMUSG00000060131	1.03041	0.00194323	0.0121622	Atp8b4
ENSMUSG00000060183	-1.54695	0.00133921	0.00903622	Cxcl11
ENSMUSG00000060429	-2.5216	1.01065e-06	1.98058e-05	Sntb1
ENSMUSG00000060445	-1.43281	1.70484e-06	3.11939e-05	Sycp2
ENSMUSG00000060703	1.71265	0.00051869	0.00416141	Cd302
ENSMUSG00000061068	-5.47724	7.21606e-11	3.73309e-09	Mcpt4
ENSMUSG00000061086	-1.76308	1.75757e-06	3.19236e-05	Myl4
ENSMUSG00000061132	-1.13423	8.70799e-07	1.74221e-05	Blnk
ENSMUSG00000061143	-1.11974	8.96916e-05	0.000952351	Maml3
ENSMUSG00000061353	-2.91846	8.12199e-07	1.63868e-05	Cxcl12
ENSMUSG00000061410	-1.23515	0.00106005	0.00743587	Zcchc14
ENSMUSG00000061411	-1.04249	0.0044854	0.0235033	Nol4l
ENSMUSG00000061666	1.80935	2.29646e-05	0.000297855	Gdpd1
ENSMUSG00000061723	-2.1722	1.06498e-15	1.3009e-13	Tnnt3
ENSMUSG00000061859	-1.00319	2.09318e-05	0.000274969	Patj
ENSMUSG00000061878	2.35493	7.90212e-05	0.000862606	Sphk1
ENSMUSG00000061894	-1.04809	6.29891e-05	0.000713164	Zscan20
ENSMUSG00000061981	1.56494	1.05359e-13	9.44611e-12	Flot2
ENSMUSG00000062082	1.00771	0.00162786	0.0105809	Cd200r4
ENSMUSG00000062115	-1.1216	7.63023e-05	0.000838098	Rai1
ENSMUSG00000062116	1.01991	3.7162e-08	1.05772e-06	Zfp954
ENSMUSG00000062127	2.1182	5.87609e-14	5.40337e-12	Cttnbp2nl
ENSMUSG00000062148	-2.01744	1.08377e-08	3.50151e-07	Ear6
ENSMUSG00000062300	2.61293	1.24098e-06	2.3489e-05	Nectin2
ENSMUSG00000062345	-2.69613	1.59402e-06	2.93533e-05	Serpinb2
ENSMUSG00000062380	3.38461	4.32885e-15	4.92836e-13	Tubb3
ENSMUSG00000062488	1.63183	4.5262e-08	1.2583e-06	Ifit3b
ENSMUSG00000062524	-2.38881	4.88763e-05	0.000572352	Ncr1
ENSMUSG00000062545	1.44569	0.00342147	0.0190828	Tlr12
ENSMUSG00000062727	1.23014	0.00821529	0.0378204	Hist1h2bk
ENSMUSG00000062960	-1.87123	7.45475e-05	0.000820709	Kdr
ENSMUSG00000062980	3.29099	1.02478e-09	4.21218e-08	Cped1
ENSMUSG00000063232	-3.38372	8.40008e-07	1.68295e-05	Serpina11
ENSMUSG00000063234	1.21712	0.000149843	0.00145879	Gpr84
ENSMUSG00000063268	1.12083	7.83722e-07	1.59113e-05	Parp10
ENSMUSG00000063354	-1.4293	3.25226e-07	7.27827e-06	Slc39a4
ENSMUSG00000063388	2.92361	0.00360487	0.0198824	BC023105
ENSMUSG00000063458	3.46259	2.55886e-12	1.72333e-10	Lrmda
ENSMUSG00000063522	-1.69294	0.000124385	0.00125126	2010109I03Rik
ENSMUSG00000063535	1.79755	3.74665e-07	8.26857e-06	Zfp773
ENSMUSG00000063558	2.9859	3.72946e-06	6.1072e-05	Aox1
ENSMUSG00000063611	2.15527	0.0019646	0.0122531	Gm10134
ENSMUSG00000063646	-1.12118	2.40819e-09	9.04331e-08	Jakmip1
ENSMUSG00000063760	2.29651	0.000240986	0.00218933	Rnf217
ENSMUSG00000063873	1.75648	0.000864293	0.00633859	Slc24a3
ENSMUSG00000064280	-3.07015	1.07823e-13	9.60699e-12	Ccdc146
ENSMUSG00000064294	4.63077	4.13422e-08	1.15605e-06	Aox3
ENSMUSG00000064341	-1.32158	2.54821e-07	5.85802e-06	mt-Nd1
ENSMUSG00000064345	-1.78462	7.18497e-12	4.54046e-10	mt-Nd2
ENSMUSG00000064360	3.55595	1.44832e-08	4.55616e-07	mt-Nd3
ENSMUSG00000064363	-1.69341	3.06407e-11	1.71695e-09	mt-Nd4
ENSMUSG00000064367	-1.26071	0.000601031	0.00469341	mt-Nd5
ENSMUSG00000064368	-1.05046	8.68832e-05	0.000931495	mt-Nd6
ENSMUSG00000064370	-1.5301	2.72877e-11	1.55953e-09	mt-Cytb
ENSMUSG00000064901	-1.3099	0.000722189	0.00544963	Snora21
ENSMUSG00000064936	-1.86977	0.00360613	0.0198824	Gm23722
ENSMUSG00000065444	-1.46132	1.08695e-05	0.000155302	Mir27a
ENSMUSG00000065541	-1.29299	0.00212205	0.0130256	Mir24-2
ENSMUSG00000065611	-1.54107	1.77742e-05	0.000238961	Mir23a
ENSMUSG00000066026	-1.38078	3.28895e-05	0.000407848	Dhrs3
ENSMUSG00000066150	1.96715	5.6921e-20	1.23717e-17	Slc31a1
ENSMUSG00000066152	1.54179	1.11269e-12	8.10233e-11	Slc31a2
ENSMUSG00000066357	-1.36717	4.92665e-10	2.18126e-08	Wdr6
ENSMUSG00000066363	1.77497	9.33429e-07	1.85201e-05	Serpina3f
ENSMUSG00000066456	-1.42902	0.0018187	0.0116055	Hmgn3
ENSMUSG00000066677	4.33242	7.44278e-37	8.46915e-34	Pydc3
ENSMUSG00000066838	1.10231	0.00035328	0.00301117	Zfp772
ENSMUSG00000066861	1.72854	6.56009e-07	1.36885e-05	Oas1g
ENSMUSG00000066894	-2.38123	2.60207e-22	7.17821e-20	Vsig10
ENSMUSG00000066975	1.11615	0.00656636	0.0316939	Cryba4
ENSMUSG00000067235	-1.82647	1.0507e-12	7.68996e-11	H2-Q10
ENSMUSG00000067341	-1.0822	8.62593e-06	0.000126719	H2-Eb2
ENSMUSG00000067586	-3.97323	2.19263e-19	4.25045e-17	S1pr3
ENSMUSG00000067610	-1.19181	0.00632069	0.0306941	Klri1
ENSMUSG00000067916	1.25288	1.28387e-06	2.41694e-05	Zfp991
ENSMUSG00000068245	1.32538	0.00431412	0.0228827	Phf11d
ENSMUSG00000068246	3.79653	1.44189e-13	1.26122e-11	Apol9b
ENSMUSG00000068407	-1.69335	0.00923826	0.041378	Rnase12
ENSMUSG00000068417	1.37162	0.000204815	0.00190166	Pnp2
ENSMUSG00000068566	-1.01496	0.000922387	0.00667254	Myadm
ENSMUSG00000068606	3.92392	5.32655e-15	5.96949e-13	Gm4841
ENSMUSG00000068749	1.34573	3.16672e-05	0.000395702	Psma5
ENSMUSG00000068758	1.85476	1.1392e-07	2.86698e-06	Il3ra
ENSMUSG00000068860	-2.26171	0.000714868	0.00542007	Gm128
ENSMUSG00000068923	-1.49764	2.87621e-05	0.000364159	Syt11
ENSMUSG00000069094	-1.06888	1.59721e-10	7.76678e-09	Pde7a
ENSMUSG00000069114	-1.13592	0.00394493	0.0213708	Zbtb10
ENSMUSG00000069305	-1.88749	9.32017e-09	3.06646e-07	Hist1h4n
ENSMUSG00000069306	2.37276	9.32746e-07	1.85201e-05	Hist1h4m
ENSMUSG00000069607	-2.05844	5.71655e-07	1.20594e-05	Cd300ld3
ENSMUSG00000069792	1.93776	0.000436086	0.00359314	Wfdc17
ENSMUSG00000069805	3.33754	7.71114e-11	3.92256e-09	Fbp1
ENSMUSG00000069830	-1.0012	0.00361063	0.019898	Nlrp1a
ENSMUSG00000070044	-1.38634	0.000500916	0.00403915	Fam149a
ENSMUSG00000070056	-1.38762	1.57438e-09	6.13707e-08	Mfhas1
ENSMUSG00000070305	-1.06587	0.000167011	0.00159635	Mpzl3
ENSMUSG00000070315	-1.25678	7.77215e-08	2.03452e-06	4930581F22Rik
ENSMUSG00000070323	1.83755	6.53242e-11	3.43251e-09	Mmp27
ENSMUSG00000070331	-2.67247	8.49146e-05	0.000913119	Qrich2
ENSMUSG00000070348	-1.59661	4.20986e-05	0.000501999	Ccnd1
ENSMUSG00000070390	-1.28585	0.000215986	0.00199245	Nlrp1b
ENSMUSG00000070424	-2.00452	2.36513e-06	4.10748e-05	Art5
ENSMUSG00000070427	2.19161	6.89569e-16	8.60162e-14	Il18bp
ENSMUSG00000070436	-3.86384	1.17456e-07	2.92519e-06	Serpinh1
ENSMUSG00000070469	2.46866	0.000552687	0.0043634	Adamtsl3
ENSMUSG00000070498	-3.32859	5.36582e-08	1.46615e-06	Tmem132b
ENSMUSG00000070501	-1.0833	0.00034467	0.00295358	Ifi214
ENSMUSG00000070691	-1.32138	1.22437e-07	3.03345e-06	Runx3
ENSMUSG00000070803	1.63252	0.00039739	0.00333561	Cited4
ENSMUSG00000070867	-1.53808	0.00487025	0.0250677	Trabd2b
ENSMUSG00000070868	-9.63312	1.12946e-19	2.34813e-17	Skint3
ENSMUSG00000070873	1.42428	0.00222684	0.0135413	Lilra5
ENSMUSG00000070880	-1.53192	2.31726e-05	0.00030001	Gad1
ENSMUSG00000070891	-2.62135	6.07488e-07	1.27404e-05	Gm12689
ENSMUSG00000070942	1.58777	5.74933e-05	0.000659093	Il1rl2
ENSMUSG00000071037	-1.4115	3.11095e-06	5.20784e-05	Camkmt
ENSMUSG00000071042	-1.81835	3.33938e-11	1.85672e-09	Rasgrp3
ENSMUSG00000071252	1.58868	0.00265815	0.0155892	2210408I21Rik
ENSMUSG00000071341	-3.94218	6.81352e-07	1.41243e-05	Egr4
ENSMUSG00000071347	-3.22794	9.60324e-07	1.8975e-05	C1qtnf9
ENSMUSG00000071369	-1.11736	3.31427e-05	0.000409902	Map3k5
ENSMUSG00000071561	6.35689	6.17014e-44	1.43488e-40	BC100530
ENSMUSG00000071562	4.4377	1.25852e-33	1.00297e-30	Stfa1
ENSMUSG00000071661	1.08801	0.0109751	0.0473071	Zbtb3
ENSMUSG00000071714	1.07927	1.85129e-06	3.33208e-05	Csf2rb2
ENSMUSG00000071757	-1.37892	1.26486e-15	1.52474e-13	Zhx2
ENSMUSG00000072244	1.9504	0.000146234	0.00143175	Trim6
ENSMUSG00000072589	-1.03962	0.00901722	0.040728	Gm10371
ENSMUSG00000072601	-5.09446	1.37261e-22	3.93801e-20	Ear1
ENSMUSG00000072612	-1.37503	5.84297e-06	9.05155e-05	Gm10382
ENSMUSG00000072663	1.89279	1.506e-06	2.80566e-05	Spef2
ENSMUSG00000072673	-1.13087	0.0110629	0.0475998	Gm10392
ENSMUSG00000072683	2.90293	3.40417e-13	2.69547e-11	Gm7457
ENSMUSG00000072875	1.21489	0.00570098	0.0284652	Gpr27
ENSMUSG00000072941	-3.5664	0.000107127	0.00110796	Sod3
ENSMUSG00000072949	-2.73816	7.39887e-13	5.47097e-11	Acot1
ENSMUSG00000073008	-1.09941	7.2102e-06	0.000109104	Gpr174
ENSMUSG00000073028	2.87934	0.00028298	0.00249806	Igkv4-71
ENSMUSG00000073418	3.00415	5.28837e-25	1.99636e-22	C4b
ENSMUSG00000073489	1.74432	2.39213e-09	9.00658e-08	Ifi204
ENSMUSG00000073490	1.40938	4.2383e-13	3.2864e-11	Ifi207
ENSMUSG00000073491	1.26038	1.48729e-05	0.000203386	Ifi213
ENSMUSG00000073492	-1.41126	0.00571279	0.0284849	Gm10521
ENSMUSG00000073538	-1.46316	6.282e-09	2.1405e-07	E330020D12Rik
ENSMUSG00000073555	4.45206	1.31328e-31	7.84959e-29	Gm4951
ENSMUSG00000073600	-1.19942	0.0097571	0.0431553	Prob1
ENSMUSG00000073628	-2.19833	3.34497e-07	7.46246e-06	Gm10552
ENSMUSG00000073771	-1.11904	2.34088e-09	8.83683e-08	Btbd19
ENSMUSG00000073910	-1.36605	1.71271e-06	3.12978e-05	Mob3b
ENSMUSG00000074063	-1.19603	2.23606e-09	8.49301e-08	Osgin1
ENSMUSG00000074203	1.7542	0.000828722	0.006131	G430095P16Rik
ENSMUSG00000074213	1.11301	0.00010647	0.00110275	Gm10642
ENSMUSG00000074240	-1.13925	0.00152735	0.0100504	Cib3
ENSMUSG00000074259	1.49141	2.94584e-06	4.97155e-05	Gramd2
ENSMUSG00000074274	1.57381	4.7128e-05	0.000554141	D930028M14Rik
ENSMUSG00000074305	-1.52741	0.000896396	0.00652731	Peak1
ENSMUSG00000074345	4.38748	1.02627e-05	0.000148555	Tnfaip8l3
ENSMUSG00000074361	-1.62694	4.19129e-09	1.47725e-07	C5ar2
ENSMUSG00000074364	-2.79688	4.34507e-14	4.10066e-12	Ehd2
ENSMUSG00000074385	-2.55533	7.49585e-06	0.000113187	Gm10684
ENSMUSG00000074417	1.1991	0.00169422	0.0109525	Gm14548
ENSMUSG00000074420	3.69248	0.000346658	0.00296707	Gm10693
ENSMUSG00000074570	-1.53736	2.90627e-05	0.000366994	Cass4
ENSMUSG00000074607	-1.46453	0.000698811	0.00531519	Tox2
ENSMUSG00000074622	1.79693	1.06022e-05	0.000152241	Mafb
ENSMUSG00000074677	-2.00452	9.72525e-08	2.48236e-06	Sirpb1c
ENSMUSG00000074743	-2.70739	2.03046e-20	4.77491e-18	Thbd
ENSMUSG00000074783	-2.71448	6.90561e-08	1.83446e-06	AU019990
ENSMUSG00000074805	-2.61436	5.79244e-15	6.34294e-13	Il1bos
ENSMUSG00000074874	1.92481	2.40602e-06	4.17344e-05	Ctla2b
ENSMUSG00000074896	1.86034	5.18955e-10	2.27658e-08	Ifit3
ENSMUSG00000075010	2.25058	5.48548e-09	1.89613e-07	AW112010
ENSMUSG00000075031	-1.76577	1.0984e-08	3.5408e-07	Hist1h2bb
ENSMUSG00000075266	1.01925	0.00498534	0.0255046	Cenpw
ENSMUSG00000075269	-2.97161	0.00069451	0.00529089	Bex6
ENSMUSG00000075289	-1.41158	6.87468e-05	0.000766257	Carns1
ENSMUSG00000075420	1.61128	1.15128e-07	2.88222e-06	Smim6
ENSMUSG00000075602	1.14049	0.00379833	0.0207239	Ly6a
ENSMUSG00000075702	1.69599	0.000466529	0.00379601	Selenom
ENSMUSG00000076431	-2.22595	1.30609e-05	0.000181902	Sox4
ENSMUSG00000076435	-1.42396	1.47381e-11	8.70034e-10	Acsf2
ENSMUSG00000076531	-1.36913	8.93387e-05	0.000949306	Igkv4-92
ENSMUSG00000076534	1.26023	0.00783422	0.0364285	Igkv12-89
ENSMUSG00000076545	2.22854	0.00679619	0.032584	Igkv4-72
ENSMUSG00000076563	1.92737	0.000675402	0.00517556	Igkv5-48
ENSMUSG00000076564	1.3377	0.0017382	0.0111664	Igkv12-46
ENSMUSG00000076575	-6.07498	1.32441e-14	1.32858e-12	Igkv7-33
ENSMUSG00000076598	1.64765	1.51679e-07	3.67541e-06	Igkv3-7
ENSMUSG00000076612	2.09511	1.25879e-09	5.00203e-08	Ighg2c
ENSMUSG00000076613	1.18757	3.27765e-05	0.000407434	Ighg2b
ENSMUSG00000076614	1.30739	0.00159102	0.0103836	Ighg1
ENSMUSG00000076615	1.62356	7.19515e-07	1.48297e-05	Ighg3
ENSMUSG00000076665	-1.39405	0.00961633	0.0426946	Ighv7-1
ENSMUSG00000076666	1.68488	0.0039914	0.0215494	Ighv14-4
ENSMUSG00000076757	-1.54842	0.00884329	0.0400559	Tcrg-C4
ENSMUSG00000077704	-2.35483	6.63219e-07	1.37882e-05	Snord89
ENSMUSG00000077734	-1.47567	0.0020867	0.0128636	Snord83b
ENSMUSG00000077737	1.19075	0.00205047	0.012673	Snord72
ENSMUSG00000078349	-1.6315	2.97465e-08	8.63793e-07	AW011738
ENSMUSG00000078350	1.47491	0.00397542	0.0214873	Smim1
ENSMUSG00000078354	3.6702	1.16246e-07	2.90514e-06	Ifna2
ENSMUSG00000078486	-1.35614	1.07454e-05	0.000153989	Perm1
ENSMUSG00000078606	1.55469	0.00374523	0.0204746	Gm4070
ENSMUSG00000078780	-2.64952	3.03068e-15	3.50605e-13	Gm5150
ENSMUSG00000078789	-1.18328	5.05242e-06	7.95576e-05	Dph1
ENSMUSG00000078816	-2.44579	9.04225e-10	3.81503e-08	Prkcg
ENSMUSG00000078853	1.28431	1.32077e-05	0.000183412	Igtp
ENSMUSG00000078862	1.18085	9.10539e-06	0.000133282	Gm14326
ENSMUSG00000078920	1.86183	1.71809e-08	5.25502e-07	Ifi47
ENSMUSG00000078921	2.10778	3.26961e-09	1.17846e-07	Tgtp2
ENSMUSG00000078922	3.01014	3.8729e-09	1.38201e-07	Tgtp1
ENSMUSG00000078942	1.72474	2.5675e-05	0.000328553	Naip6
ENSMUSG00000079037	3.13536	8.74669e-36	8.36475e-33	Prnp
ENSMUSG00000079057	1.22822	4.09266e-05	0.00049047	Cyp4v3
ENSMUSG00000079164	-1.73707	3.95792e-05	0.000475913	Tlr5
ENSMUSG00000079192	-1.55339	0.00745936	0.034946	AC125149.1
ENSMUSG00000079197	1.23062	0.000113534	0.00116166	Psme2
ENSMUSG00000079227	1.72463	2.31566e-06	4.03157e-05	Ccr5
ENSMUSG00000079293	-2.166	2.294e-18	3.91756e-16	Clec7a
ENSMUSG00000079363	2.20994	3.31465e-05	0.000409902	Gbp4
ENSMUSG00000079418	1.06564	4.22814e-06	6.80725e-05	Atg4a
ENSMUSG00000079419	1.66354	3.71255e-05	0.000452862	Ms4a6c
ENSMUSG00000079445	-1.44092	0.000540509	0.00428799	B3gnt7
ENSMUSG00000079497	-1.93593	0.000383136	0.00323857	Gm13420
ENSMUSG00000079563	-1.43709	1.73273e-06	3.15833e-05	Pglyrp2
ENSMUSG00000079594	5.56182	3.92371e-21	9.70441e-19	BC117090
ENSMUSG00000079597	3.45906	7.57277e-21	1.81052e-18	Gm5483
ENSMUSG00000080316	1.1408	0.0107293	0.0464737	Spaca6
ENSMUSG00000080717	1.10165	0.00288828	0.0166328	B230307C23Rik
ENSMUSG00000080917	-2.3797	3.275e-05	0.000407434	Gm15925
ENSMUSG00000080927	6.42868	4.39817e-07	9.48748e-06	Gm11430
ENSMUSG00000081169	-1.56572	0.0111638	0.0478758	Gm12551
ENSMUSG00000081219	1.03864	0.000354297	0.00301805	Bambi-ps1
ENSMUSG00000081805	-1.45404	0.000116883	0.00118662	Gm14335
ENSMUSG00000082292	2.22162	6.02538e-13	4.52534e-11	Gm12250
ENSMUSG00000082436	-2.11838	0.000642898	0.0049801	Gm11688
ENSMUSG00000082776	-1.85561	0.00899817	0.0406687	Gm7061
ENSMUSG00000082976	3.47928	1.10165e-06	2.12408e-05	Gm15056
ENSMUSG00000083041	1.06875	0.00421437	0.0224741	Gmfg-ps
ENSMUSG00000083237	-2.33843	2.19839e-05	0.000287474	Gm11698
ENSMUSG00000083282	1.30529	5.77159e-05	0.000660762	Ctsf
ENSMUSG00000083430	-1.66367	1.44098e-05	0.000198008	Gm13006
ENSMUSG00000083457	-1.34676	0.0109675	0.0472886	Cyp4b1-ps2
ENSMUSG00000083816	-1.03822	0.000810906	0.0060116	Gm13033
ENSMUSG00000084792	-1.42538	0.00447343	0.023463	1700056N10Rik
ENSMUSG00000084807	-3.66412	1.40425e-15	1.67867e-13	Gm13073
ENSMUSG00000084968	-1.6639	0.000496774	0.00401026	Gm12743
ENSMUSG00000084970	-2.13945	0.00244515	0.0145845	1700060J05Rik
ENSMUSG00000085028	-1.0463	1.71884e-06	3.13699e-05	Slc2a4rg-ps
ENSMUSG00000085078	-2.6236	8.36472e-07	1.67821e-05	C030013C21Rik
ENSMUSG00000085178	-1.49675	0.000443475	0.00364564	Kdm6bos
ENSMUSG00000085223	-3.57403	1.69139e-17	2.60893e-15	Gm11210
ENSMUSG00000085241	1.00012	0.0109902	0.0473508	Snhg3
ENSMUSG00000085298	1.48961	2.39121e-05	0.000308471	F730035M05Rik
ENSMUSG00000085399	-1.66327	0.00149054	0.00985791	Foxd2os
ENSMUSG00000085465	2.41664	0.000164964	0.00158288	Gm15347
ENSMUSG00000085531	-1.78931	3.66648e-05	0.000448049	Slc36a3os
ENSMUSG00000085546	-1.75555	0.00197368	0.0122991	Gm14252
ENSMUSG00000085609	-1.95214	0.00182209	0.0116168	1700016P03Rik
ENSMUSG00000085666	-1.22119	0.0107087	0.0464238	Gm9855
ENSMUSG00000085723	2.14329	1.90259e-05	0.000253885	Gm15915
ENSMUSG00000085823	-1.08684	1.03347e-05	0.000149296	Gm13012
ENSMUSG00000085873	2.78112	0.00260046	0.0153198	Ttc39aos1
ENSMUSG00000085894	-2.22997	1.47332e-19	2.97673e-17	Gm15832
ENSMUSG00000085929	1.94169	1.05584e-05	0.000151763	Gm13421
ENSMUSG00000085971	-1.77722	1.03543e-06	2.02084e-05	Gm15411
ENSMUSG00000085977	5.08314	1.65365e-13	1.40717e-11	Gm5970
ENSMUSG00000086139	-3.72305	7.75533e-06	0.000116371	Gm11211
ENSMUSG00000086196	2.67833	2.01066e-06	3.58297e-05	Gm13571
ENSMUSG00000086296	-1.58193	6.25813e-05	0.000709107	D030055H07Rik
ENSMUSG00000086335	1.39222	0.00413418	0.0221287	Gm12107
ENSMUSG00000086438	2.35905	6.49428e-05	0.000732393	Asb17os
ENSMUSG00000086455	-1.44075	0.010593	0.0460892	Gm11815
ENSMUSG00000086533	-1.43491	0.000419897	0.00348779	Mypopos
ENSMUSG00000086564	-3.70433	3.48867e-43	6.25562e-40	Cd101
ENSMUSG00000086610	-1.59914	2.74051e-05	0.000347899	Gm15408
ENSMUSG00000086693	-1.50979	0.000763139	0.00571061	A730081D07Rik
ENSMUSG00000086706	-4.31067	4.98051e-19	9.15967e-17	Gm15848
ENSMUSG00000086836	1.93151	0.00331845	0.018595	Gm13748
ENSMUSG00000086866	1.48391	0.000586735	0.00458927	4930512H18Rik
ENSMUSG00000086899	-1.59194	0.00384477	0.0209469	1600002D24Rik
ENSMUSG00000087179	-1.3352	0.0040125	0.0216307	Gm14230
ENSMUSG00000087187	-1.33691	0.00018331	0.00172432	Gm13431
ENSMUSG00000087213	1.44477	0.000219889	0.0020194	2810408I11Rik
ENSMUSG00000087259	-1.75788	3.51449e-08	1.00831e-06	2610035D17Rik
ENSMUSG00000087263	-2.34737	6.24924e-05	0.000709107	Gm15726
ENSMUSG00000087277	-2.20489	1.30743e-13	1.15062e-11	2010013B24Rik
ENSMUSG00000087452	-2.44277	1.53328e-13	1.32499e-11	Gm11998
ENSMUSG00000087464	-1.76568	0.00474955	0.0245522	Gm12862
ENSMUSG00000087477	1.2674	0.00473836	0.0245208	Gm13822
ENSMUSG00000087538	-2.24804	0.000343848	0.00294962	Gm16341
ENSMUSG00000087541	1.46509	0.00303028	0.0172772	Hopxos
ENSMUSG00000087644	-1.1806	0.000299804	0.00261854	Gm14703
ENSMUSG00000089715	-1.22902	0.000115915	0.00117846	Cbx6
ENSMUSG00000089727	-1.78709	0.0117774	0.0497781	Klra8
ENSMUSG00000089762	-1.49932	1.09929e-05	0.000156597	Ier5l
ENSMUSG00000089809	-1.38248	9.92217e-07	1.94977e-05	Rasgef1b
ENSMUSG00000089849	-1.67251	0.000391172	0.00329319	Runx2os2
ENSMUSG00000089901	-2.33216	3.76732e-06	6.15514e-05	Gm8113
ENSMUSG00000089929	-1.00871	0.00172251	0.0110953	Bcl2a1b
ENSMUSG00000090083	2.33297	6.32612e-16	7.96037e-14	Rnf8
ENSMUSG00000090192	-1.67131	2.98305e-07	6.72829e-06	Gm16556
ENSMUSG00000090217	1.68932	0.00641995	0.0311234	Gm16116
ENSMUSG00000090231	2.83718	2.83771e-11	1.60897e-09	Cfb
ENSMUSG00000090236	-1.65638	0.00259603	0.0153	Car15
ENSMUSG00000090439	-3.24693	1.14942e-12	8.32752e-11	Gm17455
ENSMUSG00000090516	-1.01771	0.00677438	0.0325086	Rps11-ps1
ENSMUSG00000090523	1.16118	0.000244642	0.00221833	Gypc
ENSMUSG00000090631	-3.56555	5.39733e-08	1.47195e-06	Olfr456
ENSMUSG00000090665	-2.41627	2.12253e-25	8.45767e-23	Gad1-ps
ENSMUSG00000090942	3.98532	1.10837e-11	6.73807e-10	F830016B08Rik
ENSMUSG00000090963	1.39663	1.22971e-06	2.33644e-05	Gm17655
ENSMUSG00000091144	1.51072	9.24303e-08	2.37194e-06	Phf11c
ENSMUSG00000091534	1.34296	0.00809399	0.0374301	Gm17195
ENSMUSG00000091694	1.25275	0.0108495	0.0469065	Apol11b
ENSMUSG00000091996	-1.50252	5.6696e-05	0.000651164	BC049352
ENSMUSG00000092021	3.16916	1.73702e-13	1.46574e-11	Gbp11
ENSMUSG00000092305	-1.76224	4.49274e-11	2.42287e-09	Prps1l1
ENSMUSG00000092482	-1.7293	2.5194e-06	4.34908e-05	Gm20531
ENSMUSG00000092737	-1.37452	0.00270212	0.0158018	Gm24022
ENSMUSG00000092748	-1.18358	0.00826938	0.0379841	Gm22175
ENSMUSG00000092920	-1.34841	1.13514e-06	2.18279e-05	Mirt2
ENSMUSG00000093424	1.24112	0.000118788	0.0012034	6330562C20Rik
ENSMUSG00000093575	1.21131	0.00262244	0.0154176	Gm20695
ENSMUSG00000093765	2.39462	2.06056e-08	6.1749e-07	Gm20658
ENSMUSG00000093861	-1.05327	3.28458e-05	0.000407848	Igkv1-110
ENSMUSG00000093954	6.64128	8.62496e-08	2.22928e-06	Gm16867
ENSMUSG00000094134	1.94805	1.22343e-05	0.000171892	Ighv5-15
ENSMUSG00000094315	2.28524	0.00128885	0.00873752	Igkv4-78
ENSMUSG00000094504	2.08547	2.4722e-05	0.00031806	Gm5294
ENSMUSG00000094621	-2.10015	2.36392e-07	5.46943e-06	CAAA01098150.1
ENSMUSG00000094763	-1.95287	0.00248629	0.0147868	Gm1647
ENSMUSG00000095007	1.05252	0.000300009	0.00261854	Igkv12-41
ENSMUSG00000095028	-1.70318	1.25565e-09	5.00203e-08	Sirpb1b
ENSMUSG00000095105	-1.36783	4.14847e-06	6.69402e-05	Edaradd
ENSMUSG00000095134	-5.01938	2.8516e-12	1.90262e-10	Mid1-ps1
ENSMUSG00000095369	-1.49926	0.00100208	0.00712682	Gm21859
ENSMUSG00000095440	3.54957	2.39388e-17	3.65321e-15	Fignl2
ENSMUSG00000095497	-1.12911	0.0020973	0.0129068	Igkv1-122
ENSMUSG00000095609	1.67072	7.34201e-08	1.92896e-06	Gm21188
ENSMUSG00000095620	4.12719	7.92806e-34	7.108e-31	2010005H15Rik
ENSMUSG00000095682	1.96434	0.00104217	0.00732841	Igkv3-1
ENSMUSG00000095704	-2.9278	7.87716e-07	1.59602e-05	Gm8221
ENSMUSG00000096108	-1.14364	0.00187157	0.0118428	Ighv11-2
ENSMUSG00000096210	1.53085	1.85543e-10	8.9017e-09	H1f0
ENSMUSG00000096499	1.12663	0.00253341	0.0150075	Ighv1-5
ENSMUSG00000096712	1.11781	0.00711077	0.0336536	Gm15454
ENSMUSG00000096768	1.59971	0.00181808	0.0116055	Gm47283
ENSMUSG00000096805	1.05095	0.0102582	0.0448389	Ighv9-1
ENSMUSG00000096833	1.4306	0.00301937	0.0172445	Igkv4-55
ENSMUSG00000096917	1.78794	3.14845e-10	1.44295e-08	2500002B13Rik
ENSMUSG00000096950	-3.57594	2.5371e-11	1.46163e-09	Gm9530
ENSMUSG00000096956	-2.63876	1.23476e-08	3.9469e-07	Snhg18
ENSMUSG00000097000	1.18721	4.46114e-06	7.13434e-05	Gm17435
ENSMUSG00000097062	1.70515	2.08905e-08	6.24321e-07	Gm17586
ENSMUSG00000097080	1.73313	0.000176546	0.00166945	1700086O06Rik
ENSMUSG00000097108	-2.49113	8.41469e-08	2.1828e-06	Gm26581
ENSMUSG00000097125	-1.63959	9.47449e-07	1.87464e-05	Gm26885
ENSMUSG00000097134	-1.6172	0.00378458	0.0206661	1110002J07Rik
ENSMUSG00000097145	1.62873	0.00153004	0.0100557	9230114K14Rik
ENSMUSG00000097233	-1.21687	0.00335762	0.0187705	Gm17552
ENSMUSG00000097258	-1.34871	0.0020387	0.0126237	Gm26767
ENSMUSG00000097296	-1.111	6.66522e-05	0.000748142	Gm26532
ENSMUSG00000097301	-2.30587	4.02454e-08	1.12978e-06	AW121686
ENSMUSG00000097354	-1.33297	7.71398e-07	1.57407e-05	2310001H17Rik
ENSMUSG00000097369	-2.2077	0.000517522	0.00415669	Gm26545
ENSMUSG00000097418	-1.95781	0.000315758	0.00273835	Mir155hg
ENSMUSG00000097472	-1.20499	0.00620874	0.0303147	Gm26586
ENSMUSG00000097536	-1.16868	0.00074757	0.00561461	2610037D02Rik
ENSMUSG00000097557	-1.20487	0.00449353	0.023534	C130060C02Rik
ENSMUSG00000097567	1.16494	1.31627e-05	0.000183081	Gm26637
ENSMUSG00000097576	-1.29897	5.35777e-05	0.000619817	D930030I03Rik
ENSMUSG00000097589	-1.00154	4.12296e-09	1.45674e-07	Dleu2
ENSMUSG00000097668	3.53765	9.1426e-05	0.000965763	Gm26761
ENSMUSG00000097742	-4.31185	2.9219e-10	1.35646e-08	Gm26535
ENSMUSG00000097746	-1.20946	0.000672972	0.00516521	Gm6225
ENSMUSG00000097754	-2.07459	1.89805e-10	9.07583e-09	Ptgs2os2
ENSMUSG00000097755	1.16277	0.00257226	0.0151973	2010110K18Rik
ENSMUSG00000097779	-1.00704	1.13552e-05	0.000161598	4833407H14Rik
ENSMUSG00000097784	1.30924	0.0112361	0.0480788	A430105J06Rik
ENSMUSG00000097792	-1.59922	0.00663411	0.0319491	Gm27042
ENSMUSG00000097842	-1.24113	0.001545	0.010134	9330104G04Rik
ENSMUSG00000097944	-1.48453	2.51536e-07	5.7918e-06	A130014A01Rik
ENSMUSG00000098434	1.60514	0.00440009	0.0231715	2010110E17Rik
ENSMUSG00000098489	-1.45021	9.83831e-07	1.93861e-05	Mir7678
ENSMUSG00000098715	-1.66639	3.79074e-07	8.35302e-06	Gm28053
ENSMUSG00000098934	2.17305	3.89846e-08	1.10303e-06	Gm18853
ENSMUSG00000099241	2.41936	7.9821e-06	0.00011922	Gm18852
ENSMUSG00000099474	1.31978	0.000174795	0.00165616	1700097N02Rik
ENSMUSG00000099517	1.11673	0.00994007	0.0437561	Hist1h3g
ENSMUSG00000099600	-2.30143	1.02984e-05	0.000148922	Gm29126
ENSMUSG00000099696	-2.85143	0.0010156	0.00719841	2900052N01Rik
ENSMUSG00000099719	-1.98658	0.00391494	0.0212646	Gm28802
ENSMUSG00000099871	-6.26447	3.64281e-08	1.04096e-06	Gm21742
ENSMUSG00000100127	-2.18824	0.00627634	0.0305484	Gsdmcl-ps
ENSMUSG00000100182	-1.42866	7.82204e-06	0.000117127	1810006J02Rik
ENSMUSG00000100183	1.7242	2.22046e-06	3.89872e-05	Gm28512
ENSMUSG00000100465	1.21713	5.31134e-06	8.31781e-05	Gm29264
ENSMUSG00000100629	-1.37636	1.06458e-05	0.000152715	Gm28192
ENSMUSG00000100783	2.81246	3.24972e-11	1.8139e-09	2310047D07Rik
ENSMUSG00000101111	-1.10319	0.00229211	0.013869	Gm28437
ENSMUSG00000101162	-1.34348	0.00434131	0.0229473	Gm26728
ENSMUSG00000101191	-1.20457	5.32848e-05	0.000617424	Gm28809
ENSMUSG00000101268	-3.17065	5.0134e-17	7.19172e-15	2010310C07Rik
ENSMUSG00000101389	2.2818	9.43779e-07	1.86996e-05	Ms4a4a
ENSMUSG00000101517	-2.05857	3.90037e-10	1.75946e-08	4732465J04Rik
ENSMUSG00000101859	-4.29959	1.27023e-06	2.39755e-05	Gm29233
ENSMUSG00000101905	-1.54559	0.00703445	0.0333805	4930439D14Rik
ENSMUSG00000101939	-7.63405	3.92399e-12	2.53557e-10	Gm28438
ENSMUSG00000102155	-1.09425	0.000324457	0.00280551	Gm37468
ENSMUSG00000102171	-2.27822	0.00103479	0.00728367	NA
ENSMUSG00000102196	-1.46691	0.00134722	0.00907742	Gm38171
ENSMUSG00000102305	-1.19072	0.0010924	0.0076181	Gm38192
ENSMUSG00000102524	-1.56733	0.0067568	0.0324602	Ighv1-2
ENSMUSG00000102713	-1.47836	0.0052952	0.0266806	Gm29994
ENSMUSG00000102777	1.40835	0.00515183	0.0261141	Gm38161
ENSMUSG00000102856	-1.21361	0.00605327	0.0298092	Gm37084
ENSMUSG00000103094	-1.59882	0.00222308	0.0135279	Gm37558
ENSMUSG00000103105	3.88328	5.11081e-06	8.02128e-05	Gm18752
ENSMUSG00000103174	-3.9563	2.25679e-10	1.06143e-08	Gm37168
ENSMUSG00000103303	-1.96948	0.0003204	0.00277377	Gm37802
ENSMUSG00000103556	2.89239	3.19404e-16	4.24245e-14	Gm38215
ENSMUSG00000103785	2.26492	0.000149896	0.00145879	Gm35025
ENSMUSG00000103907	-1.59916	0.00800191	0.037112	Gm37498
ENSMUSG00000103995	-1.50314	5.5374e-05	0.000637512	5730488B01Rik
ENSMUSG00000104068	-3.0701	7.4469e-05	0.000820544	Gm37199
ENSMUSG00000104348	-1.81611	1.75182e-16	2.43979e-14	Gm37691
ENSMUSG00000104367	-1.99077	0.00051994	0.00416911	Gm38079
ENSMUSG00000104388	-1.88352	2.2581e-05	0.000294209	Gm37033
ENSMUSG00000104554	-2.26102	9.17688e-10	3.84919e-08	Gm4610
ENSMUSG00000104654	-1.69591	0.0034722	0.019317	Gm43814
ENSMUSG00000104713	2.91931	1.2482e-11	7.49182e-10	Gbp6
ENSMUSG00000104814	-1.95102	0.000850789	0.0062684	Gm42979
ENSMUSG00000104927	-1.74375	1.92416e-07	4.53981e-06	Gm43388
ENSMUSG00000104955	4.52617	2.36152e-08	6.98474e-07	1700016F12Rik
ENSMUSG00000105107	-1.18069	0.000240314	0.00218461	Gm43412
ENSMUSG00000105128	-1.63254	2.00201e-05	0.000265027	Gm42870
ENSMUSG00000105231	-1.90332	0.00278974	0.0162019	Iglj3
ENSMUSG00000105703	-2.84708	1.978e-10	9.4267e-09	Gm43305
ENSMUSG00000105826	-1.26715	0.00525922	0.0265366	Gm42141
ENSMUSG00000106243	-1.51932	0.00672718	0.0323396	Gm5050
ENSMUSG00000106325	-2.9726	8.9439e-11	4.51761e-09	Ighv8-10
ENSMUSG00000106357	-1.22718	0.00433234	0.0229334	Gm8013
ENSMUSG00000106438	3.44199	7.09389e-10	3.03767e-08	Gm32051
ENSMUSG00000106518	-1.14397	0.000155541	0.00150861	Gm42759
ENSMUSG00000106567	-2.6096	1.09214e-13	9.67082e-12	2010309G21Rik
ENSMUSG00000106609	1.24144	0.00687113	0.0328336	Gm43181
ENSMUSG00000106668	-1.11112	0.00145408	0.00967028	Iglj1
ENSMUSG00000107317	1.81409	1.38346e-06	2.59762e-05	Gm19719
ENSMUSG00000107480	1.26024	0.00505379	0.025708	Gm44165
ENSMUSG00000107812	2.27908	5.04456e-05	0.000587849	Gm43935
ENSMUSG00000107846	-1.43512	0.00427538	0.0227487	Gm43963
ENSMUSG00000107994	1.06795	0.000935679	0.0067415	D830050J10Rik
ENSMUSG00000108015	-2.03889	0.000130807	0.00130398	Gm32591
ENSMUSG00000108030	-1.37828	0.00575338	0.0286371	9530062K07Rik
ENSMUSG00000108059	-2.34716	7.23457e-11	3.73309e-09	Gm44369
ENSMUSG00000108090	-2.22552	6.15313e-06	9.47067e-05	Gm6637
ENSMUSG00000108126	-1.60747	0.000688408	0.00525277	Gm43909
ENSMUSG00000108234	-2.09547	3.16383e-07	7.10252e-06	Gm44428
ENSMUSG00000108268	-1.12507	0.00032862	0.00283638	Gm44187
ENSMUSG00000108320	-1.50654	0.000672456	0.0051645	Gm44877
ENSMUSG00000108368	-2.46927	6.53948e-14	5.93727e-12	Gm45053
ENSMUSG00000108436	-2.00142	0.00402511	0.0216635	Gm44851
ENSMUSG00000108563	1.5319	8.24545e-05	0.000891341	Gm44686
ENSMUSG00000108676	-2.68906	0.000115793	0.00117805	1700123J17Rik
ENSMUSG00000108714	-1.36315	0.00115348	0.00795516	Gm21057
ENSMUSG00000108859	-1.31761	0.00182506	0.0116241	Gm44776
ENSMUSG00000109305	-2.54871	2.93643e-08	8.54422e-07	1810010D01Rik
ENSMUSG00000109589	-1.7539	0.00274664	0.0160145	Gm45267
ENSMUSG00000109729	1.2761	0.000527436	0.00420805	Gm45418
ENSMUSG00000109751	1.8287	0.00448602	0.0235033	Gm45479
ENSMUSG00000109799	-2.34184	1.78431e-05	0.000239663	Gm45515
ENSMUSG00000109841	-3.2827	0.00010471	0.00108766	E330011O21Rik
ENSMUSG00000109953	-1.38495	0.00274965	0.0160145	5430430B14Rik
ENSMUSG00000110060	1.56597	0.00534897	0.0268703	Gm9860
ENSMUSG00000110125	1.23478	0.000406692	0.00339509	Gm33148
ENSMUSG00000110357	-1.87782	8.47091e-11	4.29382e-09	A030001D20Rik
ENSMUSG00000110386	-6.24921	3.99944e-78	2.8686e-74	Gm42031
ENSMUSG00000110498	-1.26965	1.28272e-06	2.41694e-05	A630001O12Rik
ENSMUSG00000110537	-1.55697	0.00142854	0.00954466	Gm4316
ENSMUSG00000110570	-1.38235	0.00152553	0.0100476	Gm45778
ENSMUSG00000110622	-1.8638	5.52794e-09	1.90621e-07	Gm16486
ENSMUSG00000110626	-1.78794	0.00284924	0.0164476	Gm45805
ENSMUSG00000110631	1.54132	0.0046235	0.0240479	Gm42047
ENSMUSG00000110697	-1.15717	3.95164e-05	0.000475556	Gm31718
ENSMUSG00000111053	-3.76509	1.21014e-06	2.30843e-05	AC164092.1
ENSMUSG00000111147	1.36401	0.00198724	0.0123621	AC160562.1
ENSMUSG00000111167	-2.39562	1.45658e-28	6.74019e-26	Gm39321
ENSMUSG00000111377	-1.89004	0.00372894	0.0204166	Gm40634
ENSMUSG00000111378	-1.59779	0.000406863	0.00339509	Gm47230
ENSMUSG00000111639	-1.56651	1.16521e-06	2.22866e-05	AC117245.2
ENSMUSG00000111818	-2.38828	9.29527e-05	0.000979006	Gm17749

## Sheet: Significant DEGs_lungs
SUPPLEMENTARY TABLE 4
DATA: DEGs of neutrophils isolated from the lung of IL-1R1 KO mice compared to C57BL/6 mice
ID	log2FoldChange	pvalue	padj	Gene.name
ENSMUSG00000000001	1.01547	4.52e-08	7.84e-07	Gnai3
ENSMUSG00000000093	-1.20613	5.81e-06	5.92e-05	Tbx2
ENSMUSG00000000134	1.03224	2.43e-10	6.76e-09	Tfe3
ENSMUSG00000000157	3.34356	7.6e-18	6.67e-16	Itgb2l
ENSMUSG00000000204	2.47144	2.26e-26	7.3e-24	Slfn4
ENSMUSG00000000216	1.31459	0.00747412	0.0258321	Scnn1g
ENSMUSG00000000244	-1.01939	1.84e-07	2.78e-06	Tspan32
ENSMUSG00000000253	-1.15217	1.45e-05	0.00013124	Gmpr
ENSMUSG00000000326	-1.17386	7.17e-11	2.22e-09	Comt
ENSMUSG00000000359	-1.99404	0.00628184	0.0224826	Rem1
ENSMUSG00000000365	-1.31183	0.00943564	0.0313748	Rnf17
ENSMUSG00000000440	-1.23842	3.61e-09	7.88e-08	Pparg
ENSMUSG00000000489	-2.19532	4.13e-17	3.26e-15	Pdgfb
ENSMUSG00000000531	-2.13237	1.34e-09	3.22e-08	Grasp
ENSMUSG00000000532	1.09512	2.98e-09	6.63e-08	Acvr1b
ENSMUSG00000000562	1.47902	7.4e-07	9.44e-06	Adora3
ENSMUSG00000000594	-1.05927	2.92e-22	4.6e-20	Gm2a
ENSMUSG00000000693	-2.42189	2.24e-10	6.31e-09	Loxl3
ENSMUSG00000000730	1.30096	0.000969618	0.00471693	Dnmt3l
ENSMUSG00000000794	-2.47981	3.2e-14	1.77e-12	Kcnn3
ENSMUSG00000000805	-2.76875	1.03e-45	2.45e-42	Car4
ENSMUSG00000000861	-1.41478	0.00738579	0.0255766	Bcl11a
ENSMUSG00000000881	-1.74252	4.68e-09	9.94e-08	Dlg3
ENSMUSG00000000884	-1.06399	0.00217597	0.00929689	Gnb1l
ENSMUSG00000000915	1.3126	2.67e-06	2.98e-05	Hip1r
ENSMUSG00000000982	1.14131	0.00270792	0.0111787	Ccl3
ENSMUSG00000000983	1.0811	0.0150557	0.0458447	Wfdc18
ENSMUSG00000001025	1.93605	0.0127577	0.0402027	S100a6
ENSMUSG00000001034	1.02101	3.52e-12	1.45e-10	Mapk7
ENSMUSG00000001098	1.33077	2.36e-18	2.22e-16	Kctd10
ENSMUSG00000001120	-1.11078	0.00158566	0.00715738	Pcbp3
ENSMUSG00000001131	1.24914	9.01e-06	8.69e-05	Timp1
ENSMUSG00000001247	-1.02091	2.19e-06	2.52e-05	Lsr
ENSMUSG00000001249	-1.32009	1.75e-05	0.000155193	Hpn
ENSMUSG00000001441	1.52288	5.93e-20	7.08e-18	Npepps
ENSMUSG00000001444	-1.0259	0.00501088	0.0185702	Tbx21
ENSMUSG00000001493	-2.28791	0.00034775	0.00199991	Meox1
ENSMUSG00000001552	-1.27927	9.17e-06	8.82e-05	Jup
ENSMUSG00000001663	-2.17598	1.34e-08	2.59e-07	Gstt1
ENSMUSG00000001665	-1.21689	1.65e-05	0.000147611	Gstt3
ENSMUSG00000001739	1.32886	0.000349721	0.00200962	Cldn15
ENSMUSG00000001741	1.50601	3.63e-10	9.87e-09	Il16
ENSMUSG00000001763	-3.18416	1.13e-25	3.16e-23	Tspan33
ENSMUSG00000001911	-1.13988	3.97e-07	5.41e-06	Nfix
ENSMUSG00000002006	-2.17914	0.00369643	0.0145053	Pdzd4
ENSMUSG00000002007	-1.73415	0.0128133	0.0403128	Srpk3
ENSMUSG00000002020	-2.13443	1.21e-17	1.03e-15	Ltbp2
ENSMUSG00000002033	-1.02738	0.00193623	0.00842393	Cd3g
ENSMUSG00000002100	-1.16279	5.92e-06	6.01e-05	Mybpc3
ENSMUSG00000002104	-3.54328	7.31e-09	1.49e-07	Rapsn
ENSMUSG00000002105	-1.37998	1.71e-16	1.28e-14	Slc39a13
ENSMUSG00000002108	-1.08497	2.53e-07	3.66e-06	Nr1h3
ENSMUSG00000002204	1.17704	3.3e-07	4.63e-06	Napsa
ENSMUSG00000002228	-2.52607	1.09e-13	5.59e-12	Ppm1j
ENSMUSG00000002289	-1.84514	5.99e-09	1.25e-07	Angptl4
ENSMUSG00000002307	1.91105	1.4e-16	1.05e-14	Daxx
ENSMUSG00000002504	-1.2583	1.16e-06	1.43e-05	Slc9a3r2
ENSMUSG00000002578	1.57597	0.00203284	0.00879843	Ikzf4
ENSMUSG00000002602	-1.6778	1.06e-09	2.61e-08	Axl
ENSMUSG00000002763	-1.00814	4.8e-12	1.91e-10	Pex6
ENSMUSG00000002963	1.23387	5.11e-06	5.29e-05	Pnkp
ENSMUSG00000002985	-2.75758	2.3e-28	9.92e-26	Apoe
ENSMUSG00000003134	1.49132	1.8e-23	3.77e-21	Tbc1d8
ENSMUSG00000003161	1.21021	1.17e-07	1.84e-06	Sri
ENSMUSG00000003271	-1.29071	0.00101449	0.0048993	Sult2b1
ENSMUSG00000003355	1.16943	0.00520055	0.0191681	Fkbp11
ENSMUSG00000003379	-1.1996	0.00116321	0.00550412	Cd79a
ENSMUSG00000003420	-1.79043	1.31e-12	5.68e-11	Fcgrt
ENSMUSG00000003526	-1.20917	6.8e-05	0.000500281	Prodh
ENSMUSG00000003541	1.40686	7.69e-10	1.93e-08	Ier3
ENSMUSG00000003545	-1.13866	2.02e-05	0.000175264	Fosb
ENSMUSG00000003585	-1.19172	2.21e-05	0.000189004	Sec14l2
ENSMUSG00000003849	2.07681	8.27e-24	1.81e-21	Nqo1
ENSMUSG00000003882	1.0866	1.98e-10	5.64e-09	Il7r
ENSMUSG00000003948	-1.12957	5.43e-10	1.41e-08	Mmd
ENSMUSG00000003955	1.71258	1.16e-11	4.19e-10	Fam162a
ENSMUSG00000004110	-1.39928	0.0099526	0.0327902	Cacna1e
ENSMUSG00000004187	-1.62524	0.00440742	0.0167444	Kifc2
ENSMUSG00000004296	-4.00404	7.33e-08	1.2e-06	Il12b
ENSMUSG00000004552	1.00196	6.95e-06	6.91e-05	Ctse
ENSMUSG00000004562	-3.64797	1.78e-28	7.91e-26	Arhgef40
ENSMUSG00000004609	1.55668	2.53e-17	2.03e-15	Cd33
ENSMUSG00000004661	1.25916	5.17e-10	1.36e-08	Arid3b
ENSMUSG00000004668	4.36797	2.57e-14	1.48e-12	Abca13
ENSMUSG00000004771	1.03803	4.92e-07	6.56e-06	Rab11a
ENSMUSG00000004864	2.1762	2.49e-08	4.57e-07	Mapk13
ENSMUSG00000004891	-1.51601	7e-05	0.000512306	Nes
ENSMUSG00000004933	-1.8022	6.44e-10	1.65e-08	Matk
ENSMUSG00000004936	1.26425	1.76e-19	1.94e-17	Map2k1
ENSMUSG00000004947	1.33409	1.25e-17	1.06e-15	Dtx2
ENSMUSG00000005043	-1.27102	3.09e-08	5.59e-07	Sgsh
ENSMUSG00000005045	-1.97409	8.64e-05	0.000611632	Chd5
ENSMUSG00000005054	1.18439	7.1e-10	1.8e-08	Cstb
ENSMUSG00000005089	1.35594	1.96e-14	1.15e-12	Slc1a2
ENSMUSG00000005125	2.25421	1.49e-22	2.52e-20	Ndrg1
ENSMUSG00000005148	1.02489	0.0011358	0.00538679	Klf5
ENSMUSG00000005237	-1.28718	0.00581602	0.0210327	Dnah2
ENSMUSG00000005413	1.55706	6.94e-11	2.16e-09	Hmox1
ENSMUSG00000005465	-1.79282	1.09e-08	2.15e-07	Il27ra
ENSMUSG00000005474	2.15763	0.000277717	0.00163828	Myl10
ENSMUSG00000005540	-2.43539	9.53e-05	0.000666232	Fcer2a
ENSMUSG00000005583	-1.67795	2.14e-05	0.000184157	Mef2c
ENSMUSG00000005677	-1.80524	0.0063222	0.0226043	Nr1i3
ENSMUSG00000005800	3.08736	9.34e-05	0.0006555	Mmp8
ENSMUSG00000005824	-1.03129	0.000142358	0.000932896	Tnfsf14
ENSMUSG00000005947	-3.56359	5.78e-26	1.68e-23	Itgae
ENSMUSG00000005950	-1.51023	2.47e-06	2.79e-05	P2rx5
ENSMUSG00000005986	-1.32094	5.75e-13	2.62e-11	Ankrd13d
ENSMUSG00000006014	1.80363	7.47e-05	0.000540351	Prg4
ENSMUSG00000006154	-1.69396	8.91e-05	0.00063001	Eps8l1
ENSMUSG00000006179	1.75031	2.37e-07	3.47e-06	Prss16
ENSMUSG00000006205	-1.67424	3.7e-12	1.52e-10	Htra1
ENSMUSG00000006241	-2.80583	0.000101016	0.000701661	Ccdc159
ENSMUSG00000006281	-1.30991	6.38e-11	2e-09	Tep1
ENSMUSG00000006304	1.00546	3.66e-10	9.92e-09	Arpc2
ENSMUSG00000006345	3.36253	0.00292249	0.0119054	Ggt1
ENSMUSG00000006362	-1.96013	1.49e-08	2.85e-07	Cbfa2t3
ENSMUSG00000006378	-1.17362	0.000807817	0.0040634	Gcat
ENSMUSG00000006386	-1.1612	0.00564242	0.0205041	Tek
ENSMUSG00000006411	-1.28651	8.46e-09	1.7e-07	Nectin4
ENSMUSG00000006418	1.15541	2.57e-19	2.7e-17	Rnf114
ENSMUSG00000006522	8.54235	2.82e-05	0.000232628	Itih3
ENSMUSG00000006576	-2.66178	0.000114427	0.000780337	Slc4a3
ENSMUSG00000006611	-1.35729	1.32e-09	3.17e-08	Hfe
ENSMUSG00000006678	-1.25697	7.61e-10	1.91e-08	Pola1
ENSMUSG00000006800	-2.15274	1.64e-15	1.1e-13	Sulf2
ENSMUSG00000006818	1.06372	4.41e-08	7.68e-07	Sod2
ENSMUSG00000006931	1.02099	0.00950724	0.0315538	P3h4
ENSMUSG00000007080	-1.21195	0.0014492	0.00663847	Pole
ENSMUSG00000007646	-1.39134	3e-05	0.000244829	Rad51c
ENSMUSG00000007659	1.54386	1.12e-07	1.77e-06	Bcl2l1
ENSMUSG00000007877	2.56776	5.09e-05	0.000387776	Tcap
ENSMUSG00000007888	-3.11037	0.000166835	0.00106704	Crlf1
ENSMUSG00000008136	1.47322	0.0043281	0.0164872	Fhl2
ENSMUSG00000008153	-2.71115	0.000580559	0.00308986	Clstn3
ENSMUSG00000008193	-1.25986	4.55e-05	0.000351633	Spib
ENSMUSG00000008393	1.45808	1.65e-08	3.14e-07	Carhsp1
ENSMUSG00000008496	-1.06769	0.00107661	0.00514232	Pou2f2
ENSMUSG00000008734	2.00019	2.75e-09	6.17e-08	Gprc5b
ENSMUSG00000008845	2.42657	0.000816095	0.00409634	Cd163
ENSMUSG00000009185	-2.79244	7.74e-43	1.22e-39	Ccl8
ENSMUSG00000009376	1.89411	1.78e-20	2.28e-18	Met
ENSMUSG00000009545	-1.78776	0.0152811	0.0463821	Kcnq1
ENSMUSG00000009614	-1.13009	0.0128102	0.0403128	Sardh
ENSMUSG00000009621	-1.79569	1.95e-24	4.69e-22	Vav2
ENSMUSG00000009654	1.71246	1.17e-05	0.000109483	Oit3
ENSMUSG00000009876	-1.63355	4.65e-07	6.22e-06	Cox4i2
ENSMUSG00000009907	1.24569	2.9e-09	6.47e-08	Vps4b
ENSMUSG00000010021	-1.88353	2.62e-07	3.78e-06	Kif19a
ENSMUSG00000010342	-1.19636	0.00292524	0.0119132	Tex14
ENSMUSG00000010362	-1.52938	2.5e-11	8.51e-10	Rdm1
ENSMUSG00000010461	-2.30443	0.00030021	0.00175674	Eya4
ENSMUSG00000010651	-4.34599	3.52e-09	7.73e-08	Acaa1b
ENSMUSG00000010660	-1.86419	1.08e-09	2.64e-08	Plcd1
ENSMUSG00000010663	-1.57733	3.6e-14	1.97e-12	Fads1
ENSMUSG00000011148	1.1632	9.14e-12	3.42e-10	Adssl1
ENSMUSG00000011752	1.27586	2.76e-14	1.56e-12	Pgam1
ENSMUSG00000012705	-1.30697	0.0119823	0.0381546	Retn
ENSMUSG00000013033	-1.44609	0.000890642	0.00439443	Adgrl1
ENSMUSG00000013236	-1.12793	0.00227028	0.00962953	Ptprs
ENSMUSG00000013415	3.65657	2.39e-11	8.24e-10	Igf2bp1
ENSMUSG00000013523	-1.8304	0.000539132	0.0029009	Bcas1
ENSMUSG00000013936	1.35217	0.0160674	0.0483143	Myl2
ENSMUSG00000013974	1.09037	5.97e-06	6.05e-05	Mcemp1
ENSMUSG00000014329	1.00897	0.00928728	0.0309394	Bicc1
ENSMUSG00000014453	-2.09215	0.000155156	0.00100455	Blk
ENSMUSG00000014543	1.33222	0.00203114	0.00879378	Klra17
ENSMUSG00000014602	-1.28347	3.95e-05	0.000312173	Kif1a
ENSMUSG00000014725	-1.92335	0.00686179	0.0241446	Adam28
ENSMUSG00000014782	1.83474	4.46e-11	1.44e-09	Plekhg4
ENSMUSG00000014791	-1.07099	0.00126091	0.00590155	Elmo3
ENSMUSG00000014846	-1.89482	9.18e-12	3.42e-10	Tppp3
ENSMUSG00000015083	-1.63705	1.12e-05	0.000104997	C8g
ENSMUSG00000015316	1.28965	1.54e-10	4.5e-09	Slamf1
ENSMUSG00000015396	-2.53132	5.57e-16	3.97e-14	Cd83
ENSMUSG00000015441	5.23181	6.91e-05	0.000506314	Gzmf
ENSMUSG00000015468	2.46195	3.5e-20	4.36e-18	Notch4
ENSMUSG00000015709	-1.53774	0.00151033	0.00687414	Arnt2
ENSMUSG00000015850	2.72918	4.26e-31	2.16e-28	Adamtsl4
ENSMUSG00000015852	-6.9511	2.71e-09	6.11e-08	Fcrls
ENSMUSG00000015932	1.49744	6.12e-07	8e-06	Dstn
ENSMUSG00000015957	-1.88992	3.29e-05	0.000265243	Wnt11
ENSMUSG00000015968	1.18202	0.000342218	0.0019705	Cacna1d
ENSMUSG00000016024	1.12929	1.04e-07	1.65e-06	Lbp
ENSMUSG00000016128	-1.65112	1.26e-05	0.000116928	Stard13
ENSMUSG00000016194	2.65405	3.79e-19	3.85e-17	Hsd11b1
ENSMUSG00000016356	-1.24204	0.000153503	0.00099488	Col20a1
ENSMUSG00000016529	1.43751	3.41e-05	0.000273887	Il10
ENSMUSG00000016756	1.90059	3.71e-11	1.23e-09	Cmah
ENSMUSG00000016763	-2.65023	1.11e-05	0.000104925	Scube1
ENSMUSG00000016995	-1.32727	0.0152739	0.04637	Matn4
ENSMUSG00000017002	1.63848	3.89e-07	5.32e-06	Slpi
ENSMUSG00000017314	-1.74449	0.00563809	0.0204988	Mpp2
ENSMUSG00000017412	-1.37467	0.0131894	0.0412309	Cacnb4
ENSMUSG00000017417	-2.23907	1.98e-17	1.61e-15	Plxdc1
ENSMUSG00000017418	1.06678	7.03e-05	0.000513236	Arl5b
ENSMUSG00000017446	1.10378	0.0109327	0.0353434	C1qtnf1
ENSMUSG00000017607	-2.47507	1.28e-13	6.52e-12	Tns4
ENSMUSG00000017639	-1.30984	7.18e-07	9.19e-06	Rab11fip4
ENSMUSG00000017677	1.45796	5.25e-10	1.38e-08	Wsb1
ENSMUSG00000017718	-1.33915	0.000102391	0.000708455	Afmid
ENSMUSG00000017737	1.1133	4.7e-05	0.000361327	Mmp9
ENSMUSG00000017754	-2.56245	2.46e-28	1.03e-25	Pltp
ENSMUSG00000017756	-1.36331	4.56e-06	4.78e-05	Slc12a7
ENSMUSG00000017831	1.06023	9.71e-09	1.93e-07	Rab5a
ENSMUSG00000017832	1.38287	0.00751891	0.0259301	Hspb9
ENSMUSG00000017969	1.16718	0.00963042	0.0318881	Ptgis
ENSMUSG00000018012	-1.49053	0.00392586	0.0152494	Rac3
ENSMUSG00000018102	-1.2592	7.82e-09	1.59e-07	Hist1h2bc
ENSMUSG00000018168	-1.28634	0.005503	0.0200848	Ikzf3
ENSMUSG00000018169	-1.22289	9.68e-07	1.2e-05	Mfng
ENSMUSG00000018378	-1.04117	0.00299514	0.0121317	Cuedc1
ENSMUSG00000018381	-1.55005	5.49e-19	5.41e-17	Abi3
ENSMUSG00000018411	-1.64756	2.57e-05	0.000215229	Mapt
ENSMUSG00000018459	-1.20472	0.00292643	0.0119146	Slc13a3
ENSMUSG00000018474	-1.45477	1.69e-07	2.57e-06	Chd3
ENSMUSG00000018481	1.09113	3.47e-14	1.9e-12	Appbp2
ENSMUSG00000018500	1.9232	2.29e-27	8.13e-25	Adora2b
ENSMUSG00000018541	-1.30087	1.7e-09	3.99e-08	Cwc25
ENSMUSG00000018604	-2.11912	6.62e-05	0.000489213	Tbx3
ENSMUSG00000018845	-1.49756	0.00670804	0.0237447	Unc45b
ENSMUSG00000018865	-1.91942	0.000600621	0.00317996	Sult4a1
ENSMUSG00000018868	-5.49878	4.07e-07	5.53e-06	Pnpla5
ENSMUSG00000018893	2.3661	5.14e-05	0.000391233	Mb
ENSMUSG00000018919	-2.92575	4.83e-08	8.33e-07	Tm4sf5
ENSMUSG00000018924	-2.89462	6.82e-07	8.8e-06	Alox15
ENSMUSG00000018927	-1.11508	4.14e-06	4.38e-05	Ccl6
ENSMUSG00000018930	1.20725	0.00139768	0.00643149	Ccl4
ENSMUSG00000019080	-1.04272	2.18e-06	2.51e-05	Mfsd3
ENSMUSG00000019256	-1.34013	2.98e-07	4.23e-06	Ahr
ENSMUSG00000019312	-1.33765	0.00373373	0.014619	Grb7
ENSMUSG00000019478	-2.41401	1.32e-05	0.00012179	Rab4a
ENSMUSG00000019528	1.79967	6.37e-23	1.14e-20	Gyg
ENSMUSG00000019564	1.20461	4.93e-08	8.48e-07	Arid3a
ENSMUSG00000019577	-1.82719	0.000216372	0.0013297	Pdk4
ENSMUSG00000019773	-1.0396	0.00367718	0.0144634	Fbxo5
ENSMUSG00000019790	2.25509	2.97e-24	6.81e-22	Stxbp5
ENSMUSG00000019795	1.18653	3.91e-08	6.89e-07	Pcmt1
ENSMUSG00000019796	-1.17006	0.000513941	0.00278965	Lrp11
ENSMUSG00000019817	-2.02791	0.000205638	0.00127447	Plagl1
ENSMUSG00000019828	-2.73264	0.00134275	0.006217	Grm1
ENSMUSG00000019864	-1.53621	7.04e-13	3.16e-11	Rtn4ip1
ENSMUSG00000019874	1.46149	1.26e-05	0.000116868	Fabp7
ENSMUSG00000019883	-1.16086	0.000247936	0.00148919	Echdc1
ENSMUSG00000019986	1.2442	4.87e-12	1.93e-10	Ahi1
ENSMUSG00000019987	2.6902	2.77e-23	5.39e-21	Arg1
ENSMUSG00000019997	1.85761	5.88e-06	5.98e-05	Ctgf
ENSMUSG00000020019	-1.66344	0.000229141	0.00139704	Ntn4
ENSMUSG00000020024	1.15726	1.67e-07	2.55e-06	Cep83
ENSMUSG00000020032	-1.59887	2.1e-08	3.92e-07	Nuak1
ENSMUSG00000020038	1.06361	1.85e-07	2.8e-06	Cry1
ENSMUSG00000020044	1.63155	4.79e-07	6.39e-06	Timp3
ENSMUSG00000020053	-2.96311	2.17e-45	4.4e-42	Igf1
ENSMUSG00000020077	1.18971	4.37e-05	0.000339408	Srgn
ENSMUSG00000020083	1.43617	0.0047163	0.0176768	Fam241b
ENSMUSG00000020092	-2.5198	3.63e-44	6.45e-41	Pald1
ENSMUSG00000020102	-1.80718	3.66e-07	5.04e-06	Slc16a7
ENSMUSG00000020108	2.27229	2.46e-23	4.84e-21	Ddit4
ENSMUSG00000020115	1.06479	7.92e-09	1.6e-07	Tbk1
ENSMUSG00000020122	1.52354	0.00044832	0.00248668	Egfr
ENSMUSG00000020142	-1.91616	0.000111966	0.00076576	Slc1a4
ENSMUSG00000020150	-1.30162	7.48e-07	9.52e-06	Gamt
ENSMUSG00000020151	2.203	0.00467401	0.0175628	Ptprr
ENSMUSG00000020154	-1.4647	0.000107531	0.000737556	Ptprb
ENSMUSG00000020159	-1.3821	0.000697656	0.00359456	Gabrp
ENSMUSG00000020175	-1.55105	0.00387986	0.0151078	Rab36
ENSMUSG00000020185	-1.52069	0.00123128	0.00578386	E2f7
ENSMUSG00000020193	-1.56663	0.00647811	0.0230515	Zpbp
ENSMUSG00000020205	1.43589	7.6e-05	0.000548985	Phlda1
ENSMUSG00000020227	2.04114	6.02e-32	3.29e-29	Irak3
ENSMUSG00000020264	-2.82375	2.26e-10	6.34e-09	Slc36a2
ENSMUSG00000020279	-3.14562	2.77e-05	0.000229625	Il9r
ENSMUSG00000020300	1.12244	8.21e-06	8.02e-05	Cpeb4
ENSMUSG00000020330	-1.09249	0.00100354	0.00485533	Hmmr
ENSMUSG00000020334	1.26275	6.03e-09	1.26e-07	Slc22a4
ENSMUSG00000020357	-1.71099	1.12e-10	3.35e-09	Flt4
ENSMUSG00000020363	1.01222	0.00107326	0.00512803	Gfpt2
ENSMUSG00000020377	-1.69985	6.61e-12	2.58e-10	Ltc4s
ENSMUSG00000020388	-1.96548	1.1e-34	7.79e-32	Pdlim4
ENSMUSG00000020407	2.4168	4.15e-18	3.8e-16	Upp1
ENSMUSG00000020427	1.62812	5.57e-06	5.72e-05	Igfbp3
ENSMUSG00000020484	1.06913	1.03e-14	6.18e-13	Xbp1
ENSMUSG00000020486	-1.5562	6.59e-06	6.6e-05	Septin4
ENSMUSG00000020572	1.03653	1.86e-07	2.8e-06	Nampt
ENSMUSG00000020593	-2.27173	1e-21	1.48e-19	Lpin1
ENSMUSG00000020614	1.13397	0.00105245	0.0050541	Fam20a
ENSMUSG00000020638	1.6578	7.81e-12	2.97e-10	Cmpk2
ENSMUSG00000020641	1.0551	0.00317907	0.0127459	Rsad2
ENSMUSG00000020654	-1.25137	2.51e-07	3.64e-06	Adcy3
ENSMUSG00000020661	-1.37647	3.62e-11	1.21e-09	Dnmt3a
ENSMUSG00000020669	1.24875	0.0101542	0.033304	Sh3yl1
ENSMUSG00000020681	-2.09396	1.63e-22	2.68e-20	Ace
ENSMUSG00000020695	-2.15098	3.6e-08	6.43e-07	Mrc2
ENSMUSG00000020696	1.25545	7.64e-07	9.69e-06	Rffl
ENSMUSG00000020702	-2.77599	0.00784957	0.0269043	Ccl1
ENSMUSG00000020733	1.0141	2.48e-06	2.79e-05	Slc9a3r1
ENSMUSG00000020773	-2.22005	3.16e-17	2.5e-15	Trim47
ENSMUSG00000020787	-1.29848	0.00439639	0.0167114	P2rx1
ENSMUSG00000020808	-1.39623	4.5e-05	0.000348342	Pimreg
ENSMUSG00000020810	1.7069	0.00053429	0.00288026	Cygb
ENSMUSG00000020826	1.73409	1.12e-27	4.44e-25	Nos2
ENSMUSG00000020829	-1.14041	2.23e-05	0.000190288	Slc46a1
ENSMUSG00000020838	-1.16225	0.000650709	0.00340078	Slc6a4
ENSMUSG00000020844	1.16393	3.92e-06	4.21e-05	Nxn
ENSMUSG00000020865	-1.18289	5.33e-06	5.49e-05	Abcc3
ENSMUSG00000020882	-1.95254	4.3e-08	7.51e-07	Cacnb1
ENSMUSG00000020889	-1.04244	0.00050094	0.00273057	Nr1d1
ENSMUSG00000020892	-2.43925	1.88e-05	0.000164629	Aloxe3
ENSMUSG00000020898	-1.47586	2.02e-19	2.2e-17	Ctc1
ENSMUSG00000020900	-1.22908	2.18e-09	5.01e-08	Myh10
ENSMUSG00000020911	-1.8834	1.24e-09	2.99e-08	Krt19
ENSMUSG00000020914	-1.23947	1.17e-06	1.44e-05	Top2a
ENSMUSG00000020926	-4.05495	3.59e-05	0.00028704	Adam11
ENSMUSG00000020928	-2.86522	1.29e-08	2.51e-07	Higd1b
ENSMUSG00000021027	1.11394	5.04e-06	5.23e-05	Ralgapa1
ENSMUSG00000021062	2.51988	3.95e-16	2.84e-14	Rab15
ENSMUSG00000021069	1.01222	0.000123518	0.000830368	Pygl
ENSMUSG00000021071	1.84128	0.000438681	0.00245043	Trim9
ENSMUSG00000021087	-2.5843	6.73e-12	2.61e-10	Rtn1
ENSMUSG00000021091	3.32047	8.8e-14	4.61e-12	Serpina3n
ENSMUSG00000021123	2.0071	0.00044442	0.00247241	Rdh12
ENSMUSG00000021125	1.23805	1.85e-06	2.16e-05	Arg2
ENSMUSG00000021187	-2.11751	2.14e-05	0.000184157	Tc2n
ENSMUSG00000021190	-1.22943	9.21e-10	2.29e-08	Lgmn
ENSMUSG00000021200	-1.96189	1.09e-06	1.34e-05	Asb2
ENSMUSG00000021203	-1.93109	0.000178641	0.00113285	Otub2
ENSMUSG00000021226	-1.05273	0.000156789	0.00101237	Acot2
ENSMUSG00000021256	-2.0628	3.87e-06	4.16e-05	Vash1
ENSMUSG00000021257	-1.11721	0.000868308	0.00430818	Angel1
ENSMUSG00000021265	1.00521	0.00878448	0.0295271	Slc25a29
ENSMUSG00000021278	-1.25597	0.00665979	0.0235919	Amn
ENSMUSG00000021280	-1.212	4.23e-07	5.71e-06	Exoc3l4
ENSMUSG00000021356	-1.57828	4.13e-09	8.91e-08	Irf4
ENSMUSG00000021367	3.68098	3.82e-06	4.11e-05	Edn1
ENSMUSG00000021395	1.19865	4.45e-09	9.52e-08	Spin1
ENSMUSG00000021423	-1.89328	2.72e-19	2.82e-17	Ly86
ENSMUSG00000021486	1.01352	0.000233141	0.0014165	Prelid1
ENSMUSG00000021572	-1.32443	0.000274034	0.00161857	Cep72
ENSMUSG00000021575	-1.56992	0.000681409	0.00352748	Ahrr
ENSMUSG00000021576	1.10311	4.22e-05	0.000329786	Pdcd6
ENSMUSG00000021591	2.00504	1.87e-27	6.95e-25	Glrx
ENSMUSG00000021598	1.37384	4.89e-11	1.56e-09	Med10
ENSMUSG00000021614	1.96458	3.68e-11	1.22e-09	Vcan
ENSMUSG00000021636	-1.89559	1.65e-15	1.1e-13	Marveld2
ENSMUSG00000021638	-1.49302	4.33e-05	0.00033766	Ocln
ENSMUSG00000021640	1.64858	7.31e-09	1.49e-07	Naip1
ENSMUSG00000021643	1.95721	7.03e-12	2.7e-10	Serf1
ENSMUSG00000021646	-1.47002	1.82e-10	5.24e-09	Mccc2
ENSMUSG00000021690	-1.5271	1.26e-08	2.45e-07	Jmy
ENSMUSG00000021699	2.27804	1.21e-16	9.23e-15	Pde4d
ENSMUSG00000021720	-1.73542	8.51e-16	5.9e-14	Rnf180
ENSMUSG00000021759	1.77118	5.13e-23	9.46e-21	Plpp1
ENSMUSG00000021765	2.68409	7e-19	6.86e-17	Fst
ENSMUSG00000021775	-1.469	5.84e-12	2.3e-10	Nr1d2
ENSMUSG00000021796	1.38304	1.78e-13	8.82e-12	Bmpr1a
ENSMUSG00000021830	-1.4333	3.94e-13	1.85e-11	Txndc16
ENSMUSG00000021831	2.01457	3.86e-38	4.25e-35	Ero1l
ENSMUSG00000021846	1.02756	2.11e-08	3.95e-07	Peli2
ENSMUSG00000021866	1.08786	1.31e-09	3.15e-08	Anxa11
ENSMUSG00000021890	1.19025	1.5e-17	1.24e-15	Eaf1
ENSMUSG00000021891	1.06702	8.26e-09	1.66e-07	Mettl6
ENSMUSG00000021895	1.06766	4.63e-06	4.84e-05	Arhgef3
ENSMUSG00000021904	-1.69572	2.49e-05	0.000209408	Sema3g
ENSMUSG00000021928	-1.03506	5.7e-06	5.83e-05	Ebpl
ENSMUSG00000021950	1.41506	3.63e-05	0.000289521	Anxa8
ENSMUSG00000021987	1.0881	1.08e-07	1.71e-06	Mtmr6
ENSMUSG00000021990	1.11087	1.43e-07	2.22e-06	Spata13
ENSMUSG00000021996	1.87484	1.83e-10	5.26e-09	Esd
ENSMUSG00000022024	1.00771	3.62e-07	5e-06	Sugt1
ENSMUSG00000022026	2.44407	4.73e-23	8.84e-21	Olfm4
ENSMUSG00000022033	-1.08095	0.00344886	0.0136847	Pbk
ENSMUSG00000022034	-1.34678	0.00978352	0.0323198	Esco2
ENSMUSG00000022041	-2.10259	1.15e-05	0.000107672	Chrna2
ENSMUSG00000022057	-3.08807	1.33e-08	2.57e-07	Adamdec1
ENSMUSG00000022091	-1.99173	1.72e-32	9.76e-30	Sorbs3
ENSMUSG00000022094	1.27554	1.56e-10	4.54e-09	Slc39a14
ENSMUSG00000022096	-3.36283	5.15e-20	6.31e-18	Hr
ENSMUSG00000022097	-2.59342	1.51e-37	1.53e-34	Sftpc
ENSMUSG00000022103	-2.5317	0.000559914	0.00299344	Gfra2
ENSMUSG00000022146	1.24788	9.47e-05	0.000663795	Osmr
ENSMUSG00000022181	1.36025	0.00423508	0.0161762	C6
ENSMUSG00000022186	-1.02418	1.27e-14	7.56e-13	Oxct1
ENSMUSG00000022205	1.00836	0.00182423	0.00802762	Sub1
ENSMUSG00000022206	-2.27378	0.00420533	0.0161004	Npr3
ENSMUSG00000022218	1.45341	4.25e-15	2.73e-13	Tgm1
ENSMUSG00000022220	-1.40707	5.75e-10	1.49e-08	Adcy4
ENSMUSG00000022235	-1.70624	4.35e-06	4.57e-05	Cmbl
ENSMUSG00000022236	-1.16073	3.93e-05	0.000310822	Ropn1l
ENSMUSG00000022261	-1.50766	1.08e-05	0.000101803	Sdc2
ENSMUSG00000022265	-1.68143	6.36e-07	8.29e-06	Ank
ENSMUSG00000022280	1.25945	3.98e-06	4.25e-05	Rnf19a
ENSMUSG00000022324	-2.90408	2.75e-14	1.56e-12	Matn2
ENSMUSG00000022353	-1.03933	5.97e-08	1.01e-06	Mtss1
ENSMUSG00000022364	-1.3901	2.95e-07	4.19e-06	Tbc1d31
ENSMUSG00000022371	-2.56425	1.46e-11	5.2e-10	Col14a1
ENSMUSG00000022415	-1.08801	9.64e-09	1.92e-07	Syngr1
ENSMUSG00000022419	-1.0171	0.00197701	0.00858557	Deptor
ENSMUSG00000022425	-1.61863	4.26e-06	4.5e-05	Enpp2
ENSMUSG00000022456	-1.85859	0.000639736	0.00335765	2021-09-03
ENSMUSG00000022468	-2.26642	2.38e-05	0.000201513	Endou
ENSMUSG00000022469	-1.68178	5.3e-08	9.04e-07	Rapgef3
ENSMUSG00000022504	-1.42769	6.69e-08	1.11e-06	Ciita
ENSMUSG00000022512	2.58559	2.36e-23	4.73e-21	Cldn1
ENSMUSG00000022514	1.39013	1.92e-10	5.47e-09	Il1rap
ENSMUSG00000022526	-1.09321	0.000812158	0.0040809	Zfp251
ENSMUSG00000022537	-1.49351	0.0133975	0.0417167	Tmem44
ENSMUSG00000022546	-1.21227	0.00124215	0.00582721	Gpt
ENSMUSG00000022548	1.57841	0.00378394	0.014783	Apod
ENSMUSG00000022550	-1.18948	5.33e-07	7.04e-06	Adck5
ENSMUSG00000022564	1.17165	4.38e-10	1.18e-08	Grina
ENSMUSG00000022574	-1.71404	2.34e-08	4.32e-07	Naprt
ENSMUSG00000022582	3.2242	8.5e-06	8.26e-05	Ly6g
ENSMUSG00000022584	2.37322	1.37e-17	1.15e-15	Ly6c2
ENSMUSG00000022651	2.6575	0.00285915	0.0116842	Retnlg
ENSMUSG00000022657	-1.42289	0.000454314	0.00251796	Cd96
ENSMUSG00000022659	-2.62722	0.000200035	0.00124572	Gcsam
ENSMUSG00000022665	-1.59926	3.34e-23	6.32e-21	Ccdc80
ENSMUSG00000022701	-1.02016	8.95e-05	0.000632223	Ccdc191
ENSMUSG00000022707	1.17275	3.83e-13	1.8e-11	Gbe1
ENSMUSG00000022744	1.13767	2.15e-09	4.96e-08	Cldnd1
ENSMUSG00000022765	1.00048	2.33e-13	1.13e-11	Snap29
ENSMUSG00000022793	-1.4186	7.39e-06	7.29e-05	B4galt4
ENSMUSG00000022797	1.5316	8.92e-12	3.34e-10	Tfrc
ENSMUSG00000022816	1.74397	1.37e-09	3.28e-08	Fstl1
ENSMUSG00000022817	-2.20968	1.55e-28	7.09e-26	Itgb5
ENSMUSG00000022818	-1.21253	0.000684131	0.003539	Cyp2ab1
ENSMUSG00000022836	-1.11543	2.16e-05	0.000185826	Mylk
ENSMUSG00000022863	1.08609	0.000127906	0.000853579	Btg3
ENSMUSG00000022867	1.0582	1.23e-11	4.43e-10	Usp25
ENSMUSG00000022868	7.09143	0.00214466	0.00919278	Ahsg
ENSMUSG00000022871	2.46883	0.0122535	0.0389137	Fetub
ENSMUSG00000022875	6.76213	0.00165654	0.00742774	Kng1
ENSMUSG00000022876	1.913	1.4e-10	4.1e-09	Samsn1
ENSMUSG00000022877	8.86284	0.00884311	0.0296966	Hrg
ENSMUSG00000022902	4.02602	0.00817205	0.0277979	Stfa2
ENSMUSG00000022912	-1.351	4.23e-13	1.98e-11	Pros1
ENSMUSG00000022941	-1.3491	0.00607929	0.021879	Ripply3
ENSMUSG00000022947	-1.6552	5.72e-10	1.49e-08	Cbr3
ENSMUSG00000022994	-1.11097	0.0137552	0.0426157	Adcy6
ENSMUSG00000023007	-1.60342	1.17e-09	2.84e-08	Prpf40b
ENSMUSG00000023019	-1.17178	0.00421597	0.0161206	Gpd1
ENSMUSG00000023022	-1.51948	1.29e-13	6.56e-12	Lima1
ENSMUSG00000023043	1.28888	2.43e-06	2.75e-05	Krt18
ENSMUSG00000023044	-1.02485	7.8e-05	0.000560889	Csad
ENSMUSG00000023048	1.0961	7.05e-06	6.99e-05	Prr13
ENSMUSG00000023087	1.78335	1.24e-16	9.36e-15	Noct
ENSMUSG00000023150	-1.19923	6.15e-13	2.77e-11	Ivns1abp
ENSMUSG00000023191	-2.20966	1.39e-15	9.43e-14	P3h3
ENSMUSG00000023206	1.86944	2.59e-24	6.04e-22	Il15ra
ENSMUSG00000023224	1.02345	5.79e-08	9.79e-07	Serping1
ENSMUSG00000023243	-1.32841	8.04e-06	7.87e-05	Kcnk5
ENSMUSG00000023274	-1.16629	5.92e-05	0.000443568	Cd4
ENSMUSG00000023336	-2.23662	0.000103174	0.000712486	Wfdc1
ENSMUSG00000023473	1.28214	2.39e-12	1e-10	Celsr3
ENSMUSG00000023484	-2.4101	0.00828971	0.028124	Prph
ENSMUSG00000023809	1.89104	7.79e-36	6.51e-33	Rps6ka2
ENSMUSG00000023885	-3.95175	0.000338	0.00195016	Thbs2
ENSMUSG00000023902	-3.22447	3.09e-05	0.000251759	Zscan10
ENSMUSG00000023903	2.05949	6.27e-20	7.42e-18	Mmp25
ENSMUSG00000023913	1.40501	3.9e-07	5.33e-06	Pla2g7
ENSMUSG00000023915	-1.02882	1.42e-09	3.38e-08	Tnfrsf21
ENSMUSG00000023942	-1.14398	4.86e-11	1.56e-09	Slc29a1
ENSMUSG00000023951	-1.55782	5.16e-08	8.83e-07	Vegfa
ENSMUSG00000023982	-1.34159	3.36e-10	9.19e-09	Guca1a
ENSMUSG00000023992	-1.52074	2.79e-13	1.34e-11	Trem2
ENSMUSG00000024008	-4.03277	7.08e-12	2.71e-10	Cpne5
ENSMUSG00000024013	-1.59335	1.82e-10	5.25e-09	Fgd2
ENSMUSG00000024028	-5.5742	3.93e-06	4.21e-05	Tff2
ENSMUSG00000024030	-1.00044	3.69e-07	5.08e-06	Abcg1
ENSMUSG00000024044	-2.38568	4.3e-13	2e-11	Epb41l3
ENSMUSG00000024065	-1.17468	0.00995363	0.0327902	Ehd3
ENSMUSG00000024070	1.02934	0.000142188	0.000932896	Prkd3
ENSMUSG00000024074	-1.18634	1.33e-05	0.000122126	Crim1
ENSMUSG00000024079	1.3753	5.63e-10	1.47e-08	Eif2ak2
ENSMUSG00000024087	1.57834	0.000445156	0.00247493	Cyp1b1
ENSMUSG00000024124	-1.7344	9.55e-05	0.000667211	Prss30
ENSMUSG00000024140	-1.23125	3.76e-07	5.16e-06	Epas1
ENSMUSG00000024168	-1.2023	0.000624475	0.00329031	Tmem204
ENSMUSG00000024210	-3.73663	4.97e-17	3.9e-15	Ip6k3
ENSMUSG00000024222	1.99237	1.66e-07	2.53e-06	Fkbp5
ENSMUSG00000024235	1.20173	3.68e-11	1.22e-09	Map3k8
ENSMUSG00000024245	1.55191	5.45e-08	9.26e-07	Tmem178
ENSMUSG00000024268	-1.1988	0.00644836	0.0229686	Celf4
ENSMUSG00000024301	-1.14856	8.1e-05	0.000579738	Kifc5b
ENSMUSG00000024330	-1.10325	0.000223378	0.00136653	Col11a2
ENSMUSG00000024340	-1.65275	2.76e-05	0.000229128	Btnl2
ENSMUSG00000024347	-2.54304	0.00146927	0.00671741	Psd2
ENSMUSG00000024397	-1.1758	1.61e-11	5.74e-10	Aif1
ENSMUSG00000024399	-1.29186	5.37e-15	3.37e-13	Ltb
ENSMUSG00000024404	1.05966	1.02e-05	9.71e-05	Riok3
ENSMUSG00000024424	1.51963	1.11e-12	4.85e-11	Ttc39c
ENSMUSG00000024513	1.42379	1.88e-10	5.37e-09	Mbd2
ENSMUSG00000024529	2.86419	7.32e-14	3.86e-12	Lox
ENSMUSG00000024544	-1.34025	1.69e-06	2e-05	Ldlrad4
ENSMUSG00000024597	-1.97376	2.61e-15	1.7e-13	Slc12a2
ENSMUSG00000024610	-1.19191	1.58e-13	7.85e-12	Cd74
ENSMUSG00000024620	-1.05127	0.000371505	0.00211937	Pdgfrb
ENSMUSG00000024659	1.39468	1e-06	1.24e-05	Anxa1
ENSMUSG00000024661	1.17617	1.6e-06	1.91e-05	Fth1
ENSMUSG00000024663	-2.20576	1.1e-14	6.61e-13	Rab3il1
ENSMUSG00000024665	-1.91425	4.88e-11	1.56e-09	Fads2
ENSMUSG00000024675	2.0065	8.25e-18	7.19e-16	Ms4a4c
ENSMUSG00000024725	1.11129	1.42e-06	1.71e-05	Ostf1
ENSMUSG00000024730	1.57371	2.55e-16	1.86e-14	Ms4a8a
ENSMUSG00000024732	1.20186	1.01e-08	1.99e-07	Ccdc86
ENSMUSG00000024754	1.16903	3.16e-08	5.71e-07	Tmem2
ENSMUSG00000024768	-2.47734	3.36e-06	3.65e-05	Lipf
ENSMUSG00000024769	-1.52399	1.29e-07	2.01e-06	Cdc42bpg
ENSMUSG00000024774	2.2923	4.37e-08	7.62e-07	Ankrd22
ENSMUSG00000024778	1.61019	7.46e-11	2.3e-09	Fas
ENSMUSG00000024799	-1.52841	1.18e-06	1.44e-05	Tm7sf2
ENSMUSG00000024803	1.60391	0.00179036	0.0078957	Ankrd1
ENSMUSG00000024842	-2.44172	6.47e-05	0.000479092	Cabp4
ENSMUSG00000024887	-1.27785	1.82e-05	0.000160689	Asah2
ENSMUSG00000024899	-1.1053	0.00010183	0.000705606	Papss2
ENSMUSG00000024907	-1.98725	3.34e-06	3.64e-05	Gal
ENSMUSG00000024910	-1.21889	0.000687431	0.0035509	Ctsw
ENSMUSG00000024912	2.42394	2.27e-19	2.42e-17	Fosl1
ENSMUSG00000024940	-1.38112	4.35e-11	1.41e-09	Ltbp3
ENSMUSG00000024953	1.36312	1.74e-06	2.05e-05	Prdx5
ENSMUSG00000025007	-1.05105	5.43e-05	0.000410912	Aldh18a1
ENSMUSG00000025008	-1.01354	7.03e-07	9.01e-06	Tctn3
ENSMUSG00000025019	1.1753	3.42e-09	7.53e-08	Lcor
ENSMUSG00000025059	1.24055	2.15e-07	3.21e-06	Gk
ENSMUSG00000025069	-1.69254	0.00622383	0.0223144	Gsto2
ENSMUSG00000025092	-1.34575	2.02e-05	0.000175448	Hspa12a
ENSMUSG00000025150	-1.03583	0.000379708	0.00216183	Cbr2
ENSMUSG00000025153	-1.51073	0.000316999	0.00184246	Fasn
ENSMUSG00000025163	-1.60209	0.000575194	0.00306361	Cd7
ENSMUSG00000025165	-1.16728	1.69e-05	0.000150574	Sectm1a
ENSMUSG00000025171	1.40952	8.27e-11	2.52e-09	Ubtd1
ENSMUSG00000025232	-1.46918	5.64e-18	5.14e-16	Hexa
ENSMUSG00000025236	2.17724	1.24e-18	1.2e-16	Adpgk
ENSMUSG00000025278	-1.04886	0.00609814	0.0219357	Flnb
ENSMUSG00000025279	-2.16411	5.24e-25	1.3e-22	Dnase1l3
ENSMUSG00000025318	2.18414	5.88e-06	5.98e-05	Jph3
ENSMUSG00000025321	2.13737	2.78e-05	0.000230421	Itgb8
ENSMUSG00000025330	1.42655	9.55e-06	9.17e-05	Padi4
ENSMUSG00000025366	-1.06174	4.06e-06	4.31e-05	Esyt1
ENSMUSG00000025422	-1.29306	5.2e-10	1.37e-08	Agap2
ENSMUSG00000025432	-1.9713	0.0016744	0.00748474	Avil
ENSMUSG00000025453	-2.18139	2.01e-21	2.95e-19	Nnt
ENSMUSG00000025461	-5.24553	2e-25	5.15e-23	Cd163l1
ENSMUSG00000025473	1.07883	6.92e-08	1.14e-06	Adam8
ENSMUSG00000025477	1.16347	1.16e-08	2.27e-07	Inpp5a
ENSMUSG00000025479	3.70703	3.41e-07	4.75e-06	Cyp2e1
ENSMUSG00000025489	-1.54596	3.89e-05	0.000307975	Ifitm5
ENSMUSG00000025491	1.68506	1.31e-07	2.05e-06	Ifitm1
ENSMUSG00000025492	2.12258	6.96e-20	7.98e-18	Ifitm3
ENSMUSG00000025498	1.64182	1.18e-17	1.01e-15	Irf7
ENSMUSG00000025534	-1.02304	1.08e-11	3.94e-10	Gusb
ENSMUSG00000025586	-1.58086	0.000249131	0.00149447	Cpeb1
ENSMUSG00000025742	-1.14212	1.47e-07	2.27e-06	Prps2
ENSMUSG00000025764	-1.07081	3.97e-07	5.41e-06	Jade1
ENSMUSG00000025766	-1.1457	0.00348245	0.0138064	D3Ertd751e
ENSMUSG00000025810	-1.43674	2.53e-10	7.03e-09	Nrp1
ENSMUSG00000025855	-2.98476	2.12e-21	3.07e-19	Prkar1b
ENSMUSG00000025856	-1.68196	1.02e-16	7.89e-15	Pdgfa
ENSMUSG00000025876	-1.21095	3.39e-05	0.000272726	Unc5a
ENSMUSG00000025902	-1.53018	0.00711699	0.0248456	Sox17
ENSMUSG00000025916	1.64394	0.00969896	0.0320927	Ppp1r42
ENSMUSG00000025929	-6.67202	4.69e-11	1.51e-09	Il17a
ENSMUSG00000025931	-1.6608	0.00192473	0.00838161	Paqr8
ENSMUSG00000025933	-1.65662	0.000684959	0.00354195	Tmem14a
ENSMUSG00000025978	-1.01737	0.0128036	0.0403091	Rftn2
ENSMUSG00000025986	-1.15137	0.000559663	0.00299323	Slc39a10
ENSMUSG00000025997	-2.19294	1.69e-05	0.000150574	Ikzf2
ENSMUSG00000026004	1.40154	4.48e-08	7.79e-07	Kansl1l
ENSMUSG00000026028	1.21283	1.28e-11	4.59e-10	Trak2
ENSMUSG00000026047	-1.11186	2.33e-07	3.44e-06	Kdelc1
ENSMUSG00000026062	-1.18044	0.00656534	0.0233151	Slc9a2
ENSMUSG00000026068	1.08902	7.86e-07	9.94e-06	Il18rap
ENSMUSG00000026070	1.08262	1.53e-05	0.000137165	Il18r1
ENSMUSG00000026080	-2.21549	0.000192668	0.00120726	Chst10
ENSMUSG00000026088	1.28834	5.82e-15	3.64e-13	Mitd1
ENSMUSG00000026095	1.08834	0.000310447	0.00181049	Asnsd1
ENSMUSG00000026102	1.02305	3.11e-07	4.38e-06	Inpp1
ENSMUSG00000026121	-1.1081	1.53e-06	1.82e-05	Sema4c
ENSMUSG00000026156	1.64892	7.14e-06	7.06e-05	B3gat2
ENSMUSG00000026170	-1.72399	7.11e-10	1.8e-08	Cyp27a1
ENSMUSG00000026180	1.42697	5.02e-06	5.21e-05	Cxcr2
ENSMUSG00000026196	-1.24249	0.0099941	0.0329006	Bard1
ENSMUSG00000026204	-1.54787	6.9e-05	0.000505817	Ptprn
ENSMUSG00000026220	-2.10136	3.75e-06	4.04e-05	Slc16a14
ENSMUSG00000026222	1.14209	4.71e-09	9.99e-08	Sp100
ENSMUSG00000026235	-2.54655	6.75e-07	8.73e-06	Epha4
ENSMUSG00000026249	2.57753	2.07e-19	2.24e-17	Serpine2
ENSMUSG00000026279	1.05206	3.35e-10	9.19e-09	Thap4
ENSMUSG00000026303	-1.19833	0.00685025	0.0241159	Mlph
ENSMUSG00000026341	1.01846	3.8e-07	5.21e-06	Actr3
ENSMUSG00000026357	1.33614	7.44e-05	0.000538424	Rgs18
ENSMUSG00000026360	-1.15922	4.19e-09	9.01e-08	Rgs2
ENSMUSG00000026389	-1.41426	0.000569073	0.00303669	Steap3
ENSMUSG00000026417	-1.4138	3.18e-07	4.47e-06	Pigr
ENSMUSG00000026437	1.84872	2.55e-12	1.07e-10	Cdk18
ENSMUSG00000026458	-3.03023	1.42e-39	1.83e-36	Ppfia4
ENSMUSG00000026475	-1.33523	1.19e-06	1.45e-05	Rgs16
ENSMUSG00000026479	1.13411	4.23e-05	0.000330667	Lamc2
ENSMUSG00000026489	-1.54375	1.12e-09	2.71e-08	Coq8a
ENSMUSG00000026496	-1.02567	8.6e-05	0.000609271	Parp1
ENSMUSG00000026536	1.65672	2.82e-22	4.51e-20	Mnda
ENSMUSG00000026548	-1.40209	3.83e-14	2.08e-12	Slamf9
ENSMUSG00000026573	-1.85863	3.36e-05	0.000270255	Xcl1
ENSMUSG00000026574	-1.61084	8.73e-07	1.09e-05	Dpt
ENSMUSG00000026581	1.20672	1.23e-06	1.5e-05	Sell
ENSMUSG00000026582	-1.8642	1.49e-06	1.78e-05	Sele
ENSMUSG00000026605	-1.20441	0.00388515	0.0151243	Cenpf
ENSMUSG00000026616	-1.8064	0.000400788	0.00226369	Cr2
ENSMUSG00000026659	-1.30987	8.91e-05	0.00063001	Dusp12
ENSMUSG00000026701	1.42814	7.69e-10	1.93e-08	Prdx6
ENSMUSG00000026709	-1.02055	0.000184982	0.00116873	Dars2
ENSMUSG00000026712	-2.14821	3.28e-18	3.03e-16	Mrc1
ENSMUSG00000026768	-2.15859	0.00014041	0.000922421	Itga8
ENSMUSG00000026773	1.21636	2.03e-11	7.12e-10	Pfkfb3
ENSMUSG00000026785	-1.0108	0.00165977	0.00743089	Pkn3
ENSMUSG00000026807	-1.4964	0.000213736	0.00131661	Ak8
ENSMUSG00000026809	-1.31136	8.95e-06	8.65e-05	Spaca9
ENSMUSG00000026814	-1.57316	3.62e-10	9.87e-09	Eng
ENSMUSG00000026822	3.24353	5.22e-06	5.39e-05	Lcn2
ENSMUSG00000026826	-1.38236	2.07e-05	0.000179044	Nr4a2
ENSMUSG00000026830	1.63072	0.00255682	0.0106541	Ermn
ENSMUSG00000026874	-1.27715	0.000818287	0.00410299	Hc
ENSMUSG00000026875	1.20482	1.03e-05	9.77e-05	Traf1
ENSMUSG00000026896	1.13232	3.54e-07	4.9e-06	Ifih1
ENSMUSG00000026932	-1.12483	1.97e-05	0.000171379	Nacc2
ENSMUSG00000026939	-1.13748	3.11e-05	0.000252608	Tmem141
ENSMUSG00000026944	-1.20199	0.000404718	0.00228408	Abca2
ENSMUSG00000026946	1.0887	1.99e-06	2.31e-05	Nmi
ENSMUSG00000026958	-1.22597	1.69e-12	7.29e-11	Dpp7
ENSMUSG00000026984	2.97631	7.63e-12	2.91e-10	Il1f6
ENSMUSG00000026986	-1.59529	0.000358817	0.00205607	Hnmt
ENSMUSG00000027068	1.80571	8.32e-14	4.37e-12	Dhrs9
ENSMUSG00000027070	-1.82213	0.000669203	0.00347696	Lrp2
ENSMUSG00000027078	1.07392	7.01e-08	1.15e-06	Ube2l6
ENSMUSG00000027164	1.03902	1.79e-13	8.82e-12	Traf6
ENSMUSG00000027199	-1.51818	3.2e-09	7.07e-08	Gatm
ENSMUSG00000027200	-1.40966	1.8e-05	0.000158827	Sema6d
ENSMUSG00000027217	-1.6431	0.000760759	0.00386501	Tspan18
ENSMUSG00000027219	1.50468	6.61e-21	8.94e-19	Slc28a2
ENSMUSG00000027221	-1.86133	5.88e-14	3.11e-12	Chst1
ENSMUSG00000027239	1.24221	4.04e-05	0.000318418	Mdk
ENSMUSG00000027249	5.96239	0.00359752	0.0142031	F2
ENSMUSG00000027254	-1.88321	0.00988774	0.0326261	Map1a
ENSMUSG00000027257	2.15183	2.51e-07	3.64e-06	Pacsin3
ENSMUSG00000027314	-1.01221	0.00293537	0.0119304	Dll4
ENSMUSG00000027318	-1.05253	0.0153881	0.0466571	Adam33
ENSMUSG00000027333	1.23162	1.3e-05	0.000120032	Smox
ENSMUSG00000027377	2.03909	5.23e-05	0.000396877	Mall
ENSMUSG00000027399	1.48548	7.99e-05	0.000573313	Il1a
ENSMUSG00000027401	-2.40153	3.59e-06	3.88e-05	Tgm3
ENSMUSG00000027408	1.10311	0.00578531	0.0209377	Cpxm1
ENSMUSG00000027420	-1.20778	0.012766	0.0402176	Bfsp1
ENSMUSG00000027430	-1.1004	4.56e-07	6.11e-06	Dtd1
ENSMUSG00000027452	-1.66797	7.88e-10	1.96e-08	Acss1
ENSMUSG00000027487	-1.21206	0.00245053	0.0102714	Cdk5rap1
ENSMUSG00000027514	1.11619	8.2e-10	2.04e-08	Zbp1
ENSMUSG00000027533	-1.56575	4.94e-16	3.54e-14	Fabp5
ENSMUSG00000027544	-1.54102	1.36e-05	0.000124772	Nfatc2
ENSMUSG00000027562	-2.23916	1.9e-10	5.43e-09	Car2
ENSMUSG00000027580	1.13849	0.0012083	0.00569473	Helz2
ENSMUSG00000027637	1.15718	9.39e-10	2.33e-08	1110008F13Rik
ENSMUSG00000027669	-1.28733	8.07e-06	7.9e-05	Gnb4
ENSMUSG00000027670	1.2882	1.44e-05	0.000130751	Ocstamp
ENSMUSG00000027692	-1.30757	0.000953278	0.00464858	Tnik
ENSMUSG00000027699	-1.0135	0.0043305	0.0164919	Ect2
ENSMUSG00000027750	-1.31422	1.15e-06	1.41e-05	Postn
ENSMUSG00000027776	2.8783	1.5e-25	3.94e-23	Il12a
ENSMUSG00000027784	-1.16766	0.00066076	0.00344318	Ppm1l
ENSMUSG00000027820	-1.96788	0.000216293	0.0013297	Mme
ENSMUSG00000027832	2.81309	1.19e-10	3.53e-09	Ptx3
ENSMUSG00000027834	1.08783	0.0074128	0.0256576	Serpini1
ENSMUSG00000027835	1.16291	1.33e-11	4.78e-10	Pdcd10
ENSMUSG00000027848	-3.36547	3.67e-30	1.74e-27	Olfml3
ENSMUSG00000027858	-1.62623	1.99e-08	3.74e-07	Tspan2
ENSMUSG00000027863	-1.61031	6.28e-08	1.05e-06	Cd2
ENSMUSG00000027882	1.2531	8.54e-15	5.23e-13	Stxbp3
ENSMUSG00000027907	1.40796	9.42e-11	2.86e-09	S100a11
ENSMUSG00000027956	-2.66035	7.13e-08	1.17e-06	Tmem144
ENSMUSG00000027962	-1.38379	0.000544794	0.00292582	Vcam1
ENSMUSG00000027981	1.06364	7.62e-10	1.91e-08	Rnpc3
ENSMUSG00000028001	8.09699	0.000218068	0.00133866	Fga
ENSMUSG00000028019	-2.54863	3.95e-36	3.51e-33	Pdgfc
ENSMUSG00000028024	-1.71522	0.000213564	0.00131613	Enpep
ENSMUSG00000028047	-1.24589	1.87e-05	0.000164437	Thbs3
ENSMUSG00000028068	-1.11415	0.000242921	0.00146526	Iqgap3
ENSMUSG00000028071	-1.08512	0.00186333	0.00817438	Sh2d2a
ENSMUSG00000028082	-1.07251	0.000765193	0.00388338	Sh3d19
ENSMUSG00000028100	-1.79688	0.00583432	0.0210935	Nudt17
ENSMUSG00000028108	1.67292	6.46e-20	7.59e-18	Ecm1
ENSMUSG00000028111	1.47595	3.34e-09	7.35e-08	Ctsk
ENSMUSG00000028121	-1.57073	9.82e-11	2.97e-09	Bcar3
ENSMUSG00000028124	1.83365	1.64e-22	2.68e-20	Gclm
ENSMUSG00000028128	1.78235	3.83e-09	8.29e-08	F3
ENSMUSG00000028159	1.28685	2.4e-09	5.43e-08	Dapp1
ENSMUSG00000028164	-1.06031	1.19e-07	1.87e-06	Manba
ENSMUSG00000028191	1.13505	2.99e-07	4.24e-06	Bcl10
ENSMUSG00000028255	-1.43368	0.0100917	0.0331297	Clca1
ENSMUSG00000028270	1.13183	3.66e-10	9.92e-09	Gbp2
ENSMUSG00000028300	1.06421	1.58e-10	4.59e-09	3110043O21Rik
ENSMUSG00000028339	-2.34857	1.52e-13	7.64e-12	Col15a1
ENSMUSG00000028356	2.39708	4.75e-05	0.000364709	Ambp
ENSMUSG00000028364	-1.55967	2.74e-05	0.000227267	Tnc
ENSMUSG00000028378	1.15561	1.28e-07	2e-06	Ptgr1
ENSMUSG00000028420	1.36567	4.86e-11	1.56e-09	Tmem38b
ENSMUSG00000028435	-2.39184	0.00104301	0.00501896	Aqp3
ENSMUSG00000028437	1.29298	6.61e-12	2.58e-10	Ubap1
ENSMUSG00000028459	-2.79056	9.62e-51	4.56e-47	Cd72
ENSMUSG00000028460	-1.42027	0.00399428	0.0154517	Sit1
ENSMUSG00000028480	1.53741	1.05e-06	1.3e-05	Glipr2
ENSMUSG00000028538	-1.23222	3.05e-07	4.31e-06	St3gal3
ENSMUSG00000028551	-1.04757	2.23e-07	3.31e-06	Cdkn2c
ENSMUSG00000028645	1.03512	1.28e-10	3.79e-09	Slc2a1
ENSMUSG00000028680	1.05706	1.26e-08	2.46e-07	Plk3
ENSMUSG00000028681	-1.76802	8e-05	0.000573416	Ptch2
ENSMUSG00000028689	-1.00013	0.000756591	0.00384659	Ccdc163
ENSMUSG00000028717	-2.76023	6.16e-05	0.000458003	Tal1
ENSMUSG00000028743	-1.05523	0.000819643	0.00410689	Akr7a5
ENSMUSG00000028776	2.05531	1.07e-09	2.63e-08	Tinagl1
ENSMUSG00000028803	-1.15946	5.19e-09	1.09e-07	Nipal3
ENSMUSG00000028843	1.02197	5.4e-08	9.2e-07	Sh3bgrl3
ENSMUSG00000028862	1.30536	7.6e-08	1.24e-06	Map3k6
ENSMUSG00000028864	-1.54461	2.29e-09	5.22e-08	Hgf
ENSMUSG00000028871	-1.04117	0.00785064	0.0269043	Rspo1
ENSMUSG00000028909	-2.10283	0.000190311	0.00119565	Ptpru
ENSMUSG00000028943	-1.44969	1.04e-05	9.82e-05	Espn
ENSMUSG00000028944	-1.04462	1.41e-08	2.72e-07	Prkag2
ENSMUSG00000028957	-1.08429	0.0161031	0.0484014	Per3
ENSMUSG00000028965	1.16326	4.62e-10	1.23e-08	Tnfrsf9
ENSMUSG00000028970	-1.08044	8.58e-05	0.000608746	Abcb1b
ENSMUSG00000028982	-1.10242	4.05e-05	0.000318727	Slc25a33
ENSMUSG00000028988	1.23742	0.000101893	0.000705699	Ctnnbip1
ENSMUSG00000029049	-1.00374	0.00864306	0.0291142	Morn1
ENSMUSG00000029053	-1.10936	0.00366277	0.0144183	Prkcz
ENSMUSG00000029059	-1.87248	2.98e-14	1.66e-12	Fam213b
ENSMUSG00000029084	1.72642	4.09e-20	5.05e-18	Cd38
ENSMUSG00000029094	-1.37466	1.78e-11	6.27e-10	Afap1
ENSMUSG00000029120	-1.68135	0.00699235	0.0245008	Ppp2r2c
ENSMUSG00000029161	1.15262	0.0157347	0.0475455	Cgref1
ENSMUSG00000029171	1.07488	1.1e-09	2.69e-08	Pgm1
ENSMUSG00000029204	1.29921	5.65e-13	2.59e-11	Rhoh
ENSMUSG00000029207	-1.3696	4.54e-06	4.77e-05	Apbb2
ENSMUSG00000029229	1.65041	7.72e-08	1.25e-06	Chic2
ENSMUSG00000029299	-2.67909	0.000150548	0.000980079	Abcg3
ENSMUSG00000029309	-1.12823	9.27e-07	1.16e-05	Sparcl1
ENSMUSG00000029312	-1.38687	2.71e-07	3.89e-06	Klhl8
ENSMUSG00000029314	1.37028	1.58e-07	2.42e-06	Gpat3
ENSMUSG00000029321	1.45667	0.00291594	0.011892	Slc10a6
ENSMUSG00000029322	2.28957	4.73e-05	0.0003636	Plac8
ENSMUSG00000029338	1.06963	7.75e-05	0.000558004	Antxr2
ENSMUSG00000029345	-1.01577	4.53e-10	1.21e-08	Tfip11
ENSMUSG00000029368	6.61015	0.000205606	0.00127447	Alb
ENSMUSG00000029379	3.13649	4.08e-08	7.15e-07	Cxcl3
ENSMUSG00000029380	-1.52193	0.00032628	0.00189099	Cxcl1
ENSMUSG00000029385	1.11615	0.000139675	0.000918985	Ccng2
ENSMUSG00000029516	-1.41342	8.17e-06	7.99e-05	Cit
ENSMUSG00000029521	-1.48629	8.35e-06	8.14e-05	Chek2
ENSMUSG00000029552	1.43796	5.68e-09	1.19e-07	Tes
ENSMUSG00000029581	-1.99321	5.68e-16	4.03e-14	Fscn1
ENSMUSG00000029605	1.16075	4.84e-06	5.05e-05	Oas1b
ENSMUSG00000029664	-1.73305	0.0146071	0.0447186	Tfpi2
ENSMUSG00000029672	-1.10792	3.09e-14	1.71e-12	Fam3c
ENSMUSG00000029699	1.12394	0.000888888	0.00438882	Ssc4d
ENSMUSG00000029723	1.00422	3.2e-08	5.76e-07	Tsc22d4
ENSMUSG00000029752	1.45889	3.03e-08	5.49e-07	Asns
ENSMUSG00000029763	-1.00329	0.000380533	0.00216479	Exoc4
ENSMUSG00000029780	1.75823	2.1e-10	5.97e-09	Nt5c3
ENSMUSG00000029798	1.53789	5.5e-13	2.53e-11	Herc6
ENSMUSG00000029860	1.19583	2.81e-16	2.04e-14	Zyx
ENSMUSG00000029919	-1.76696	6.46e-17	5.01e-15	Hpgds
ENSMUSG00000029925	-1.22286	1.19e-22	2.08e-20	Tbxas1
ENSMUSG00000030017	1.27061	0.00247723	0.010365	Reg3g
ENSMUSG00000030029	-2.25511	1.42e-09	3.37e-08	Lrig1
ENSMUSG00000030041	-1.328	0.000629959	0.00331551	M1ap
ENSMUSG00000030064	-1.06982	0.000156584	0.00101195	Frmd4b
ENSMUSG00000030069	2.6489	9.49e-09	1.89e-07	Prok2
ENSMUSG00000030077	1.97616	0.00265851	0.01101	Chl1
ENSMUSG00000030088	-1.17412	4.63e-10	1.23e-08	Aldh1l1
ENSMUSG00000030091	-1.26454	1.09e-07	1.71e-06	Nup210
ENSMUSG00000030107	1.44276	2.5e-22	4.04e-20	Usp18
ENSMUSG00000030108	1.25026	1.4e-05	0.000127159	Slc6a13
ENSMUSG00000030109	1.51575	4.77e-09	1.01e-07	Slc6a12
ENSMUSG00000030114	-1.58399	0.000460084	0.00254597	Klrg1
ENSMUSG00000030125	-1.45271	0.0141151	0.0434934	Lrrc23
ENSMUSG00000030134	-1.62769	0.0011278	0.00535801	Rasgef1a
ENSMUSG00000030137	1.7069	1.05e-07	1.66e-06	Tuba8
ENSMUSG00000030142	1.19601	3.18e-06	3.48e-05	Clec4e
ENSMUSG00000030144	1.20709	1.38e-05	0.000126275	Clec4d
ENSMUSG00000030147	-1.56287	0.00128925	0.00601833	Clec4b1
ENSMUSG00000030148	1.37565	6.74e-09	1.39e-07	Clec4a2
ENSMUSG00000030156	1.1927	2.2e-06	2.52e-05	Cd69
ENSMUSG00000030158	-2.20751	0.000498807	0.00272417	Clec12b
ENSMUSG00000030159	-1.38	6.5e-05	0.000481484	Clec1b
ENSMUSG00000030162	1.12362	0.000919711	0.00450966	Olr1
ENSMUSG00000030200	-1.67003	5.12e-08	8.77e-07	Bcl2l14
ENSMUSG00000030207	-1.37657	6.96e-10	1.77e-08	Fam234b
ENSMUSG00000030208	1.0129	6.98e-06	6.93e-05	Emp1
ENSMUSG00000030246	-1.65573	3.71e-15	2.4e-13	Ldhb
ENSMUSG00000030272	-1.80159	8.22e-22	1.23e-19	Camk1
ENSMUSG00000030278	-3.0723	4.22e-26	1.27e-23	Cidec
ENSMUSG00000030282	1.12526	1.8e-05	0.000159245	Cmas
ENSMUSG00000030283	1.36485	3.51e-06	3.8e-05	St8sia1
ENSMUSG00000030301	-1.14318	1.1e-06	1.35e-05	Ccdc91
ENSMUSG00000030323	-1.14594	7.2e-05	0.000522934	Ift122
ENSMUSG00000030329	-1.60802	0.000128591	0.000856768	Pianp
ENSMUSG00000030359	4.60956	0.00299385	0.0121299	Pzp
ENSMUSG00000030399	1.13343	0.00396074	0.0153554	Ckm
ENSMUSG00000030401	-1.14273	0.00261238	0.0108494	Rtn2
ENSMUSG00000030402	-1.81784	6.01e-06	6.07e-05	Ppm1n
ENSMUSG00000030403	1.16148	4.15e-07	5.62e-06	Vasp
ENSMUSG00000030409	1.03579	0.00298778	0.0121118	Dmpk
ENSMUSG00000030410	1.00591	0.0104708	0.0341064	Dmwd
ENSMUSG00000030413	2.07445	0.000281012	0.00165278	Pglyrp1
ENSMUSG00000030433	-1.01177	0.0141987	0.0436753	Sbk2
ENSMUSG00000030465	-2.19489	1.33e-08	2.58e-07	Psd3
ENSMUSG00000030468	-1.83922	1.44e-06	1.73e-05	Siglecg
ENSMUSG00000030474	1.0165	0.00203621	0.00881034	Siglece
ENSMUSG00000030498	1.20216	0.000632209	0.00332243	Gas2
ENSMUSG00000030515	-1.05319	9.48e-05	0.000664095	Tarsl2
ENSMUSG00000030530	1.08597	3.18e-15	2.06e-13	Furin
ENSMUSG00000030541	-1.09436	1.92e-15	1.27e-13	Idh2
ENSMUSG00000030554	-2.38231	0.000521237	0.00282171	Synm
ENSMUSG00000030555	-1.48425	0.00422005	0.0161318	Ttc23
ENSMUSG00000030577	-1.3454	1.06e-09	2.6e-08	Cd22
ENSMUSG00000030651	-3.8338	2.83e-14	1.59e-12	Art2b
ENSMUSG00000030683	-1.22957	0.000258066	0.00153832	Sez6l2
ENSMUSG00000030724	-1.78619	7.13e-05	0.000519392	Cd19
ENSMUSG00000030737	-2.82031	3.47e-19	3.54e-17	Slco2b1
ENSMUSG00000030742	-1.00355	0.000614486	0.00324852	Lat
ENSMUSG00000030745	-1.61637	8.47e-25	2.07e-22	Il21r
ENSMUSG00000030747	1.51305	1.26e-10	3.72e-09	Dgat2
ENSMUSG00000030786	1.19	3.91e-11	1.29e-09	Itgam
ENSMUSG00000030787	1.80703	5.68e-06	5.81e-05	Lyve1
ENSMUSG00000030789	-1.24924	2.18e-12	9.22e-11	Itgax
ENSMUSG00000030806	-1.29874	2.15e-05	0.000185219	Stx1b
ENSMUSG00000030844	-1.50872	9.12e-14	4.76e-12	Rgs10
ENSMUSG00000030849	-1.37826	0.00863295	0.0290871	Fgfr2
ENSMUSG00000030852	-1.9903	2.28e-11	7.92e-10	Tacc2
ENSMUSG00000030865	-3.6206	7.97e-07	1.01e-05	Chp2
ENSMUSG00000030882	-2.58579	1.03e-06	1.28e-05	Dnhd1
ENSMUSG00000030895	5.04073	0.00012589	0.000842329	Hpx
ENSMUSG00000030922	1.06745	8.37e-06	8.15e-05	Lyrm1
ENSMUSG00000030946	-1.02045	5.1e-05	0.000388653	Lhpp
ENSMUSG00000030979	-1.22493	5.63e-05	0.000424423	Uros
ENSMUSG00000031015	-1.19667	6.63e-12	2.58e-10	Swap70
ENSMUSG00000031016	1.0427	1.17e-05	0.000108939	Wee1
ENSMUSG00000031024	-1.0917	0.00206101	0.00890408	St5
ENSMUSG00000031066	-1.37913	4.32e-11	1.41e-09	Usp11
ENSMUSG00000031098	-1.57804	0.000161921	0.00103982	Syt8
ENSMUSG00000031104	2.43255	1.45e-05	0.00013124	Rab33a
ENSMUSG00000031129	-2.8557	1.56e-19	1.74e-17	Slc9a9
ENSMUSG00000031134	1.06702	6.43e-09	1.33e-07	Rbmx
ENSMUSG00000031142	-1.32025	0.0108835	0.0352245	Cacna1f
ENSMUSG00000031146	1.82143	1.23e-22	2.13e-20	Plp2
ENSMUSG00000031167	1.07492	5.42e-06	5.58e-05	Rbm3
ENSMUSG00000031214	-1.07902	0.000101192	0.000702214	Ophn1
ENSMUSG00000031227	1.08808	2.33e-07	3.44e-06	Magee1
ENSMUSG00000031337	1.03194	1.83e-09	4.28e-08	Mtm1
ENSMUSG00000031355	-1.80956	2.7e-06	3.01e-05	Arhgap6
ENSMUSG00000031381	1.35903	9.02e-15	5.5e-13	Piga
ENSMUSG00000031385	-1.32374	0.00192418	0.00838161	Plxnb3
ENSMUSG00000031400	1.05082	1.57e-08	2.98e-07	G6pdx
ENSMUSG00000031441	1.37309	2e-12	8.53e-11	Atp11a
ENSMUSG00000031444	1.34199	7.02e-12	2.7e-10	F10
ENSMUSG00000031480	-1.69643	0.00271664	0.0112082	Thsd1
ENSMUSG00000031490	1.38202	9.16e-08	1.46e-06	Eif4ebp1
ENSMUSG00000031586	1.1049	2.17e-06	2.5e-05	Rbpms
ENSMUSG00000031594	3.94917	0.00175079	0.00775248	Fgl1
ENSMUSG00000031608	-1.04104	1.68e-05	0.000149743	Galnt7
ENSMUSG00000031610	2.72272	0.000216454	0.0013297	Scrg1
ENSMUSG00000031652	1.39445	2.45e-16	1.8e-14	N4bp1
ENSMUSG00000031659	-1.06555	0.00109136	0.00520752	Adcy7
ENSMUSG00000031756	-1.19142	0.000447595	0.0024846	Cenpn
ENSMUSG00000031760	1.97371	0.000573614	0.00305634	Mt3
ENSMUSG00000031762	1.02343	0.000808307	0.00406443	Mt2
ENSMUSG00000031778	-1.38061	1.04e-06	1.29e-05	Cx3cl1
ENSMUSG00000031779	-2.85432	1.92e-05	0.000167551	Ccl22
ENSMUSG00000031790	-1.64262	6.53e-07	8.45e-06	Mmp15
ENSMUSG00000031792	1.43514	4.98e-11	1.59e-09	Usb1
ENSMUSG00000031825	3.04979	8.72e-06	8.45e-05	Crispld2
ENSMUSG00000031837	-2.16457	0.00926432	0.0308774	Necab2
ENSMUSG00000031844	2.40975	8.63e-05	0.000611288	Hsd17b2
ENSMUSG00000031877	1.94346	4.94e-13	2.29e-11	Ces2g
ENSMUSG00000031903	-1.46386	1.89e-23	3.89e-21	Pla2g15
ENSMUSG00000031906	1.6717	0.000344552	0.00198313	Smpd3
ENSMUSG00000031925	-1.30596	1.23e-06	1.5e-05	Maml2
ENSMUSG00000031927	3.43942	4.5e-07	6.04e-06	1700012B09Rik
ENSMUSG00000031930	1.12913	4.72e-09	9.99e-08	Wwp2
ENSMUSG00000031949	-1.30959	0.00652072	0.0231799	Adat1
ENSMUSG00000031951	-1.03365	0.00266688	0.011035	Tmem231
ENSMUSG00000031953	1.10187	3e-05	0.000244882	Tmem170
ENSMUSG00000031958	-1.48881	2.41e-07	3.52e-06	Ldhd
ENSMUSG00000031971	-1.29067	0.00191939	0.00836839	Ccsap
ENSMUSG00000031972	2.42249	9.57e-14	4.96e-12	Acta1
ENSMUSG00000031980	4.51139	2.68e-05	0.000224057	Agt
ENSMUSG00000031995	-1.34478	4.22e-14	2.28e-12	St14
ENSMUSG00000032012	-1.85085	2.19e-07	3.27e-06	Nectin1
ENSMUSG00000032024	1.13337	2.6e-14	1.49e-12	Clmp
ENSMUSG00000032036	-1.20265	0.0013224	0.00613881	Kirrel3
ENSMUSG00000032041	1.19137	8.01e-07	1.01e-05	Tirap
ENSMUSG00000032046	-1.022	3.97e-10	1.07e-08	Abhd12
ENSMUSG00000032064	2.52689	3.28e-10	9.01e-09	Dixdc1
ENSMUSG00000032076	-2.2532	3e-23	5.75e-21	Cadm1
ENSMUSG00000032079	8.40356	0.00244699	0.0102596	Apoa5
ENSMUSG00000032083	6.19511	0.00228651	0.00968166	Apoa1
ENSMUSG00000032091	-1.02567	0.00260244	0.0108203	Tmprss4
ENSMUSG00000032105	-1.49485	0.00886099	0.0297355	Pdzd3
ENSMUSG00000032122	-1.24716	6.22e-11	1.96e-09	Slc37a2
ENSMUSG00000032174	-1.71945	0.00160348	0.00722819	Icam5
ENSMUSG00000032177	-1.26653	4.09e-08	7.16e-07	Pde4a
ENSMUSG00000032192	1.26635	2.88e-05	0.000236532	Gnb5
ENSMUSG00000032251	-1.53544	0.000818199	0.00410299	Irak1bp1
ENSMUSG00000032254	-1.2927	1.89e-11	6.62e-10	Kif23
ENSMUSG00000032271	1.63648	0.00580394	0.0209944	Nnmt
ENSMUSG00000032281	1.44845	1.83e-10	5.26e-09	Acsbg1
ENSMUSG00000032294	1.06638	3.73e-09	8.1e-08	Pkm
ENSMUSG00000032300	1.41004	5.94e-10	1.53e-08	1700017B05Rik
ENSMUSG00000032311	1.26287	1.61e-06	1.91e-05	Nrg4
ENSMUSG00000032332	-1.36387	0.0155879	0.0471419	Col12a1
ENSMUSG00000032363	1.12468	0.000877286	0.00434398	Adamts7
ENSMUSG00000032369	1.70651	1.15e-11	4.18e-10	Plscr1
ENSMUSG00000032375	2.12899	4.28e-26	1.27e-23	Aph1b
ENSMUSG00000032413	1.74224	4.77e-14	2.55e-12	Rasa2
ENSMUSG00000032496	1.2703	0.0018536	0.00814426	Ltf
ENSMUSG00000032497	1.14273	3.35e-06	3.65e-05	Lrrfip2
ENSMUSG00000032508	1.51266	4.29e-12	1.73e-10	Myd88
ENSMUSG00000032514	-2.48633	1.31e-05	0.000121253	Ttc21a
ENSMUSG00000032523	-2.85157	0.0037122	0.0145547	Hhatl
ENSMUSG00000032527	-1.09895	7.17e-12	2.74e-10	Pccb
ENSMUSG00000032528	-1.11353	0.000555759	0.00297459	Vipr1
ENSMUSG00000032549	-1.34947	1.82e-05	0.000160318	Rab6b
ENSMUSG00000032554	-1.20964	6.32e-08	1.05e-06	Trf
ENSMUSG00000032578	1.32601	1.05e-05	9.9e-05	Cish
ENSMUSG00000032584	1.42166	0.00106751	0.00510571	Mst1r
ENSMUSG00000032589	-1.05371	0.00228473	0.00968166	Bsn
ENSMUSG00000032599	1.01522	4.27e-06	4.51e-05	Ip6k2
ENSMUSG00000032606	-1.04594	0.000408371	0.00230286	Nicn1
ENSMUSG00000032648	-1.387	2.48e-06	2.79e-05	Pygm
ENSMUSG00000032661	1.17146	4.37e-11	1.42e-09	Oas3
ENSMUSG00000032679	-1.16201	0.00212739	0.00913805	Cd59a
ENSMUSG00000032718	-1.35309	2.92e-05	0.000239553	Mansc1
ENSMUSG00000032737	-1.05522	2.79e-05	0.000230501	Inppl1
ENSMUSG00000032739	1.71722	1.96e-07	2.94e-06	Pram1
ENSMUSG00000032741	-1.57005	2.29e-14	1.33e-12	Tpcn1
ENSMUSG00000032766	-1.29126	1.46e-07	2.26e-06	Gng11
ENSMUSG00000032776	1.03884	1.79e-06	2.1e-05	Mctp2
ENSMUSG00000032782	-1.22662	7.69e-05	0.000554194	Cntrob
ENSMUSG00000032786	1.13808	1.52e-14	8.93e-13	Alas1
ENSMUSG00000032841	-1.63722	8.31e-27	2.81e-24	Prr5l
ENSMUSG00000032872	1.25439	6.46e-07	8.39e-06	Cyb5r4
ENSMUSG00000032875	-1.33959	0.00121441	0.00571972	Arhgef17
ENSMUSG00000032878	-2.04489	0.0101082	0.0331764	Ccdc85a
ENSMUSG00000032911	-3.29042	6.87e-11	2.15e-09	Cspg4
ENSMUSG00000032942	-1.78599	4.64e-06	4.84e-05	Ucp3
ENSMUSG00000033022	-1.41725	0.000448249	0.00248668	Cdo1
ENSMUSG00000033032	-1.32502	0.00183614	0.00807501	Afap1l1
ENSMUSG00000033033	-1.37474	0.000131251	0.000871631	Calhm2
ENSMUSG00000033082	-2.03896	7.43e-06	7.33e-05	Clec1a
ENSMUSG00000033083	-2.17944	9.58e-13	4.24e-11	Tbc1d4
ENSMUSG00000033088	1.46197	2.4e-18	2.24e-16	Triobp
ENSMUSG00000033157	1.03938	1.7e-06	2.01e-05	Abhd10
ENSMUSG00000033170	-2.03008	3.15e-12	1.31e-10	Card10
ENSMUSG00000033191	-1.88221	1.05e-11	3.85e-10	Tie1
ENSMUSG00000033207	-2.6571	6.01e-06	6.07e-05	Mamdc2
ENSMUSG00000033209	-1.59344	0.000106238	0.00072939	Ttc28
ENSMUSG00000033213	2.01081	9.47e-15	5.73e-13	AA467197
ENSMUSG00000033276	1.13269	0.00123979	0.00581995	Stk36
ENSMUSG00000033318	-1.42559	1.14e-12	4.95e-11	Gstt2
ENSMUSG00000033350	-1.88912	6.17e-05	0.000458573	Chst2
ENSMUSG00000033355	1.52025	2.5e-11	8.51e-10	Rtp4
ENSMUSG00000033377	-2.1591	0.000485159	0.00266088	Palmd
ENSMUSG00000033420	-1.27884	3.58e-05	0.00028611	Antxr1
ENSMUSG00000033446	-1.58474	6.88e-08	1.14e-06	Lpar6
ENSMUSG00000033487	1.43351	9.43e-14	4.9e-12	Fndc3a
ENSMUSG00000033488	-1.04621	1.08e-08	2.13e-07	Cryzl2
ENSMUSG00000033499	1.38207	1.13e-10	3.37e-09	Larp4b
ENSMUSG00000033508	2.56438	1.86e-05	0.000163472	Asprv1
ENSMUSG00000033538	1.22553	2.15e-09	4.96e-08	Casp4
ENSMUSG00000033595	-2.99234	8.46e-08	1.36e-06	Lgi3
ENSMUSG00000033610	-2.63217	6.63e-05	0.000489332	Pank1
ENSMUSG00000033684	2.19544	1.53e-08	2.91e-07	Qsox1
ENSMUSG00000033697	-1.33736	3.14e-09	6.96e-08	Arhgap39
ENSMUSG00000033705	-1.46297	4.2e-05	0.00032883	Stard9
ENSMUSG00000033715	2.35419	3.03e-06	3.32e-05	Akr1c14
ENSMUSG00000033763	-2.04423	2e-08	3.75e-07	Mtss1l
ENSMUSG00000033777	1.23541	5.55e-07	7.29e-06	Tlr13
ENSMUSG00000033831	6.0594	0.000678191	0.00351467	Fgb
ENSMUSG00000033860	5.73938	9.74e-05	0.000679161	Fgg
ENSMUSG00000033863	2.24325	6.23e-37	5.9e-34	Klf9
ENSMUSG00000033885	1.17507	1.2e-08	2.35e-07	Pxk
ENSMUSG00000033910	-1.46115	7.11e-05	0.000518195	Gucy1a1
ENSMUSG00000033917	1.49113	3.46e-11	1.16e-09	Gde1
ENSMUSG00000033949	-1.55835	1.75e-05	0.000155128	Trim36
ENSMUSG00000033952	-1.25184	0.000903827	0.00444559	Aspm
ENSMUSG00000034041	-1.03778	2.04e-07	3.05e-06	Lyl1
ENSMUSG00000034112	1.66264	0.000866284	0.00429964	Atp2c2
ENSMUSG00000034118	1.64921	7.21e-24	1.6e-21	Tpst1
ENSMUSG00000034135	1.25226	7.84e-10	1.96e-08	Sik3
ENSMUSG00000034159	1.56982	0.0010214	0.00492663	2310007B03Rik
ENSMUSG00000034164	-2.50293	2.9e-06	3.2e-05	Emid1
ENSMUSG00000034165	1.08511	5.95e-11	1.87e-09	Ccnd3
ENSMUSG00000034171	-1.27458	0.000266285	0.00158201	Faah
ENSMUSG00000034177	-1.50145	0.012066	0.0383784	Rnf43
ENSMUSG00000034218	-1.10124	0.00658727	0.0233697	Atm
ENSMUSG00000034226	1.35851	0.000476432	0.0026186	Rhov
ENSMUSG00000034245	-2.19304	0.000775782	0.00392171	Hdac11
ENSMUSG00000034248	1.02233	6.46e-07	8.39e-06	Slc25a37
ENSMUSG00000034258	-2.30396	6.59e-18	5.93e-16	Flvcr2
ENSMUSG00000034265	-1.96048	4.73e-08	8.19e-07	Zdhhc14
ENSMUSG00000034282	-1.42713	0.0155381	0.0470216	Evpl
ENSMUSG00000034285	-1.26387	0.000269354	0.00159624	Nipsnap1
ENSMUSG00000034361	1.58863	6.85e-20	7.91e-18	Cpne2
ENSMUSG00000034394	-1.22607	0.00229127	0.00969252	Lif
ENSMUSG00000034413	-1.45121	0.00165065	0.00740838	Neurl1b
ENSMUSG00000034416	-3.14563	0.00680588	0.0239929	Pkd1l2
ENSMUSG00000034422	1.548	2.83e-13	1.35e-11	Parp14
ENSMUSG00000034424	-1.1428	1.24e-07	1.93e-06	Gcsh
ENSMUSG00000034452	-1.34508	0.00165985	0.00743089	Slc24a1
ENSMUSG00000034459	1.58675	9.81e-06	9.38e-05	Ifit1
ENSMUSG00000034487	-1.44876	1.92e-06	2.23e-05	Kdelc2
ENSMUSG00000034610	1.25479	1.78e-07	2.7e-06	Zcchc11
ENSMUSG00000034614	1.32183	5.91e-06	6.01e-05	Pik3ip1
ENSMUSG00000034634	-2.02394	2.22e-10	6.27e-09	Ly6d
ENSMUSG00000034652	-1.79961	4.84e-46	1.38e-42	Cd300a
ENSMUSG00000034686	-1.28366	0.001525	0.00692761	Prr7
ENSMUSG00000034730	2.47596	3.36e-13	1.59e-11	Adgrb1
ENSMUSG00000034758	-3.40076	1.03e-07	1.63e-06	Tle6
ENSMUSG00000034771	-2.42802	5.67e-05	0.000427202	Tle2
ENSMUSG00000034773	-1.05069	0.0112936	0.0363282	BC030867
ENSMUSG00000034807	-1.00359	1.22e-13	6.24e-12	Colgalt1
ENSMUSG00000034810	-3.51892	3.88e-08	6.85e-07	Scn7a
ENSMUSG00000034833	-2.07979	0.00437209	0.0166324	Tespa1
ENSMUSG00000034848	-1.36305	0.000188641	0.00118673	Ttc21b
ENSMUSG00000034854	-1.18468	1.39e-18	1.34e-16	Mfsd12
ENSMUSG00000034855	1.37828	6.53e-08	1.08e-06	Cxcl10
ENSMUSG00000034898	1.21082	0.000629231	0.00331291	Filip1
ENSMUSG00000034911	-2.80203	4.27e-07	5.76e-06	Ushbp1
ENSMUSG00000034926	-1.13272	1.98e-07	2.97e-06	Dhcr24
ENSMUSG00000034959	1.58037	8.2e-09	1.65e-07	Rubcnl
ENSMUSG00000034997	2.4863	4.47e-06	4.7e-05	Htr2a
ENSMUSG00000035000	-1.24763	0.00420256	0.0160953	Dpp4
ENSMUSG00000035042	-1.15663	7.86e-06	7.72e-05	Ccl5
ENSMUSG00000035064	-2.24579	2.33e-23	4.72e-21	Eef2k
ENSMUSG00000035085	1.21509	0.00391953	0.0152289	1700020L24Rik
ENSMUSG00000035095	1.83783	8.09e-08	1.31e-06	Fam167a
ENSMUSG00000035105	3.21362	9.56e-16	6.59e-14	Egln3
ENSMUSG00000035121	-2.04293	7.13e-05	0.000519068	Neil2
ENSMUSG00000035165	-1.8821	0.00515189	0.0190183	Kcne3
ENSMUSG00000035172	-1.01139	0.0045094	0.0170816	Plekhh3
ENSMUSG00000035208	1.68878	3.1e-21	4.41e-19	Slfn8
ENSMUSG00000035232	1.54873	2.34e-14	1.35e-12	Pdk3
ENSMUSG00000035248	1.0867	6.85e-06	6.82e-05	Zcchc6
ENSMUSG00000035262	-1.57273	0.00458925	0.0173311	Amh
ENSMUSG00000035273	-1.14264	4.49e-09	9.58e-08	Hpse
ENSMUSG00000035279	-1.93179	8.05e-05	0.000576671	Ssc5d
ENSMUSG00000035283	-1.99536	8.97e-06	8.66e-05	Adrb1
ENSMUSG00000035284	-1.52016	7.17e-05	0.000521474	Vps13c
ENSMUSG00000035342	-1.11353	0.000180659	0.00114259	Lzts2
ENSMUSG00000035355	-2.57756	2.5e-09	5.66e-08	Kcnh4
ENSMUSG00000035385	1.05026	0.000123353	0.000829653	Ccl2
ENSMUSG00000035448	-1.99088	1.08e-05	0.000102159	Ccr3
ENSMUSG00000035456	-2.48326	0.00364834	0.0143758	Prdm8
ENSMUSG00000035458	-2.07455	3.96e-07	5.41e-06	Tnni3
ENSMUSG00000035539	1.33975	4.29e-05	0.000334453	Ccdc180
ENSMUSG00000035540	6.64987	0.000790311	0.00398522	Gc
ENSMUSG00000035547	-1.21286	7.1e-05	0.000517858	Capn5
ENSMUSG00000035640	-1.57565	5.04e-09	1.06e-07	Cbarp
ENSMUSG00000035781	1.12187	0.000819628	0.00410689	R3hdm4
ENSMUSG00000035790	1.25193	0.000464131	0.00256337	Cep19
ENSMUSG00000035840	1.30295	0.000244698	0.00147411	Lysmd3
ENSMUSG00000035967	1.02608	2.46e-07	3.58e-06	Ints6l
ENSMUSG00000036002	1.02689	8.11e-11	2.48e-09	Fam214b
ENSMUSG00000036053	1.33402	3.17e-08	5.72e-07	Fmnl2
ENSMUSG00000036086	-1.3078	1.45e-08	2.79e-07	Zranb3
ENSMUSG00000036111	3.14321	1.15e-07	1.81e-06	Lmo1
ENSMUSG00000036136	2.26069	4.79e-06	5e-05	Fam110c
ENSMUSG00000036158	-1.5398	0.000575542	0.00306431	Prickle1
ENSMUSG00000036181	-1.5192	1.5e-08	2.86e-07	Hist1h1c
ENSMUSG00000036206	-1.39211	8.71e-09	1.75e-07	Sh3bp4
ENSMUSG00000036223	-1.41447	0.00689507	0.0242257	Ska1
ENSMUSG00000036278	-1.66156	4.49e-07	6.03e-06	Macrod1
ENSMUSG00000036362	1.21107	7.25e-11	2.25e-09	P2ry13
ENSMUSG00000036377	-2.86146	1.22e-32	7.21e-30	C530008M17Rik
ENSMUSG00000036390	1.68462	8.43e-08	1.36e-06	Gadd45a
ENSMUSG00000036402	1.09578	5.41e-13	2.49e-11	Gng12
ENSMUSG00000036427	1.09482	3.76e-09	8.15e-08	Gpi1
ENSMUSG00000036526	-2.24609	2.84e-30	1.39e-27	Card11
ENSMUSG00000036528	-1.22127	5.79e-08	9.79e-07	Ppfibp2
ENSMUSG00000036533	-2.02464	3.35e-33	2.16e-30	Cdc42ep3
ENSMUSG00000036560	-2.53717	1.23e-05	0.000113974	Lgi4
ENSMUSG00000036578	-1.49101	0.0160596	0.0483012	Fxyd7
ENSMUSG00000036587	-1.24299	2.85e-06	3.16e-05	Fut7
ENSMUSG00000036594	-1.14077	4.24e-19	4.27e-17	H2-Aa
ENSMUSG00000036617	-1.54716	0.00557231	0.0202909	Etl4
ENSMUSG00000036646	-1.0938	1.91e-08	3.6e-07	Man1b1
ENSMUSG00000036667	-1.02435	6.82e-05	0.000501008	Tcaf1
ENSMUSG00000036840	1.06711	1.83e-06	2.14e-05	Siah1a
ENSMUSG00000036862	-1.93531	1.16e-05	0.000108079	Dchs1
ENSMUSG00000036887	-1.87691	4.26e-21	5.93e-19	C1qa
ENSMUSG00000036896	-1.7023	1.37e-20	1.78e-18	C1qc
ENSMUSG00000036905	-1.548	1.01e-15	6.91e-14	C1qb
ENSMUSG00000036918	-1.14785	2.12e-17	1.71e-15	Ttc7
ENSMUSG00000036944	1.29024	2.33e-05	0.000198188	Tmem71
ENSMUSG00000036983	-1.2446	0.00131194	0.00609821	Tfb1m
ENSMUSG00000036986	1.11039	4.67e-09	9.93e-08	Pml
ENSMUSG00000036995	-1.29924	0.000474364	0.00260873	Asap3
ENSMUSG00000037001	-1.59271	0.00221117	0.00942382	Zfp39
ENSMUSG00000037012	1.35606	5.29e-20	6.42e-18	Hk1
ENSMUSG00000037138	-1.40546	0.00663305	0.0235086	Aff3
ENSMUSG00000037161	1.19374	0.00109559	0.00522592	Mgarp
ENSMUSG00000037166	-1.59231	2.62e-06	2.94e-05	Ppp1r14a
ENSMUSG00000037172	1.79854	2.15e-12	9.12e-11	E330009J07Rik
ENSMUSG00000037185	-1.1486	7.01e-07	9.01e-06	Krt80
ENSMUSG00000037206	-1.42177	0.00736192	0.0255064	Islr
ENSMUSG00000037217	-2.08005	1.04e-08	2.04e-07	Syn1
ENSMUSG00000037224	-2.56175	2.24e-07	3.32e-06	Zfyve28
ENSMUSG00000037270	1.52591	2.08e-11	7.25e-10	4932438A13Rik
ENSMUSG00000037337	-1.23478	2.68e-19	2.79e-17	Map4k1
ENSMUSG00000037341	-2.55607	2.48e-11	8.46e-10	Slc9a7
ENSMUSG00000037361	1.04189	2.44e-11	8.36e-10	Sf3b6
ENSMUSG00000037386	2.55035	0.00026076	0.00155243	Rims2
ENSMUSG00000037400	1.2617	3.71e-08	6.58e-07	Atp11b
ENSMUSG00000037419	-1.4734	5.69e-22	8.6e-20	Endod1
ENSMUSG00000037432	-1.46862	5.11e-06	5.29e-05	Fer1l5
ENSMUSG00000037440	-2.2859	0.00172875	0.00768361	Vnn1
ENSMUSG00000037443	1.93284	1.2e-09	2.9e-08	Cep85
ENSMUSG00000037474	-1.03657	0.00135463	0.00626588	Dtl
ENSMUSG00000037477	1.49672	0.0102378	0.0335318	Tbx10
ENSMUSG00000037580	1.31051	6.73e-06	6.72e-05	Gch1
ENSMUSG00000037605	-1.78234	4.56e-05	0.00035179	Adgrl3
ENSMUSG00000037613	1.53153	2.43e-15	1.59e-13	Tnfrsf23
ENSMUSG00000037649	-1.21027	9.57e-12	3.55e-10	H2-DMa
ENSMUSG00000037661	-1.104	7.69e-08	1.25e-06	Gpr160
ENSMUSG00000037683	1.04026	0.00113397	0.0053801	Armc3
ENSMUSG00000037686	1.79157	0.000461339	0.00254993	Aspg
ENSMUSG00000037706	-1.39214	2.11e-10	5.97e-09	Cd81
ENSMUSG00000037720	1.04365	2.44e-08	4.5e-07	Tmem33
ENSMUSG00000037795	1.03718	0.00010486	0.000721328	N4bp2
ENSMUSG00000037798	1.70443	0.0141839	0.0436581	Mat1a
ENSMUSG00000037818	1.28461	7.44e-07	9.47e-06	Abhd18
ENSMUSG00000037849	1.8391	1.44e-25	3.86e-23	Ifi206
ENSMUSG00000037887	1.10947	4.82e-05	0.000369557	Dusp8
ENSMUSG00000037921	1.60919	4.47e-12	1.79e-10	Ddx60
ENSMUSG00000037922	-1.45594	0.00033767	0.00195016	Bank1
ENSMUSG00000037940	-1.38393	0.00341827	0.0135822	Inpp4b
ENSMUSG00000037944	-1.84564	1.11e-12	4.85e-11	Ccr7
ENSMUSG00000037960	1.00141	3.25e-05	0.000262778	Card19
ENSMUSG00000037972	-1.58695	5.88e-12	2.31e-10	Snn
ENSMUSG00000037995	-2.24197	5.28e-08	9.01e-07	Igsf9
ENSMUSG00000037999	1.40242	6.78e-11	2.12e-09	Arap2
ENSMUSG00000038037	1.47102	1.7e-31	8.96e-29	Socs1
ENSMUSG00000038042	-1.17497	0.00317048	0.0127258	Ptpdc1
ENSMUSG00000038067	1.9288	0.0103828	0.0338585	Csf3
ENSMUSG00000038068	-1.44454	1.55e-05	0.000139345	Rnf144b
ENSMUSG00000038070	-1.30098	8.28e-07	1.04e-05	Cntln
ENSMUSG00000038143	-1.02032	0.0121441	0.0386007	Stox2
ENSMUSG00000038146	-2.29885	1.32e-06	1.59e-05	Notch3
ENSMUSG00000038156	2.17556	3.3e-12	1.37e-10	Spon1
ENSMUSG00000038170	-1.07496	1.35e-05	0.000123647	Pde4dip
ENSMUSG00000038174	1.03672	0.000268739	0.00159387	Fam126b
ENSMUSG00000038195	-1.45145	1.19e-05	0.000110368	Rilp
ENSMUSG00000038214	-1.01442	7.68e-05	0.000553818	Bend3
ENSMUSG00000038252	-1.10485	2.98e-09	6.63e-08	Ncapd2
ENSMUSG00000038349	-1.76289	0.000105516	0.000725228	Plcl1
ENSMUSG00000038352	-1.56237	4e-09	8.62e-08	Arl5c
ENSMUSG00000038357	1.76911	0.0160481	0.0482873	Camp
ENSMUSG00000038390	-3.78741	1.17e-51	8.29e-48	Gpr162
ENSMUSG00000038412	1.11458	3.01e-06	3.31e-05	Higd1a
ENSMUSG00000038421	-1.58184	2.89e-05	0.000236888	Fcrla
ENSMUSG00000038463	1.7217	2.3e-18	2.17e-16	Olfml2b
ENSMUSG00000038467	1.19603	4.19e-06	4.43e-05	Chmp4b
ENSMUSG00000038495	1.31391	4.28e-12	1.73e-10	Otud7b
ENSMUSG00000038507	1.36718	3.75e-21	5.27e-19	Parp12
ENSMUSG00000038508	-3.18062	1.44e-25	3.86e-23	Gdf15
ENSMUSG00000038528	1.14107	0.0127584	0.0402027	Mfsd4b5
ENSMUSG00000038530	-2.02097	0.00417802	0.0160272	Rgs4
ENSMUSG00000038550	1.34607	4.57e-09	9.75e-08	Ciart
ENSMUSG00000038612	1.06969	4.44e-05	0.000343873	Mcl1
ENSMUSG00000038646	1.08686	1.02e-05	9.7e-05	Fam103a1
ENSMUSG00000038663	-1.34386	0.00165156	0.00741012	Fsd2
ENSMUSG00000038742	-1.25734	0.00382944	0.014932	Angptl6
ENSMUSG00000038776	-1.96575	1.33e-17	1.13e-15	Ephx1
ENSMUSG00000038791	-1.35669	0.000240957	0.00145589	Scgb3a2
ENSMUSG00000038793	-1.02694	0.0111692	0.0359768	Lefty1
ENSMUSG00000038797	-1.14315	0.00467147	0.0175628	Zscan2
ENSMUSG00000038811	-1.19592	6.31e-08	1.05e-06	Gngt2
ENSMUSG00000038886	-1.98444	2.63e-10	7.27e-09	Man2a2
ENSMUSG00000038936	1.00109	0.000177782	0.00112842	Sccpdh
ENSMUSG00000038943	-1.01433	0.000192233	0.00120506	Prc1
ENSMUSG00000038954	-1.43697	1.09e-11	3.99e-10	Supt3
ENSMUSG00000038963	1.46038	6.85e-07	8.82e-06	Slco4a1
ENSMUSG00000039004	-1.34856	0.00914055	0.0305438	Bmp6
ENSMUSG00000039005	1.26968	2.69e-08	4.92e-07	Tlr4
ENSMUSG00000039007	-1.85193	3.79e-26	1.17e-23	Cpq
ENSMUSG00000039013	-3.05149	1.61e-35	1.2e-32	Siglec5
ENSMUSG00000039057	-2.50447	0.000488742	0.00267537	Myo16
ENSMUSG00000039081	1.29707	2.05e-11	7.14e-10	Zfp503
ENSMUSG00000039099	1.40475	0.009199	0.0306934	Wdr93
ENSMUSG00000039109	2.82641	1.91e-27	6.95e-25	F13a1
ENSMUSG00000039115	-1.53013	1.79e-10	5.18e-09	Itga9
ENSMUSG00000039116	-1.21228	0.000615962	0.0032539	Adgrg6
ENSMUSG00000039126	-1.39708	1.01e-11	3.74e-10	Prune2
ENSMUSG00000039187	-1.18127	0.00399691	0.0154553	Fanci
ENSMUSG00000039195	1.04886	8.62e-06	8.36e-05	1110008P14Rik
ENSMUSG00000039206	-1.4989	1.72e-11	6.1e-10	Daglb
ENSMUSG00000039208	1.16137	5.24e-07	6.94e-06	Metrnl
ENSMUSG00000039209	1.21209	0.00678304	0.0239268	Rpl39l
ENSMUSG00000039232	1.20728	6.9e-05	0.00050565	Stx11
ENSMUSG00000039236	1.86105	2.97e-13	1.41e-11	Isg20
ENSMUSG00000039239	3.00933	7.23e-15	4.46e-13	Tgfb2
ENSMUSG00000039316	-1.01827	4.45e-12	1.79e-10	Rftn1
ENSMUSG00000039328	-1.05625	0.0128943	0.0405049	Rnf122
ENSMUSG00000039349	-1.44421	0.00200302	0.00869054	C130074G19Rik
ENSMUSG00000039395	1.55547	2.82e-09	6.31e-08	Mreg
ENSMUSG00000039457	1.18179	0.00180312	0.00794702	Ppl
ENSMUSG00000039531	1.03939	1.79e-07	2.72e-06	Zufsp
ENSMUSG00000039693	1.08104	2.13e-08	3.98e-07	Msantd3
ENSMUSG00000039699	1.52689	1.53e-13	7.7e-12	Batf2
ENSMUSG00000039706	-1.50519	0.000448944	0.00248917	Ldb2
ENSMUSG00000039735	-1.1025	3.93e-06	4.21e-05	Fnbp1l
ENSMUSG00000039753	1.66211	2.1e-14	1.22e-12	Fbxl5
ENSMUSG00000039760	-1.50431	0.00528388	0.0193997	Il22ra2
ENSMUSG00000039770	1.18345	1.21e-05	0.000111821	Ypel5
ENSMUSG00000039783	-2.32585	2.93e-07	4.17e-06	Kmo
ENSMUSG00000039795	-1.06323	8.88e-06	8.59e-05	Zfand1
ENSMUSG00000039813	1.29402	1.72e-17	1.4e-15	Tbc1d2
ENSMUSG00000039886	1.16031	2.66e-05	0.000222063	Tmem120a
ENSMUSG00000039891	-1.57133	0.000411981	0.00231954	Txlnb
ENSMUSG00000039899	-1.02523	9.79e-06	9.38e-05	Fgl2
ENSMUSG00000039953	-1.21838	1.06e-09	2.61e-08	Clstn1
ENSMUSG00000039956	2.85975	2e-05	0.000173833	Mrap
ENSMUSG00000039960	1.9822	2.25e-12	9.46e-11	Rhou
ENSMUSG00000039967	1.09972	4.38e-06	4.6e-05	Zfp292
ENSMUSG00000039976	-1.86472	1.24e-08	2.43e-07	Tbc1d16
ENSMUSG00000040061	-1.00353	1.85e-09	4.31e-08	Plcb2
ENSMUSG00000040181	-2.5752	2.36e-06	2.69e-05	Fmo1
ENSMUSG00000040209	-1.67815	2.93e-06	3.23e-05	Zfp704
ENSMUSG00000040229	-2.61394	0.000156149	0.0010096	Gpr34
ENSMUSG00000040270	-1.19505	0.00265943	0.0110105	Bach2
ENSMUSG00000040280	-1.94453	4.75e-06	4.96e-05	Ndufa4l2
ENSMUSG00000040296	1.0567	9.5e-12	3.53e-10	Ddx58
ENSMUSG00000040297	1.22652	4.6e-05	0.000354559	Suco
ENSMUSG00000040312	-1.19698	0.000185354	0.00116968	Cchcr1
ENSMUSG00000040322	1.16619	1.3e-10	3.83e-09	Slc25a24
ENSMUSG00000040328	1.53638	7.53e-18	6.64e-16	Olfr56
ENSMUSG00000040350	-2.42819	1.56e-13	7.79e-12	Trim7
ENSMUSG00000040380	1.63151	0.000237011	0.00143633	Cbln3
ENSMUSG00000040412	-1.6222	0.000103448	0.000714035	5330417C22Rik
ENSMUSG00000040451	1.03767	7.03e-09	1.44e-07	Sgms1
ENSMUSG00000040483	1.90139	5.66e-21	7.77e-19	Xaf1
ENSMUSG00000040488	-1.30314	7.47e-06	7.36e-05	Ltbp4
ENSMUSG00000040537	-1.40509	0.000708969	0.0036436	Adam22
ENSMUSG00000040564	1.06795	0.00311292	0.0125409	Apoc1
ENSMUSG00000040584	-1.38998	0.000167669	0.00107189	Abcb1a
ENSMUSG00000040592	-1.13253	0.0125213	0.0396204	Cd79b
ENSMUSG00000040652	1.23632	0.000174837	0.00111171	Oaz2
ENSMUSG00000040693	1.40902	1.5e-05	0.000135604	Slco4c1
ENSMUSG00000040703	1.31361	1.02e-09	2.51e-08	Cyp2s1
ENSMUSG00000040722	-1.08365	3.03e-06	3.32e-05	Scamp5
ENSMUSG00000040734	1.64457	4.59e-15	2.94e-13	Ppp1r13l
ENSMUSG00000040747	1.36172	1.69e-12	7.28e-11	Cd53
ENSMUSG00000040820	-1.06089	5.42e-08	9.22e-07	Hlcs
ENSMUSG00000040829	-1.33526	1.52e-08	2.91e-07	Zmynd15
ENSMUSG00000040855	-1.05191	0.00471855	0.0176806	Reps2
ENSMUSG00000040860	-1.13044	3.34e-07	4.67e-06	Crocc
ENSMUSG00000041012	-1.64668	1.45e-05	0.00013124	Cmtm8
ENSMUSG00000041073	-2.4244	7.29e-07	9.32e-06	Nacad
ENSMUSG00000041180	-1.65176	0.00203874	0.00881862	Hectd2
ENSMUSG00000041202	-2.06176	2.18e-09	5.01e-08	Pla2g2d
ENSMUSG00000041220	-1.72393	2.87e-05	0.000236385	Elovl6
ENSMUSG00000041261	-1.01453	0.0117551	0.0375576	Car8
ENSMUSG00000041308	1.13082	6.03e-08	1.01e-06	Sntb2
ENSMUSG00000041324	1.32932	0.000202156	0.00125783	Inhba
ENSMUSG00000041351	-1.15386	0.0067481	0.0238363	Rap1gap
ENSMUSG00000041361	-1.39875	0.00946101	0.0314371	Myzap
ENSMUSG00000041380	-1.74269	6.21e-06	6.25e-05	Htr2c
ENSMUSG00000041444	-1.26187	0.00645407	0.0229832	Arhgap32
ENSMUSG00000041445	-1.18277	0.00100041	0.00484185	Mmrn2
ENSMUSG00000041479	-2.18318	0.0134379	0.0418242	Syt15
ENSMUSG00000041482	-1.76774	0.00209717	0.0090314	Piezo2
ENSMUSG00000041483	1.32239	3.83e-10	1.04e-08	Zfp281
ENSMUSG00000041498	-1.33616	0.000851333	0.00423876	Kif14
ENSMUSG00000041538	-2.10896	2.16e-13	1.05e-11	H2-Ob
ENSMUSG00000041577	-1.3112	0.00686625	0.0241483	Prelp
ENSMUSG00000041594	-1.17716	0.001057	0.00507082	Tmtc4
ENSMUSG00000041633	-1.93583	7.18e-05	0.000521604	Kctd12b
ENSMUSG00000041707	-2.07169	4.82e-12	1.91e-10	1810011H11Rik
ENSMUSG00000041729	-2.04315	2.52e-13	1.21e-11	Coro2b
ENSMUSG00000041736	1.04326	0.000283714	0.00166742	Tspo
ENSMUSG00000041741	-1.5368	0.000425331	0.00238525	Pde3a
ENSMUSG00000041762	-1.32044	6.35e-09	1.32e-07	Gpr155
ENSMUSG00000041797	-2.21552	4.09e-07	5.55e-06	Abca9
ENSMUSG00000041801	-1.80288	1.38e-13	6.96e-12	Phlda3
ENSMUSG00000041849	1.42558	1.79e-07	2.72e-06	Card6
ENSMUSG00000041859	-1.21708	2.48e-11	8.46e-10	Mcm3
ENSMUSG00000041895	1.47139	4.8e-22	7.5e-20	Wipi1
ENSMUSG00000041961	-1.59041	6.05e-07	7.93e-06	Znrf3
ENSMUSG00000042029	-1.47322	6.11e-08	1.02e-06	Ncapg2
ENSMUSG00000042035	-1.41967	0.000431832	0.00241693	Igsf3
ENSMUSG00000042099	-1.42339	2.12e-09	4.92e-08	Kank3
ENSMUSG00000042115	1.33941	0.000161195	0.0010361	Klhdc8a
ENSMUSG00000042129	-1.29083	7.66e-08	1.25e-06	Rassf4
ENSMUSG00000042155	-1.76021	0.00722755	0.0251635	Klhl23
ENSMUSG00000042213	1.08358	0.000893003	0.00440302	Zfand4
ENSMUSG00000042249	-1.40598	6.44e-09	1.33e-07	Grk3
ENSMUSG00000042250	-1.16711	0.00702474	0.0245961	Pglyrp4
ENSMUSG00000042306	1.84976	0.000951625	0.00464211	S100a14
ENSMUSG00000042351	-1.8262	2.07e-06	2.4e-05	Grap2
ENSMUSG00000042377	1.55485	0.000443692	0.00247163	Fam83g
ENSMUSG00000042385	-1.01467	0.00667469	0.0236385	Gzmk
ENSMUSG00000042436	-2.64294	7.12e-09	1.46e-07	Mfap4
ENSMUSG00000042474	-1.30598	0.0020905	0.00900957	Fcmr
ENSMUSG00000042489	-1.04324	0.00170797	0.00761272	Clspn
ENSMUSG00000042510	1.13136	0.00449464	0.0170303	AA986860
ENSMUSG00000042541	1.18642	0.000525692	0.00283934	Sem1
ENSMUSG00000042647	-1.07702	1.88e-05	0.000165143	Acad12
ENSMUSG00000042688	1.00409	1.77e-05	0.000156289	Mapk6
ENSMUSG00000042707	-1.53857	0.0102171	0.0334718	Dnali1
ENSMUSG00000042708	-1.7625	0.00240126	0.0100947	Shcbp1l
ENSMUSG00000042712	1.27931	0.000151109	0.000982554	Tceal9
ENSMUSG00000042726	1.05431	6.72e-12	2.61e-10	Trafd1
ENSMUSG00000042745	1.13278	2.12e-05	0.00018314	Id1
ENSMUSG00000042766	-1.34869	0.000861064	0.00427971	Trim46
ENSMUSG00000042784	-1.04614	0.000883521	0.0043684	Muc1
ENSMUSG00000042810	-1.30048	0.000988568	0.00479925	Krba1
ENSMUSG00000042817	-2.17952	3.82e-08	6.75e-07	Flt3
ENSMUSG00000042821	1.00152	1.94e-06	2.26e-05	Snai1
ENSMUSG00000042918	-1.71653	0.000601752	0.00318476	Mamstr
ENSMUSG00000042961	-1.77157	0.00039697	0.00224481	Egflam
ENSMUSG00000043008	1.76092	6.65e-15	4.14e-13	Klhl6
ENSMUSG00000043015	-1.05592	0.000535669	0.00288555	Nemp2
ENSMUSG00000043036	1.469	8.66e-05	0.000613212	Ccdc63
ENSMUSG00000043051	-1.2233	0.000384943	0.00218462	Disc1
ENSMUSG00000043068	-1.25319	0.000192198	0.00120506	Fam89a
ENSMUSG00000043099	-2.66345	1.14e-12	4.95e-11	Hic1
ENSMUSG00000043110	1.27805	0.0141444	0.0435556	Lrrn4
ENSMUSG00000043183	-1.5897	0.00162829	0.00732421	Simc1
ENSMUSG00000043192	1.29559	0.000203171	0.00126304	Gm1840
ENSMUSG00000043243	-2.17758	1.46e-05	0.000131714	Fam129c
ENSMUSG00000043251	-1.48495	0.015841	0.0477665	Exoc3l
ENSMUSG00000043263	1.5829	1.1e-20	1.44e-18	Ifi209
ENSMUSG00000043279	1.31976	8.48e-13	3.77e-11	Trim56
ENSMUSG00000043286	3.12965	2.95e-11	9.93e-10	Pnpla1
ENSMUSG00000043415	-1.36402	8.36e-06	8.15e-05	Otud1
ENSMUSG00000043421	1.32855	8.67e-08	1.39e-06	Hilpda
ENSMUSG00000043557	-1.14359	0.000935111	0.00457097	Mdga1
ENSMUSG00000043664	-1.89612	1.12e-16	8.55e-15	Tmem221
ENSMUSG00000043873	3.79705	3.55e-06	3.85e-05	Chil5
ENSMUSG00000043881	1.33687	1.65e-07	2.52e-06	Kbtbd7
ENSMUSG00000043889	1.08735	4.38e-05	0.000339591	Gm8399
ENSMUSG00000044005	-2.16149	0.00658725	0.0233697	Gls2
ENSMUSG00000044017	1.00588	0.00733999	0.0254552	Adgrd1
ENSMUSG00000044037	-1.34488	7.6e-06	7.48e-05	Als2cl
ENSMUSG00000044092	-1.58348	2.82e-20	3.57e-18	C130050O18Rik
ENSMUSG00000044103	2.21291	7e-10	1.78e-08	Il1f9
ENSMUSG00000044156	-2.80091	6.5e-07	8.42e-06	Hepacam2
ENSMUSG00000044199	1.26802	9.77e-08	1.56e-06	S1pr4
ENSMUSG00000044229	-1.66481	0.000544655	0.00292582	Nxpe4
ENSMUSG00000044309	-4.02913	5.71e-28	2.32e-25	Apol7c
ENSMUSG00000044313	-1.95205	6.73e-05	0.000495724	Mab21l3
ENSMUSG00000044317	-1.60634	0.00684985	0.0241159	Gpr4
ENSMUSG00000044349	2.3636	5.08e-06	5.27e-05	Snhg11
ENSMUSG00000044390	-1.0558	0.0133079	0.0415103	Tigd3
ENSMUSG00000044453	-1.84769	0.00658457	0.0233697	Ffar1
ENSMUSG00000044551	-1.36904	0.000337349	0.00195016	9930012K11Rik
ENSMUSG00000044708	-2.15875	1.03e-09	2.54e-08	Kcnj10
ENSMUSG00000044719	1.60881	0.00520639	0.0191747	E230025N22Rik
ENSMUSG00000044734	1.60919	3.99e-06	4.26e-05	Serpinb1a
ENSMUSG00000044966	-1.50416	0.00315603	0.0126785	Fbxo48
ENSMUSG00000045038	1.20748	1.15e-08	2.25e-07	Prkce
ENSMUSG00000045087	-6.54151	2.21e-08	4.1e-07	S1pr5
ENSMUSG00000045103	-1.49082	0.00222109	0.00945477	Dmd
ENSMUSG00000045136	-1.29833	0.000172859	0.00110061	Tubb2b
ENSMUSG00000045287	-1.65205	0.014181	0.0436581	Rtn4rl1
ENSMUSG00000045322	-1.75806	1.33e-05	0.000122126	Tlr9
ENSMUSG00000045362	2.358	2.16e-18	2.06e-16	Tnfrsf26
ENSMUSG00000045502	1.04968	0.000238779	0.00144519	Hcar2
ENSMUSG00000045551	3.04214	3.22e-20	4.05e-18	Fpr1
ENSMUSG00000045625	-1.28351	0.000545216	0.00292698	Pigz
ENSMUSG00000045709	1.65885	0.000280885	0.00165278	Smkr-ps
ENSMUSG00000045725	-1.02704	0.00414756	0.0159362	Prr15
ENSMUSG00000045763	1.3213	2.54e-06	2.85e-05	Basp1
ENSMUSG00000045795	1.26823	1.09e-10	3.27e-09	Whamm
ENSMUSG00000045826	-1.39989	4.58e-06	4.8e-05	Ptprcap
ENSMUSG00000045868	1.30961	2.45e-05	0.000207202	Gvin1
ENSMUSG00000045930	-1.30371	0.00100825	0.00487316	Clec14a
ENSMUSG00000045932	2.20453	1.63e-17	1.34e-15	Ifit2
ENSMUSG00000045954	-1.03536	0.000688658	0.00355465	Cavin2
ENSMUSG00000046062	1.15853	5.21e-15	3.29e-13	Ppp1r15b
ENSMUSG00000046080	-3.07768	1.6e-20	2.06e-18	Clec9a
ENSMUSG00000046101	-2.0107	0.000641822	0.00336566	Mcmdc2
ENSMUSG00000046186	-2.66954	2.15e-05	0.000184936	Cd109
ENSMUSG00000046223	1.43664	5.55e-07	7.29e-06	Plaur
ENSMUSG00000046352	-2.68831	2.19e-06	2.52e-05	Gjb2
ENSMUSG00000046456	-1.29548	7.59e-07	9.64e-06	Tmem150b
ENSMUSG00000046463	-1.80894	9.57e-06	9.18e-05	5930403N24Rik
ENSMUSG00000046470	-1.49463	0.000272248	0.00160869	Sox18
ENSMUSG00000046487	-1.59263	0.0014946	0.00681348	Mospd4
ENSMUSG00000046668	-1.15777	0.00303359	0.0122564	Cxxc5
ENSMUSG00000046687	1.04422	0.000281106	0.00165278	Gm5424
ENSMUSG00000046748	5.31981	6.68e-18	5.97e-16	Tmem45a2
ENSMUSG00000046794	1.63593	1.08e-10	3.26e-09	Ppp1r3b
ENSMUSG00000046807	1.70396	5.07e-05	0.000386767	Lrrc75b
ENSMUSG00000046808	1.19404	2.38e-10	6.65e-09	Atp10d
ENSMUSG00000046834	2.13352	5.1e-06	5.28e-05	Krt1
ENSMUSG00000046841	2.0383	7.59e-11	2.33e-09	Ckap4
ENSMUSG00000046908	1.59022	8.16e-07	1.03e-05	Ltb4r1
ENSMUSG00000046997	1.52463	5.66e-06	5.8e-05	Spsb4
ENSMUSG00000047139	1.74999	1.39e-09	3.32e-08	Cd24a
ENSMUSG00000047228	1.88525	0.000476527	0.0026186	A2ml1
ENSMUSG00000047261	-3.13134	4.49e-05	0.000347759	Gap43
ENSMUSG00000047293	2.05415	5.68e-13	2.6e-11	Gpr15
ENSMUSG00000047415	1.26223	4.94e-08	8.48e-07	Gpr68
ENSMUSG00000047501	1.08658	0.000524771	0.00283652	Cldn4
ENSMUSG00000047515	-1.20102	0.0110103	0.0355538	BC049715
ENSMUSG00000047592	-2.8652	8.13e-16	5.66e-14	Nxpe5
ENSMUSG00000047631	2.93897	0.00186094	0.00816893	Apof
ENSMUSG00000047656	-1.5529	0.000491347	0.00268652	Trpt1
ENSMUSG00000047712	-1.11549	0.01049	0.0341531	Ust
ENSMUSG00000047735	2.28785	5.06e-25	1.28e-22	Samd9l
ENSMUSG00000047875	-1.3851	6.09e-08	1.02e-06	Gpr157
ENSMUSG00000047963	-1.27944	0.00409376	0.0157636	Stbd1
ENSMUSG00000048058	-1.37425	2.06e-07	3.07e-06	Ldlrad3
ENSMUSG00000048126	-2.00164	5e-07	6.66e-06	Col6a3
ENSMUSG00000048142	-1.85281	5.97e-06	6.04e-05	Nat8l
ENSMUSG00000048200	-1.38459	1.14e-05	0.000107109	Cracr2b
ENSMUSG00000048216	-1.60655	0.00848762	0.0286858	Gpr85
ENSMUSG00000048251	-1.63915	0.000767481	0.0038922	Rit1
ENSMUSG00000048329	2.18823	5.22e-06	5.39e-05	Mfsd6l
ENSMUSG00000048473	2.7488	3.17e-07	4.46e-06	Sult6b2
ENSMUSG00000048521	-1.22887	0.000433163	0.0024223	Cxcr6
ENSMUSG00000048537	-1.01137	0.000425711	0.00238549	Phldb1
ENSMUSG00000048721	1.70332	1.28e-14	7.62e-13	Fndc9
ENSMUSG00000048752	3.24521	2.25e-15	1.48e-13	Prss50
ENSMUSG00000048787	1.3324	4.99e-11	1.59e-09	Dcun1d3
ENSMUSG00000048824	-2.47734	0.000129586	0.000861785	Gm568
ENSMUSG00000048826	1.47462	0.0017738	0.00783484	Dact2
ENSMUSG00000048827	-1.24908	2.36e-05	0.000200268	Pkd1l3
ENSMUSG00000048834	-1.80056	4.3e-06	4.53e-05	Vstm2a
ENSMUSG00000048895	1.90048	0.00103997	0.00500773	Cdk5r1
ENSMUSG00000048905	-2.18869	0.00187236	0.00819879	4930539E08Rik
ENSMUSG00000048965	-1.09041	0.000551094	0.00295296	Mrgpre
ENSMUSG00000049086	-2.47322	3.47e-08	6.22e-07	Bmyc
ENSMUSG00000049119	-2.93561	1.19e-06	1.45e-05	Fam110b
ENSMUSG00000049265	-1.97633	0.00359334	0.0141945	Kcnk3
ENSMUSG00000049357	2.55796	0.000700677	0.00360751	4933408B17Rik
ENSMUSG00000049382	1.41616	1.81e-07	2.74e-06	Krt8
ENSMUSG00000049401	1.20279	3.14e-06	3.43e-05	Ogfr
ENSMUSG00000049409	1.38796	0.000171987	0.00109584	Prokr1
ENSMUSG00000049410	-2.31682	0.00140527	0.00646433	Zfp683
ENSMUSG00000049436	1.57686	0.00137975	0.00636963	Upk1b
ENSMUSG00000049491	-3.08125	4.11e-11	1.35e-09	Slc36a3
ENSMUSG00000049502	1.00071	1.12e-06	1.38e-05	Dtx3l
ENSMUSG00000049588	-1.33296	5.83e-06	5.94e-05	Ccdc69
ENSMUSG00000049658	1.25397	8.03e-08	1.3e-06	Bdp1
ENSMUSG00000049690	-1.72107	0.000718931	0.0036835	Nckap5
ENSMUSG00000049719	1.23304	6.93e-06	6.9e-05	Prss46
ENSMUSG00000049723	3.12108	4.97e-22	7.59e-20	Mmp12
ENSMUSG00000049848	-1.69674	1.36e-05	0.000124857	Ceacam19
ENSMUSG00000049866	-1.34632	4.12e-27	1.43e-24	Arl4c
ENSMUSG00000049871	-1.61703	1.08e-05	0.000101873	Nlrc3
ENSMUSG00000049881	-1.35582	1.69e-05	0.000150574	2810025M15Rik
ENSMUSG00000049892	1.2318	3.46e-05	0.000277281	Rasd1
ENSMUSG00000049897	1.25486	0.0023863	0.0100377	Stkld1
ENSMUSG00000049907	2.9225	6.42e-05	0.000475687	Rasl11b
ENSMUSG00000050022	-2.94126	1.7e-41	2.41e-38	Amz1
ENSMUSG00000050029	1.31575	2.4e-11	8.24e-10	Rap2c
ENSMUSG00000050103	-2.13182	3.43e-07	4.76e-06	Agmo
ENSMUSG00000050106	1.14684	2.32e-07	3.43e-06	Tmc8
ENSMUSG00000050108	2.44492	3.23e-08	5.82e-07	Bpifc
ENSMUSG00000050232	-1.51219	4.85e-05	0.000371253	Cxcr3
ENSMUSG00000050359	2.00437	9.47e-07	1.18e-05	Sprr1a
ENSMUSG00000050410	-1.41952	0.000105818	0.000726861	Tcf19
ENSMUSG00000050493	-2.35858	9.5e-07	1.18e-05	Fam167b
ENSMUSG00000050530	-1.69645	1.15e-05	0.000107466	Fam171a1
ENSMUSG00000050549	2.22506	4.13e-12	1.68e-10	Fam241a
ENSMUSG00000050578	1.34093	1.12e-05	0.000104925	Mmp13
ENSMUSG00000050600	-1.50252	3.51e-08	6.28e-07	Zfp831
ENSMUSG00000050675	-1.44835	0.0132601	0.041416	Gp1ba
ENSMUSG00000050697	1.06158	3.9e-12	1.59e-10	Prkaa1
ENSMUSG00000050737	2.43112	3.31e-19	3.41e-17	Ptges
ENSMUSG00000050751	-1.57031	0.00727659	0.0252941	Pgbd5
ENSMUSG00000050761	1.36015	0.00912329	0.0305076	Gp1bb
ENSMUSG00000050777	-1.40556	2.53e-06	2.85e-05	Tmem37
ENSMUSG00000050786	1.26238	3.67e-13	1.73e-11	Ccdc126
ENSMUSG00000050860	1.46431	4.28e-10	1.15e-08	Phospho1
ENSMUSG00000050896	2.29521	2.51e-05	0.000210788	Rtn4rl2
ENSMUSG00000050912	-1.05122	4.01e-06	4.27e-05	Tmem123
ENSMUSG00000050914	2.33777	4.55e-14	2.45e-12	Ankrd37
ENSMUSG00000050919	-2.1769	0.000900843	0.00443398	Zfp366
ENSMUSG00000050931	1.36927	4.19e-05	0.000328336	Sgms2
ENSMUSG00000050953	2.5756	1.26e-18	1.22e-16	Gja1
ENSMUSG00000050965	-1.02888	0.00158227	0.00714661	Prkca
ENSMUSG00000050966	2.5454	1.54e-09	3.65e-08	Lin28a
ENSMUSG00000050967	-1.53431	5.96e-13	2.7e-11	Creg2
ENSMUSG00000051043	-2.38512	1.1e-05	0.000103743	Gprc5c
ENSMUSG00000051107	-1.10158	2.53e-05	0.000211989	NA
ENSMUSG00000051124	2.36735	3.28e-09	7.24e-08	Gimap9
ENSMUSG00000051147	1.01497	0.000337983	0.00195016	Nat2
ENSMUSG00000051169	-1.69225	0.00172272	0.00766405	Rpusd3
ENSMUSG00000051177	-1.4238	3.55e-05	0.000284091	Plcb1
ENSMUSG00000051212	-1.4956	0.000360892	0.00206713	Gpr183
ENSMUSG00000051278	-1.25515	0.00224651	0.0095458	Zgrf1
ENSMUSG00000051316	1.18992	3.74e-05	0.000297306	Taf7
ENSMUSG00000051335	-1.87623	3.64e-09	7.94e-08	Gfod1
ENSMUSG00000051339	-1.74016	1.03e-06	1.28e-05	2900026A02Rik
ENSMUSG00000051341	1.29022	1.04e-11	3.84e-10	Zfp52
ENSMUSG00000051359	-1.01293	0.00976916	0.0322798	Ncald
ENSMUSG00000051379	1.18709	0.00138529	0.00638897	Flrt3
ENSMUSG00000051439	1.5235	2.29e-06	2.62e-05	Cd14
ENSMUSG00000051503	-2.83251	0.000192087	0.00120506	Gm6583
ENSMUSG00000051504	-3.7845	4.8e-08	8.29e-07	Siglech
ENSMUSG00000051515	1.82449	0.00189949	0.00829966	Fam181b
ENSMUSG00000051517	-1.59124	3.22e-05	0.000261183	Arhgef39
ENSMUSG00000051648	1.43173	0.00420615	0.0161004	Kctd19
ENSMUSG00000051650	1.09251	0.00013164	0.000872988	B3gnt2
ENSMUSG00000051652	-2.59403	1.82e-09	4.26e-08	Lrrc3
ENSMUSG00000051669	-1.40449	0.000499087	0.00272465	AU021092
ENSMUSG00000051682	-1.43032	6e-08	1.01e-06	Treml4
ENSMUSG00000051703	-1.70753	7.87e-05	0.000565113	Tmem198
ENSMUSG00000051727	-4.35229	7.93e-07	1e-05	Kctd14
ENSMUSG00000051748	2.48349	0.000635768	0.0033399	Wfdc21
ENSMUSG00000051811	-1.73052	0.000128426	0.000856071	Cox6b2
ENSMUSG00000051851	-1.39663	1.76e-05	0.000155732	Rtl8c
ENSMUSG00000051977	-1.2271	0.000426738	0.00239031	Prdm9
ENSMUSG00000051998	-1.16023	0.0108835	0.0352245	Lax1
ENSMUSG00000052013	-1.18372	0.00438606	0.0166767	Btla
ENSMUSG00000052142	-1.03099	0.000159596	0.00102768	Rasal3
ENSMUSG00000052160	-1.70957	2.88e-33	1.95e-30	Pld4
ENSMUSG00000052212	3.36048	4.43e-05	0.000343685	Cd177
ENSMUSG00000052270	1.95968	3.41e-14	1.88e-12	Fpr2
ENSMUSG00000052336	-3.90175	2.17e-57	3.08e-53	Cx3cr1
ENSMUSG00000052374	-2.64368	5.21e-05	0.000395919	Actn2
ENSMUSG00000052407	-1.62682	0.000233874	0.00141913	Ccdc171
ENSMUSG00000052435	1.01259	4.6e-05	0.000354632	Cebpe
ENSMUSG00000052477	1.17031	0.000172032	0.00109584	C130026I21Rik
ENSMUSG00000052688	-1.27168	4.14e-12	1.68e-10	Rab7b
ENSMUSG00000052776	1.1756	2.28e-09	5.2e-08	Oas1a
ENSMUSG00000052914	-2.11524	0.000134549	0.000889784	Cyp2j6
ENSMUSG00000052921	-1.12475	0.00448103	0.0169877	Arhgef15
ENSMUSG00000052942	2.45688	2.41e-19	2.55e-17	Glis3
ENSMUSG00000052974	-1.08723	2.38e-07	3.48e-06	Cyp2f2
ENSMUSG00000053030	-1.37368	5.26e-10	1.38e-08	Spink2
ENSMUSG00000053044	-1.80309	0.000136257	0.000897742	Cd8b1
ENSMUSG00000053101	1.46162	2.32e-13	1.12e-11	Gpr141
ENSMUSG00000053219	1.62434	7.47e-09	1.52e-07	Raet1e
ENSMUSG00000053338	2.62986	5.81e-20	6.99e-18	Tarm1
ENSMUSG00000053411	-1.05124	0.000489595	0.00267901	Cbx7
ENSMUSG00000053442	1.9629	0.000272085	0.00160839	4930597O21Rik
ENSMUSG00000053469	1.63775	0.000225993	0.00138134	Tg
ENSMUSG00000053470	1.17312	5.79e-18	5.23e-16	Kdm3a
ENSMUSG00000053475	1.18431	0.000169297	0.00108181	Tnfaip6
ENSMUSG00000053553	-1.04315	0.000212105	0.00130884	3110082I17Rik
ENSMUSG00000053559	-1.22134	1.45e-05	0.00013124	Smagp
ENSMUSG00000053580	-1.35417	2.51e-07	3.64e-06	Tanc2
ENSMUSG00000053617	-1.15648	1.02e-06	1.26e-05	Sh3pxd2a
ENSMUSG00000053646	-1.25126	0.00421304	0.016118	Plxnb1
ENSMUSG00000053647	-3.55061	7.58e-05	0.000547506	Gper1
ENSMUSG00000053846	3.14612	1.06e-32	6.56e-30	Lipg
ENSMUSG00000053957	-1.32394	0.00462639	0.0174272	Gm12474
ENSMUSG00000053965	-1.60516	2.12e-06	2.45e-05	Pde5a
ENSMUSG00000054072	1.30558	5.01e-07	6.66e-06	Iigp1
ENSMUSG00000054091	1.04437	0.000311908	0.00181808	1810037I17Rik
ENSMUSG00000054169	2.53328	7.38e-11	2.28e-09	Ceacam10
ENSMUSG00000054200	-1.60453	4.8e-08	8.29e-07	Ffar4
ENSMUSG00000054203	1.23992	1.55e-05	0.000138864	Ifi205
ENSMUSG00000054263	1.70472	2.9e-14	1.63e-12	Lifr
ENSMUSG00000054404	1.21376	8.55e-08	1.37e-06	Slfn5
ENSMUSG00000054422	-5.32463	5.6e-09	1.18e-07	Fabp1
ENSMUSG00000054517	-1.48139	1.82e-09	4.26e-08	Trim65
ENSMUSG00000054580	-2.95823	1.2e-05	0.000111143	Pla2r1
ENSMUSG00000054582	1.63572	0.000211613	0.00130694	Pabpc1l
ENSMUSG00000054675	1.68403	8e-21	1.07e-18	Tmem119
ENSMUSG00000054690	-1.21747	0.015086	0.0458691	Emcn
ENSMUSG00000054733	1.64882	2.79e-06	3.1e-05	Msra
ENSMUSG00000054855	1.38504	2.58e-07	3.72e-06	Rnd1
ENSMUSG00000054893	-1.59048	2.33e-06	2.66e-05	Zfp667
ENSMUSG00000054986	-1.17455	0.000460328	0.00254632	Sec14l3
ENSMUSG00000055044	-2.25822	1.56e-27	5.99e-25	Pdlim1
ENSMUSG00000055296	-1.04493	0.000200369	0.00124725	Tmem245
ENSMUSG00000055322	-1.11269	2.09e-07	3.12e-06	Tns1
ENSMUSG00000055447	1.12234	2.56e-08	4.68e-07	Cd47
ENSMUSG00000055485	-1.75101	3.58e-09	7.84e-08	Soga1
ENSMUSG00000055493	-1.22953	1.86e-06	2.17e-05	Epm2a
ENSMUSG00000055555	-3.31812	0.000922618	0.00451768	4930502E18Rik
ENSMUSG00000055633	1.09519	0.00261918	0.0108708	Zfp580
ENSMUSG00000055639	3.03064	8.23e-20	9.28e-18	Dach1
ENSMUSG00000055692	-1.08438	0.0128854	0.040493	Tmem191c
ENSMUSG00000055717	-1.68341	1.93e-05	0.000167968	Slain1
ENSMUSG00000055745	-1.27237	2.04e-05	0.000176898	Rtl6
ENSMUSG00000055805	1.06341	1.07e-10	3.21e-09	Fmnl1
ENSMUSG00000055809	-2.43891	9.74e-23	1.73e-20	Dnaaf3
ENSMUSG00000055866	1.44771	2.15e-16	1.59e-14	Per2
ENSMUSG00000055978	-2.77082	1.49e-06	1.78e-05	Fut2
ENSMUSG00000056054	2.82842	9.14e-06	8.79e-05	S100a8
ENSMUSG00000056055	-1.38141	0.00341764	0.0135822	Sag
ENSMUSG00000056069	-1.61029	8.01e-26	2.27e-23	Fam105a
ENSMUSG00000056071	2.28218	0.000138453	0.000911785	S100a9
ENSMUSG00000056133	-2.12408	0.000190665	0.00119735	Gm9992
ENSMUSG00000056185	-1.0495	0.000728092	0.00372168	Snx32
ENSMUSG00000056313	-1.73334	3.51e-07	4.86e-06	Tcim
ENSMUSG00000056367	-2.41261	0.00521525	0.0191974	Actr3b
ENSMUSG00000056427	1.88411	8.2e-09	1.65e-07	Slit3
ENSMUSG00000056501	1.06558	0.0040248	0.0155486	Cebpb
ENSMUSG00000056643	1.00336	0.00254943	0.0106264	Chst13
ENSMUSG00000056656	-1.68537	1.53e-05	0.000137255	Apol8
ENSMUSG00000056962	1.00447	6.43e-07	8.37e-06	Jmjd6
ENSMUSG00000056973	-1.3124	9.04e-06	8.71e-05	Ces1d
ENSMUSG00000057058	-1.16239	0.000124265	0.000833815	Skap1
ENSMUSG00000057137	1.12026	1.66e-13	8.25e-12	Tmem140
ENSMUSG00000057337	-1.66509	0.000655578	0.00342119	Chst3
ENSMUSG00000057359	1.96086	2.35e-07	3.46e-06	Gm17494
ENSMUSG00000057400	6.38136	0.0113157	0.0363912	Ces1c
ENSMUSG00000057440	2.01994	1.33e-05	0.000122126	Mpp7
ENSMUSG00000057465	4.90477	0.00130904	0.00608869	Saa2
ENSMUSG00000057614	-2.44861	0.000631552	0.00332176	Gnai1
ENSMUSG00000057666	1.08064	2.55e-08	4.68e-07	Gapdh
ENSMUSG00000057722	-1.62095	3.92e-08	6.89e-07	Lepr
ENSMUSG00000057729	2.27953	4.3e-09	9.22e-08	Prtn3
ENSMUSG00000057762	1.51879	0.0119304	0.0380236	Gm6169
ENSMUSG00000057897	-2.13217	5.24e-08	8.96e-07	Camk2b
ENSMUSG00000057914	-3.67855	0.000239047	0.00144619	Cacnb2
ENSMUSG00000058022	1.62739	0.000470274	0.00259024	Adtrp
ENSMUSG00000058056	1.1027	9.29e-09	1.86e-07	Palld
ENSMUSG00000058207	5.76656	0.0040748	0.0157076	Serpina3k
ENSMUSG00000058325	-1.52252	2.17e-10	6.14e-09	Dock1
ENSMUSG00000058385	-1.79344	0.00144753	0.00663297	Hist1h2bg
ENSMUSG00000058392	-1.11883	1.26e-05	0.000116496	Rrp1b
ENSMUSG00000058427	1.21509	0.000473825	0.00260816	Cxcl2
ENSMUSG00000058435	-1.16721	1.92e-06	2.23e-05	Btnl4
ENSMUSG00000058728	-4.83779	1.85e-05	0.000162627	Cd300c
ENSMUSG00000058761	1.56179	5.75e-11	1.81e-09	Rnf169
ENSMUSG00000058794	1.38059	1.73e-05	0.000153836	Nfe2
ENSMUSG00000058975	-2.03418	0.00529432	0.019428	Kcnc1
ENSMUSG00000059040	1.8894	7.56e-06	7.45e-05	Eno1b
ENSMUSG00000059108	3.83121	1.15e-05	0.000107672	Ifitm6
ENSMUSG00000059119	1.12941	4.14e-07	5.61e-06	Nap1l4
ENSMUSG00000059256	4.99397	6.95e-07	8.94e-06	Gzmd
ENSMUSG00000059316	1.6722	2.27e-09	5.19e-08	Slc27a4
ENSMUSG00000059610	-2.20734	0.00569174	0.0206569	Olfr222
ENSMUSG00000059639	-3.25064	1.44e-05	0.00013065	Clec4a4
ENSMUSG00000059657	3.22852	0.000159482	0.00102741	Stfa2l1
ENSMUSG00000059714	1.05464	0.00040294	0.00227494	Flot1
ENSMUSG00000059824	-1.0676	0.00462159	0.0174183	Dbp
ENSMUSG00000059900	1.86374	0.00455114	0.0172168	Tmem40
ENSMUSG00000059995	1.07036	8.17e-11	2.5e-09	Atxn7l3
ENSMUSG00000060044	-1.44094	0.00822311	0.0279381	Tmem26
ENSMUSG00000060063	1.92831	3.64e-08	6.47e-07	Alox5ap
ENSMUSG00000060131	1.08121	6.34e-10	1.62e-08	Atp8b4
ENSMUSG00000060183	1.05103	2.29e-11	7.92e-10	Cxcl11
ENSMUSG00000060224	-1.90745	2.42e-06	2.74e-05	Pyroxd2
ENSMUSG00000060429	-1.57736	0.00165896	0.00743089	Sntb1
ENSMUSG00000060470	1.87628	1.47e-17	1.22e-15	Adgrg3
ENSMUSG00000060586	-1.57961	6.19e-23	1.13e-20	H2-Eb1
ENSMUSG00000060600	-1.46733	5.56e-11	1.76e-09	Eno3
ENSMUSG00000060639	-1.06016	0.000207198	0.00128358	Hist1h4i
ENSMUSG00000060743	1.08841	1.49e-07	2.3e-06	H3f3a
ENSMUSG00000060981	-1.07175	0.00999187	0.0329006	Hist1h4h
ENSMUSG00000061013	-1.96588	0.000216514	0.0013297	Mkx
ENSMUSG00000061048	2.48611	1.55e-06	1.85e-05	Cdh3
ENSMUSG00000061100	1.43592	2.45e-05	0.000206874	Retnla
ENSMUSG00000061132	-1.6986	2.99e-26	9.43e-24	Blnk
ENSMUSG00000061143	-1.38661	3.49e-05	0.000280327	Maml3
ENSMUSG00000061397	-2.53789	1.04e-20	1.39e-18	Krt79
ENSMUSG00000061411	-1.61669	7.38e-13	3.3e-11	Nol4l
ENSMUSG00000061540	1.28963	0.000488543	0.00267537	Orm2
ENSMUSG00000061577	-2.68014	1.08e-07	1.7e-06	Adgrg5
ENSMUSG00000061578	-2.31106	5.35e-10	1.4e-08	Ksr2
ENSMUSG00000061758	-1.15451	3.9e-12	1.59e-10	Akr1b10
ENSMUSG00000061808	8.31344	0.00321847	0.0128857	Ttr
ENSMUSG00000061815	-1.39666	4.77e-05	0.00036579	Rufy4
ENSMUSG00000061825	-4.01729	7.58e-10	1.91e-08	Ces2c
ENSMUSG00000061859	-2.38336	1.58e-14	9.3e-13	Patj
ENSMUSG00000061878	2.75444	2.24e-12	9.42e-11	Sphk1
ENSMUSG00000061981	1.38453	7.3e-09	1.49e-07	Flot2
ENSMUSG00000062070	1.18022	3.14e-10	8.65e-09	Pgk1
ENSMUSG00000062081	1.0231	0.0116489	0.0372705	Gm6055
ENSMUSG00000062098	-1.10862	0.000266599	0.00158255	Btbd3
ENSMUSG00000062115	-1.01267	0.000818125	0.00410299	Rai1
ENSMUSG00000062148	2.96108	4.44e-19	4.44e-17	Ear6
ENSMUSG00000062157	1.13985	8.49e-07	1.07e-05	Ifnlr1
ENSMUSG00000062310	1.32476	0.00025713	0.00153339	Glrp1
ENSMUSG00000062345	2.54795	0.000534485	0.00288026	Serpinb2
ENSMUSG00000062380	2.42056	5.93e-10	1.53e-08	Tubb3
ENSMUSG00000062488	1.78973	1.8e-08	3.39e-07	Ifit3b
ENSMUSG00000062515	-1.01642	0.000122629	0.000826351	Fabp4
ENSMUSG00000062545	-2.20371	1.58e-35	1.2e-32	Tlr12
ENSMUSG00000062901	1.06212	4.37e-09	9.36e-08	Klhl24
ENSMUSG00000062906	-1.38832	2.32e-06	2.65e-05	Hdac10
ENSMUSG00000062960	-1.08319	2.83e-05	0.000233181	Kdr
ENSMUSG00000062980	1.11118	1.22e-06	1.48e-05	Cped1
ENSMUSG00000063193	-1.42898	4.61e-12	1.84e-10	Cd300lb
ENSMUSG00000063229	1.48872	6.63e-13	2.98e-11	Ldha
ENSMUSG00000063234	1.16327	1.09e-05	0.000102444	Gpr84
ENSMUSG00000063268	1.46286	5.28e-10	1.38e-08	Parp10
ENSMUSG00000063286	1.44755	2.68e-09	6.05e-08	Gm8995
ENSMUSG00000063388	2.07395	1.83e-07	2.77e-06	BC023105
ENSMUSG00000063410	1.00253	1.97e-06	2.29e-05	Stk24
ENSMUSG00000063455	1.88598	0.00322371	0.0128994	D630045J12Rik
ENSMUSG00000063458	2.34591	4.38e-12	1.76e-10	Lrmda
ENSMUSG00000063506	-2.09482	6.8e-16	4.81e-14	Arhgap22
ENSMUSG00000063522	-1.90811	0.00841497	0.0284606	2010109I03Rik
ENSMUSG00000063531	-1.49948	4.36e-05	0.000338863	Sema3e
ENSMUSG00000063535	1.96063	1.73e-06	2.04e-05	Zfp773
ENSMUSG00000063600	1.43048	0.000751515	0.00382763	Egfem1
ENSMUSG00000063605	-1.93366	4.31e-11	1.41e-09	Ccdc102a
ENSMUSG00000063628	1.75249	1.01e-06	1.25e-05	Gm7665
ENSMUSG00000063646	-1.03728	0.00413178	0.0158927	Jakmip1
ENSMUSG00000063810	-1.48112	0.00396679	0.0153705	Alms1
ENSMUSG00000063873	2.37437	6.97e-08	1.15e-06	Slc24a3
ENSMUSG00000064023	-1.74841	0.000300273	0.00175674	Klk8
ENSMUSG00000064043	-1.37493	5.6e-07	7.35e-06	Trerf1
ENSMUSG00000064061	-1.00784	0.0103625	0.0338084	Dzip3
ENSMUSG00000064080	1.82469	1.87e-11	6.59e-10	Fbln2
ENSMUSG00000064181	1.31005	1.04e-12	4.58e-11	Rab3ip
ENSMUSG00000064193	1.11895	0.00945897	0.0314371	Gm4735
ENSMUSG00000064246	1.32146	6.53e-09	1.35e-07	Chil1
ENSMUSG00000064280	-1.32591	0.000499643	0.00272515	Ccdc146
ENSMUSG00000064294	1.71138	0.00083278	0.00416132	Aox3
ENSMUSG00000064336	1.60661	4.35e-05	0.000338863	mt-Tf
ENSMUSG00000064340	1.78145	9.88e-12	3.65e-10	mt-Tl1
ENSMUSG00000064351	1.13345	8.5e-08	1.37e-06	mt-Co1
ENSMUSG00000064354	1.06417	0.000120434	0.000815038	mt-Co2
ENSMUSG00000064357	1.32671	0.00175985	0.00779018	mt-Atp6
ENSMUSG00000064360	4.4761	3.25e-07	4.56e-06	mt-Nd3
ENSMUSG00000064368	1.37622	2.36e-06	2.69e-05	mt-Nd6
ENSMUSG00000064370	1.05288	0.000921701	0.00451474	mt-Cytb
ENSMUSG00000064372	1.04165	0.000118025	0.000801461	mt-Tp
ENSMUSG00000065258	-1.73422	0.00709385	0.0247831	Gm23969
ENSMUSG00000065537	-2.54726	0.0049209	0.0183324	Mir132
ENSMUSG00000065541	-2.25193	0.000100703	0.000700192	Mir24-2
ENSMUSG00000065601	-2.43957	0.00349478	0.0138437	Mir146
ENSMUSG00000066026	-1.82414	2.31e-11	8e-10	Dhrs3
ENSMUSG00000066108	-1.43726	2.05e-05	0.000177969	Muc5b
ENSMUSG00000066150	1.29026	4.67e-15	2.97e-13	Slc31a1
ENSMUSG00000066170	1.56022	0.0153631	0.0465911	E230001N04Rik
ENSMUSG00000066235	-1.91472	0.000957652	0.00466671	Pomgnt2
ENSMUSG00000066258	1.00849	2.5e-07	3.64e-06	Trim12a
ENSMUSG00000066357	-1.06464	3.39e-06	3.69e-05	Wdr6
ENSMUSG00000066363	2.36109	3.89e-38	4.25e-35	Serpina3f
ENSMUSG00000066441	1.03644	2.23e-07	3.31e-06	Rdh11
ENSMUSG00000066647	-1.0503	0.0136912	0.0424637	Gm5113
ENSMUSG00000066677	4.09264	0.00191993	0.00836839	Pydc3
ENSMUSG00000066800	1.74496	2.69e-14	1.54e-12	Rnasel
ENSMUSG00000066829	-1.21109	0.000342049	0.00197032	Zfp810
ENSMUSG00000066861	1.3617	2.36e-10	6.6e-09	Oas1g
ENSMUSG00000066877	-1.00008	3.68e-05	0.000292872	Nck2
ENSMUSG00000066894	-1.73052	8.05e-12	3.05e-10	Vsig10
ENSMUSG00000066975	-1.54751	3.09e-05	0.000251495	Cryba4
ENSMUSG00000067049	-2.18915	1.09e-05	0.000102999	Unc93a
ENSMUSG00000067341	-1.85096	2.83e-05	0.000233227	H2-Eb2
ENSMUSG00000067547	1.10019	0.00489077	0.0182468	Gm7666
ENSMUSG00000067591	-1.56945	0.0064203	0.0228916	Klra3
ENSMUSG00000067599	-2.78776	0.000418605	0.00235124	Klra7
ENSMUSG00000067642	-2.35143	1.36e-05	0.000124424	Adgrf3
ENSMUSG00000067714	-2.27764	6.43e-07	8.37e-06	Lpar5
ENSMUSG00000067787	1.84368	9.33e-20	1.04e-17	Blcap
ENSMUSG00000067851	1.05868	1.99e-10	5.65e-09	Arfgef1
ENSMUSG00000067889	-1.66957	0.000820168	0.00410807	Sptbn2
ENSMUSG00000068105	-2.32249	0.000663081	0.00345147	Tnfrsf13c
ENSMUSG00000068245	1.39809	2.22e-15	1.47e-13	Phf11d
ENSMUSG00000068246	1.02934	0.00211379	0.00909341	Apol9b
ENSMUSG00000068551	-1.04831	6.57e-05	0.000485537	Zfp467
ENSMUSG00000068587	1.70554	3.89e-10	1.05e-08	Mgam
ENSMUSG00000068606	2.16155	3.29e-18	3.03e-16	Gm4841
ENSMUSG00000068744	-1.6691	0.000189886	0.00119351	Psrc1
ENSMUSG00000068923	-1.41393	7.51e-11	2.31e-09	Syt11
ENSMUSG00000069114	-1.50376	1.56e-07	2.4e-06	Zbtb10
ENSMUSG00000069237	1.23164	3.22e-08	5.79e-07	Fam8a1
ENSMUSG00000069270	-2.23508	0.00187093	0.00819815	Hist1h2ac
ENSMUSG00000069305	-1.62006	0.00169425	0.00755629	Hist1h4n
ENSMUSG00000069515	-2.31851	7.4e-18	6.57e-16	Lyz1
ENSMUSG00000069516	-1.21696	8.58e-09	1.72e-07	Lyz2
ENSMUSG00000069763	-1.35615	0.00130834	0.00608743	Tmem100
ENSMUSG00000069792	2.07681	0.00061979	0.00327169	Wfdc17
ENSMUSG00000069830	-1.14351	7.47e-05	0.000540351	Nlrp1a
ENSMUSG00000069873	2.38333	1.4e-07	2.18e-06	4930438A08Rik
ENSMUSG00000070031	1.19282	1.49e-07	2.3e-06	Sp140
ENSMUSG00000070323	1.55212	0.000250719	0.00150273	Mmp27
ENSMUSG00000070369	-2.52236	7.8e-05	0.000560785	Itgad
ENSMUSG00000070371	-1.76522	4e-05	0.000315597	Prss36
ENSMUSG00000070390	-1.93772	3.19e-12	1.33e-10	Nlrp1b
ENSMUSG00000070498	-2.46677	0.000523734	0.00283199	Tmem132b
ENSMUSG00000070501	1.38132	9.63e-05	0.000672196	Ifi214
ENSMUSG00000070529	-5.20958	6.17e-06	6.21e-05	Wfdc10
ENSMUSG00000070565	-1.00927	0.00278985	0.0114504	Rasal2
ENSMUSG00000070737	-1.14359	1.38e-05	0.000126275	Tmem35b
ENSMUSG00000070868	-7.19793	5.56e-11	1.76e-09	Skint3
ENSMUSG00000071042	-2.08316	1.84e-06	2.15e-05	Rasgrp3
ENSMUSG00000071068	1.14397	2.98e-09	6.63e-08	Treml2
ENSMUSG00000071177	8.30178	0.00567723	0.0206095	Serpina1d
ENSMUSG00000071178	5.0697	0.000224291	0.00137153	Serpina1b
ENSMUSG00000071226	-2.22892	0.00087979	0.0043545	Cecr2
ENSMUSG00000071311	-1.76064	0.000185038	0.00116873	Gpr31b
ENSMUSG00000071561	3.89653	0.00559782	0.0203681	BC100530
ENSMUSG00000071562	3.73164	0.000490665	0.00268382	Stfa1
ENSMUSG00000071604	-1.18961	8.06e-07	1.02e-05	Fam189a2
ENSMUSG00000071669	-1.31017	2.16e-08	4.02e-07	Snx29
ENSMUSG00000072214	2.42778	1.37e-14	8.11e-13	2021-09-05
ENSMUSG00000072437	-1.57243	0.000279591	0.00164796	Nanos1
ENSMUSG00000072596	-1.46797	1.3e-10	3.83e-09	Ear2
ENSMUSG00000072601	-2.42371	1.33e-23	2.87e-21	Ear1
ENSMUSG00000072620	1.31738	5.83e-06	5.94e-05	Slfn2
ENSMUSG00000072663	2.27524	7.51e-16	5.26e-14	Spef2
ENSMUSG00000072683	3.17366	0.010312	0.0336896	Gm7457
ENSMUSG00000072694	1.13539	0.000290829	0.001705	1500011B03Rik
ENSMUSG00000072844	2.14932	1.65e-08	3.14e-07	G530011O06Rik
ENSMUSG00000072872	1.19262	6.67e-07	8.63e-06	Rybp
ENSMUSG00000072875	3.38027	0.000620347	0.00327341	Gpr27
ENSMUSG00000073412	-1.46213	8.92e-12	3.34e-10	Lst1
ENSMUSG00000073414	1.55528	0.00532768	0.0195202	Mpig6b
ENSMUSG00000073420	-2.01709	4.74e-14	2.54e-12	Btnl5-ps
ENSMUSG00000073421	-1.18055	1.97e-13	9.66e-12	H2-Ab1
ENSMUSG00000073427	-1.43003	0.011374	0.0365536	Gm4924
ENSMUSG00000073489	1.88315	4.92e-19	4.89e-17	Ifi204
ENSMUSG00000073491	1.61531	5.16e-24	1.16e-21	Ifi213
ENSMUSG00000073492	-1.0859	0.0045688	0.0172627	Gm10521
ENSMUSG00000073538	-1.72906	0.00291753	0.011892	E330020D12Rik
ENSMUSG00000073555	1.75073	1.04e-16	7.99e-15	Gm4951
ENSMUSG00000073600	-2.01733	0.00987282	0.0325844	Prob1
ENSMUSG00000073739	-1.68533	0.0107554	0.0349134	Gm16287
ENSMUSG00000073792	-1.0346	0.000408647	0.00230351	Alg6
ENSMUSG00000073902	1.03549	0.000410294	0.00231096	Gm1966
ENSMUSG00000074001	-2.56643	0.00511712	0.0189195	Klhl40
ENSMUSG00000074071	2.94438	3.5e-06	3.8e-05	Fam169b
ENSMUSG00000074115	2.84341	0.00779626	0.0267373	Saa1
ENSMUSG00000074149	-3.1297	0.000146361	0.000956083	Gm10634
ENSMUSG00000074217	-4.27796	0.000269615	0.00159712	2210011C24Rik
ENSMUSG00000074240	-1.56659	0.00965872	0.0319744	Cib3
ENSMUSG00000074259	1.33254	0.000157779	0.00101736	Gramd2
ENSMUSG00000074280	-1.69171	0.000510229	0.00277268	Gm6166
ENSMUSG00000074361	-1.28266	6.61e-10	1.69e-08	C5ar2
ENSMUSG00000074417	2.04601	1.35e-22	2.32e-20	Gm14548
ENSMUSG00000074500	1.71085	0.000309952	0.00180964	Zfp558
ENSMUSG00000074505	-2.35806	0.00339524	0.0135096	Fat3
ENSMUSG00000074604	2.13422	2.68e-08	4.89e-07	Mgst2
ENSMUSG00000074657	-2.05658	0.00349153	0.0138346	Kif5a
ENSMUSG00000074743	1.10474	4.65e-07	6.21e-06	Thbd
ENSMUSG00000074746	1.13131	1.55e-09	3.66e-08	Pdzd8
ENSMUSG00000074783	-1.70659	0.00245639	0.0102929	AU019990
ENSMUSG00000074794	-1.04483	1.18e-05	0.000109745	Arrdc3
ENSMUSG00000074805	-1.69036	5.39e-07	7.11e-06	Il1bos
ENSMUSG00000074813	1.709	1.51e-09	3.57e-08	Gm14005
ENSMUSG00000074874	1.26975	3.65e-05	0.00029115	Ctla2b
ENSMUSG00000074896	1.99193	3.63e-11	1.21e-09	Ifit3
ENSMUSG00000074934	-1.13488	0.00952487	0.0315853	Grem1
ENSMUSG00000074971	-2.59109	0.00398226	0.0154178	Fibin
ENSMUSG00000075010	1.08826	3.67e-14	2e-12	AW112010
ENSMUSG00000075031	-2.64217	5.04e-05	0.000384765	Hist1h2bb
ENSMUSG00000075289	-1.4251	2.07e-06	2.39e-05	Carns1
ENSMUSG00000075297	-1.57688	0.0026553	0.0110031	H60b
ENSMUSG00000075585	-1.08462	6.07e-05	0.00045215	6330403L08Rik
ENSMUSG00000076431	1.54987	3.9e-08	6.87e-07	Sox4
ENSMUSG00000076501	-1.87845	0.0111126	0.0358271	Igkv2-137
ENSMUSG00000076545	3.74464	0.00799023	0.0273431	Igkv4-72
ENSMUSG00000076569	2.03988	0.00302173	0.012222	Igkv5-39
ENSMUSG00000076577	2.38003	0.00893112	0.0299496	Igkv8-30
ENSMUSG00000076583	2.72963	0.00778174	0.0267133	Igkv8-24
ENSMUSG00000076612	2.64629	0.000752321	0.00382899	Ighg2c
ENSMUSG00000076613	2.21741	0.00789408	0.0270467	Ighg2b
ENSMUSG00000076672	2.44536	5.67e-05	0.000427202	Ighv3-6
ENSMUSG00000076677	1.98772	0.0141953	0.0436743	Ighv6-3
ENSMUSG00000076749	-3.76307	9.45e-09	1.88e-07	Tcrg-C1
ENSMUSG00000076752	-1.79143	0.00177486	0.00783707	Tcrg-C2
ENSMUSG00000076867	-3.0548	0.000139552	0.000918601	Trdv4
ENSMUSG00000076934	2.99263	0.000656424	0.00342435	Iglv1
ENSMUSG00000078122	1.0506	4.03e-05	0.000318014	F630028O10Rik
ENSMUSG00000078127	-2.71895	0.000862391	0.00428481	Fam170b
ENSMUSG00000078144	1.22266	6.84e-05	0.000502334	Capns2
ENSMUSG00000078238	1.1474	0.000369659	0.00211053	Gm12854
ENSMUSG00000078349	-1.00354	1.15e-05	0.000107787	AW011738
ENSMUSG00000078354	-6.03378	4.13e-05	0.000324291	Ifna2
ENSMUSG00000078490	-1.35296	0.0125262	0.0396204	Cfap74
ENSMUSG00000078566	1.87363	2.23e-21	3.19e-19	Bnip3
ENSMUSG00000078606	1.69484	1.16e-07	1.82e-06	Gm4070
ENSMUSG00000078616	1.19071	0.000241987	0.00146087	Trim30c
ENSMUSG00000078700	-2.2241	6.24e-07	8.15e-06	D030028A08Rik
ENSMUSG00000078716	-1.2051	0.000511049	0.00277502	Tmem8b
ENSMUSG00000078763	1.62728	1.28e-08	2.49e-07	Slfn1
ENSMUSG00000078780	-2.51886	1.58e-23	3.36e-21	Gm5150
ENSMUSG00000078816	-2.68315	1.09e-09	2.67e-08	Prkcg
ENSMUSG00000078861	-1.3818	0.00154227	0.00699486	Zfp931
ENSMUSG00000078920	1.28357	1.96e-09	4.57e-08	Ifi47
ENSMUSG00000078921	1.35592	7.14e-16	5.02e-14	Tgtp2
ENSMUSG00000078922	1.87381	1.28e-15	8.67e-14	Tgtp1
ENSMUSG00000078994	1.27027	9.34e-08	1.49e-06	Zfp429
ENSMUSG00000079012	3.77225	6.06e-07	7.93e-06	Serpina3m
ENSMUSG00000079014	1.27831	0.000318483	0.00185033	Serpina3i
ENSMUSG00000079015	8.80286	0.00465905	0.0175316	Serpina1c
ENSMUSG00000079017	1.04774	8.02e-09	1.62e-07	Ifi27l2a
ENSMUSG00000079018	1.45672	6.15e-10	1.58e-08	Ly6c1
ENSMUSG00000079037	3.05422	6.61e-20	7.7e-18	Prnp
ENSMUSG00000079138	1.05297	0.00613263	0.0220263	Gm8818
ENSMUSG00000079139	-1.08011	2.92e-05	0.00023941	Gm4204
ENSMUSG00000079164	-1.11049	0.000468197	0.0025822	Tlr5
ENSMUSG00000079298	-1.49271	2.77e-11	9.37e-10	Klrb1b
ENSMUSG00000079363	1.51472	1.61e-08	3.07e-07	Gbp4
ENSMUSG00000079445	-1.31879	6.61e-09	1.36e-07	B3gnt7
ENSMUSG00000079455	1.98477	0.000621163	0.0032765	Gm16026
ENSMUSG00000079470	1.08388	0.000232346	0.00141288	Utp14b
ENSMUSG00000079477	1.12416	2.48e-07	3.6e-06	Rab7
ENSMUSG00000079481	1.75267	7.33e-09	1.49e-07	Nhsl2
ENSMUSG00000079484	-2.21224	1.27e-15	8.64e-14	Phyhd1
ENSMUSG00000079499	1.34572	6.1e-10	1.57e-08	6530402F18Rik
ENSMUSG00000079553	-1.18622	0.000419254	0.00235395	Kifc1
ENSMUSG00000079563	-1.10678	0.00161208	0.00726281	Pglyrp2
ENSMUSG00000079594	4.91667	0.00503443	0.0186429	BC117090
ENSMUSG00000079597	3.20766	0.000885253	0.00437544	Gm5483
ENSMUSG00000079608	-1.37272	0.0121598	0.0386422	Stard6
ENSMUSG00000079659	1.65107	3.52e-11	1.18e-09	Tmem243
ENSMUSG00000079685	-1.52272	7.15e-05	0.000520211	Ulbp1
ENSMUSG00000079722	-2.6616	0.00172967	0.0076853	Ttll2
ENSMUSG00000079834	-1.09868	0.00174136	0.00772441	Tmlhe
ENSMUSG00000080530	-1.53224	0.00993573	0.0327464	Gm25540
ENSMUSG00000080783	1.04418	0.00176848	0.00781659	Gm8250
ENSMUSG00000081888	-2.63286	9.5e-05	0.000664434	Spcs2-ps
ENSMUSG00000082016	1.4381	0.000857386	0.00426292	Pgam1-ps2
ENSMUSG00000082284	1.55021	2.07e-05	0.000179206	H3f3a-ps1
ENSMUSG00000082319	1.05523	0.000341663	0.00196889	Gm8822
ENSMUSG00000082762	1.1745	0.0104632	0.0340893	Gm12366
ENSMUSG00000082806	1.19007	0.00298637	0.01211	Rpl13-ps1
ENSMUSG00000082976	2.95861	1.59e-22	2.65e-20	Gm15056
ENSMUSG00000083282	-1.78159	1.42e-08	2.74e-07	Ctsf
ENSMUSG00000083563	1.78095	7.64e-05	0.000551155	Gm13340
ENSMUSG00000083863	1.45974	0.00396915	0.0153754	Gm13341
ENSMUSG00000084289	1.73197	4.76e-05	0.000365106	Gm6977
ENSMUSG00000084807	-5.53289	1.21e-07	1.89e-06	Gm13073
ENSMUSG00000084957	1.08074	1.7e-08	3.21e-07	Bbip1
ENSMUSG00000085081	1.95603	0.00779194	0.0267289	Rptoros
ENSMUSG00000085088	1.27024	0.00972717	0.0321678	4931413K12Rik
ENSMUSG00000085129	-1.65362	0.000542869	0.00291769	5031425F14Rik
ENSMUSG00000085156	-1.44241	2.21e-05	0.000189004	Snhg15
ENSMUSG00000085178	-1.53621	9.38e-07	1.17e-05	Kdm6bos
ENSMUSG00000085223	-3.05026	4.57e-10	1.22e-08	Gm11210
ENSMUSG00000085241	1.39301	8.27e-06	8.07e-05	Snhg3
ENSMUSG00000085298	1.76306	0.000127718	0.000852953	F730035M05Rik
ENSMUSG00000085307	-4.48624	1.89e-07	2.84e-06	Gm11525
ENSMUSG00000085311	1.90197	0.00506251	0.0187371	Gm15445
ENSMUSG00000085347	1.43605	9.26e-05	0.000650758	Hk1os
ENSMUSG00000085396	-1.28686	0.00149379	0.00681198	Firre
ENSMUSG00000085399	-1.57632	0.00434726	0.0165424	Foxd2os
ENSMUSG00000085403	-1.53639	0.00859321	0.0289738	Gm13068
ENSMUSG00000085431	-1.98093	5.23e-06	5.4e-05	4930440I19Rik
ENSMUSG00000085465	1.20303	0.00276753	0.0113654	Gm15347
ENSMUSG00000085492	-1.35666	0.000179935	0.00113953	Trmt61b
ENSMUSG00000085498	1.1339	0.004428	0.0168002	Gm14023
ENSMUSG00000085525	1.2189	0.000774749	0.00392067	Gm13166
ENSMUSG00000085531	-1.95407	6.23e-09	1.29e-07	Slc36a3os
ENSMUSG00000085609	-1.05656	0.00803696	0.0274633	1700016P03Rik
ENSMUSG00000085666	-1.96616	0.0051514	0.0190183	Gm9855
ENSMUSG00000085786	-1.35852	0.000662022	0.00344848	Gm15987
ENSMUSG00000085823	1.39629	0.000248161	0.00148991	Gm13012
ENSMUSG00000085852	-1.241	0.00044251	0.00246601	Gm13807
ENSMUSG00000085887	-1.44312	0.00527013	0.0193593	Arhgap27os3
ENSMUSG00000085903	-2.43906	3.61e-06	3.9e-05	Gm15340
ENSMUSG00000085977	2.21677	5.69e-21	7.77e-19	Gm5970
ENSMUSG00000085998	-1.99367	0.00743511	0.0257286	AW822252
ENSMUSG00000086075	-1.26601	0.00599958	0.021625	Gm15728
ENSMUSG00000086150	-2.73652	7.52e-08	1.23e-06	Bach2os
ENSMUSG00000086335	2.44331	9.38e-05	0.000657888	Gm12107
ENSMUSG00000086425	1.10287	0.00806543	0.0275341	F730016J06Rik
ENSMUSG00000086481	1.59591	0.00386127	0.0150437	Gm11707
ENSMUSG00000086564	-2.08397	1.43e-26	4.74e-24	Cd101
ENSMUSG00000086693	-1.9735	0.000444229	0.00247241	A730081D07Rik
ENSMUSG00000086712	-2.12672	2.44e-08	4.5e-07	AI427809
ENSMUSG00000086763	-2.7077	5.8e-05	0.000436015	Plxna4os1
ENSMUSG00000086813	-2.60822	2.98e-06	3.27e-05	Gm13657
ENSMUSG00000086866	1.29201	0.000996982	0.0048302	4930512H18Rik
ENSMUSG00000086952	1.44577	0.00216907	0.00927783	Gm12596
ENSMUSG00000087060	-1.61929	0.00642405	0.0228993	Eldr
ENSMUSG00000087113	1.80193	0.000356678	0.00204576	Gm11714
ENSMUSG00000087150	-1.39484	2.73e-07	3.91e-06	BC064078
ENSMUSG00000087256	2.31738	5.92e-05	0.000443568	Gm15990
ENSMUSG00000087259	-2.83254	5.81e-12	2.29e-10	2610035D17Rik
ENSMUSG00000087277	-2.16312	0.000597124	0.00316498	2010013B24Rik
ENSMUSG00000087281	2.64023	2.44e-08	4.5e-07	Gm16015
ENSMUSG00000087289	-1.59453	0.000322237	0.00186908	4933424M12Rik
ENSMUSG00000087362	-2.34874	1.1e-07	1.73e-06	Gm13710
ENSMUSG00000087370	1.00983	1.59e-10	4.62e-09	Tmem170b
ENSMUSG00000087477	1.59599	1.42e-05	0.000129342	Gm13822
ENSMUSG00000087484	1.06484	0.000233257	0.00141659	2900089D17Rik
ENSMUSG00000087700	2.24669	5.42e-14	2.88e-12	Gm15283
ENSMUSG00000088088	1.98535	0.000222497	0.00136232	Rmrp
ENSMUSG00000089199	1.80867	0.000122285	0.000824811	Gm25772
ENSMUSG00000089636	1.09903	0.000332198	0.00192293	1700058P15Rik
ENSMUSG00000089669	-1.2146	2.83e-11	9.54e-10	Tnfsf13
ENSMUSG00000089844	1.79435	2.86e-07	4.07e-06	A530032D15Rik
ENSMUSG00000089968	-2.54108	0.00247445	0.0103564	Nckap5los
ENSMUSG00000090083	1.41497	0.000185342	0.00116968	Rnf8
ENSMUSG00000090254	-5.42069	2.6e-06	2.91e-05	Gm1965
ENSMUSG00000090307	2.25163	1.02e-12	4.52e-11	1700071M16Rik
ENSMUSG00000090387	-2.80796	3.9e-08	6.87e-07	Gm17056
ENSMUSG00000090394	1.05426	1.21e-10	3.59e-09	4930523C07Rik
ENSMUSG00000090439	-1.48138	0.000203987	0.00126589	Gm17455
ENSMUSG00000090631	-1.51777	0.0132451	0.0413781	Olfr456
ENSMUSG00000090665	-3.18712	1.98e-24	4.69e-22	Gad1-ps
ENSMUSG00000090675	-1.65213	0.00769791	0.026496	Olfr111
ENSMUSG00000090698	-1.33195	0.000337792	0.00195016	Apold1
[truncated: 199 more rows]
